# Supplementary material for: Refining a steroidogenic model: an analysis of RNA-seq datasets from insect prothoracic glands
Source: BMC Genomics. 2018 Jul 13;19:537. doi: 10.1186/s12864-018-4896-2 (PMC6045881; doi:10.1186/s12864-018-4896-2)
Supplement: Supplementary file 5 — Table S5. Tabulation of the 231 differentially spliced loci identified by Cufflinks in Bombyx mori PGs between V-0 and V-6 of the 5th instar. In cases where a gene model was included between the test ID coordinates (Column C), this is indicated using the nomenclature of KAIKObase (http://sgp.dna.affrc.go.jp/KAIKObase/) or it is left empty. Each test was annotated with its corresponding data from the Bowtie2 output [28] (columns U to AB) and the results of the Blastp analysis against the Bm protein reference sequences (NCBI annotation release 102) (columns AC and AD). (XLSX 132 kb) [file 12864_2018_4896_MOESM5_ESM.xlsx]

## Sheet: Splicing annotation
Test ID	Gene ID	Bombyx mori gene name	Locus	sqrt(JS)	p value	q value	significant	Transdecoder-calculated protein length	Test ID coordinates	Strand	Status	Cufflinks value:Day 0 of the 5th instar	Cufflinks value:Day 6 of the 5th instar	Cufflinks:log2 fold change between Day 6 vs Day 0	Test statistics	p value2	q value3	Significant fold change between Day 0 and Day 6	Protein description	natural normalized fold change DV0 vs DV6	log2 normalized fold change DV0 vs DV6	natural normalized mean counts DV0	log2 normalized mean counts DV0	rpgm normalized mean counts DV0	natural normalized mean counts DV6	log2 normalized mean counts DV6	rpgm normalized mean counts DV6	Highest hit GenBank ID	Similarity %
TCONS_00002655	XLOC_002591	BMgn012658	Bm_scaf129:308860-321613	0.154461	0.0015	0.0280154	yes	476	TCONS_00002655:274-1701	(+)	OK	2.69994	4.36996	0.694693	1.26257	0.03515	0.120449	no	CCR4-NOT transcription complex subunit 11	1.00525	0.00755622	889	9.7952	0.085342	893	9.8033	0.0857902	XP_004926993.1	100000
TCONS_00002685	XLOC_002602	-	Bm_scaf129:541073-541942	0.65909	5e-05	0.0016115	yes				OK	4.66548	1.2796	-1.86633	-1.35737	0.0773	0.215664	no
TCONS_00005702	XLOC_005284	-	Bm_scaf182:1304-15193	0.493324	5e-05	0.0016115	yes				OK	0.177394	2.91898	4.04043	1.85446	0.22525	0.426858	no
TCONS_00006257	XLOC_005768	BMgn014422	Bm_scaf198:35659-75066	0.832555	5e-05	0.0016115	yes	1609	TCONS_00006257:1-4827	(+)	OK	0	0.344182	inf	#NAME?	0.12395	0.296705	no	dynein heavy chain 3, axonemal	0.023252	-5.4265	2021	10.9766	0.15341	47	5.54675	0.00356709	XP_021204584.1	96535
TCONS_00007309	XLOC_006736	BMgn013110	Bm_scaf219:30499-71070	0.327688	0.0001	0.00286772	yes	152	TCONS_00007309:3-455	(-)	OK	2.64508	6.44685	1.28528	1.34533	0.0301	0.10695	no	gag-like protein	13.3455	3.73829	127	7.00305	0.0166275	1699	10.7278	0.221903	BAB21762.1	26515
TCONS_00007316	XLOC_006737	BMgn013109	Bm_scaf219:105807-123455	0.216484	0.0004	0.00958421	yes	326	TCONS_00007316:2-979	(+)	OK	10.8025	14.1155	0.38592	1.4417	0.01275	0.0547842	no	neo-calmodulin	1.99232	0.994452	999	9.96501	0.0813114	1990	10.9559	0.161999	XP_004927631.1	100000
TCONS_00007882	XLOC_007239	BMgn006233	Bm_scaf231:49943-55957	0.315353	0.00045	0.0104389	yes	416	TCONS_00007882:1-1248	(+)	OK	9.9176	3.27974	-1.59641	-1.65262	0.02405	0.0896094	no	tRNA-dihydrouridine(20) synthase [NAD(P)+]-like isoform X1	0.948887	-0.0756924	1317	10.3621	0.279748	1250	10.2881	0.265449	XP_004927682.1	97179
TCONS_00008661	XLOC_007929	-	Bm_scaf266:51742-55002	0.322561	0.00315	0.0496636	yes				OK	1.94801	2.11305	0.117325	0.236914	0.6809	0.822313	no
TCONS_00008670	XLOC_007934	BMgn009948	Bm_scaf267:2-17072	0.509436	5e-05	0.0016115	yes	289	TCONS_00008670:3-866	(+)	OK	0.12836	252.075	10.9394	3.53465	0.1188	0.290009	no	4-coumarate--CoA ligase 1-like	26.0197	4.70153	254	7.93789	0.11304	6609	12.6903	2.94126	XP_004927714.2	97527
TCONS_00010335	XLOC_009481	BMgn001337,BMgn001338	Bm_scaf313:11264-26041	0.660492	5e-05	0.0016115	yes	526	TCONS_00010335:2-1579	(+)	OK	2.08889	25.3672	3.60216	7.64337	5e-05	0.000445332	yes	UDP-glycosyltransferase UGT41A1 precursor	9.14236	3.19257	96	6.59589	0.0140371	878	9.77562	0.128333	NP_001243993.1	100000
TCONS_00012938	XLOC_011955	BMgn014521	Bm_scaf424:22862-28710	0.346097	0.0004	0.00958421	yes	737	TCONS_00012938:1394-3604	(+)	OK	0.471635	1.6232	1.7831	2.11978	0.00245	0.0141615	yes	centromere protein J	1.41614	0.501963	211	7.71279	0.0435352	298	8.22359	0.0616519	XP_004933797.1	100000
TCONS_00013580	XLOC_012570	-	Bm_scaf477:15668-18590	0.619058	5e-05	0.0016115	yes				OK	20.2718	1.33344	-3.92625	-1.64377	0.2017	0.400286	no
TCONS_00015866	XLOC_014785	-	Bm_scaf623:1-12295	0.201914	0.00145	0.0275047	yes				OK	9.20356	1.81743	-2.34029	-4.85414	5e-05	0.000445332	yes
TCONS_00019683	XLOC_018479	BMgn002107	chr1:2212376-2297942	0.313061	5e-05	0.0016115	yes	788	TCONS_00019683:1-2364	(+)	OK	3.76378	14.69	1.96458	2.91779	5e-05	0.000445332	yes	protein-methionine sulfoxide oxidase Mical isoform X4	3.47939	1.79884	679	9.40586	0.0748577	2364	11.1995	0.260459	XP_021208045.1	98723
TCONS_00019877	XLOC_018561	BMgn000640	chr1:7866276-7901648	0.621594	5e-05	0.0016115	yes	118	TCONS_00019877:14780-15133	(+)	OK	0	1.25678	inf	#NAME?	0.12225	0.294282	no	cytochrome P450 Cyp305B1 precursor	74.1579	6.21253	13	3.68509	0.000572401	939	9.87591	0.0424481	NP_001106220.1	100000
TCONS_00019900	XLOC_018569	BMgn000647	chr1:8515520-8526162	0.242274	5e-05	0.0016115	yes	597	TCONS_00019900:182-1972	(+)	OK	37.808	59.5497	0.655401	2.2883	0.0002	0.00158944	yes	nucleobindin-2 isoform X2	1.0616	0.0862425	812	9.66328	1.82808	862	9.74539	1.94069	XP_004929827.1	100000
TCONS_00020085	XLOC_018662	BMgn000715	chr1:11639584-11663553	0.197094	5e-05	0.0016115	yes	423	TCONS_00020085:214-1482	(+)	OK	95.1875	147.308	0.629992	1.92328	0.00135	0.0086237	yes	probable medium-chain specific acyl-CoA dehydrogenase, mitochondrial isoform X2	2.16215	1.11247	8001	12.9635	0.334155	17299	14.0737	0.722494	XP_004929915.1	100000
TCONS_00020604	XLOC_018896	BMgn002002	chr1:4636163-4695722	0.157753	0.00205	0.035723	yes	474	TCONS_00020604:328-1749	(+)	OK	10.6027	4.018	-1.39988	-4.12145	5e-05	0.000445332	yes	calcium-binding mitochondrial carrier protein SCaMC-2 isoform X1	0.288088	-1.79542	1304	10.3157	0.155405	376	8.55386	0.0447702	XP_021207989.1	100000
TCONS_00020688	XLOC_018922	BMgn000584	chr1:6877150-6903715	0.676348	5e-05	0.0016115	yes	304	TCONS_00020688:25-936	(+)	OK	8.10718	2.54254	-1.67293	-3.19689	5e-05	0.000445332	yes	BmDomeless	0.28461	-1.81294	992	9.94362	0.111486	282	8.14556	0.03173	XP_004929814.1	100000
TCONS_00020922	XLOC_019009	BMgn000503	chr1:12008250-12046159	0.669179	5e-05	0.0016115	yes	588	TCONS_00020922:1-1764	(+)	OK	20.1938	30.4944	0.594631	1.02454	0.07905	0.219341	no	ankyrin repeat domain-containing protein 12 isoform X2	1.32496	0.405946	3157	11.6229	0.334392	4183	12.0307	0.443056	XP_012548982.1	95043
TCONS_00020954	XLOC_019026	BMgn000485	chr1:12955127-13010454	0.142041	0.0016	0.028991	yes	1104	TCONS_00020954:290-3601	(+)	OK	22.313	12.6163	-0.822596	-2.17699	0.00055	0.0039299	yes	period isoform X3	0.978013	-0.032075	5109	12.3095	0.106695	4997	12.281	0.104349	XP_012548897.1	100000
TCONS_00020992	XLOC_019043	BMgn014716	chr1:14383576-14399911	0.35239	5e-05	0.0016115	yes	162	TCONS_00020992:1324-1809	(-)	OK	0.797109	0.927016	0.217818	0.146524	0.80425	0.895761	no	Uncharacterized protein	0.570012	-0.810935	269	8.07649	0.0700703	153	7.26945	0.039941	BAH66342.1	64.286
TCONS_00021092	XLOC_019090	BMgn012258	chr1:17133362-17168565	0.209015	0.0027	0.044096	yes	1568	TCONS_00021092:557-5260	(+)	OK	4.04028	2.74166	-0.559408	-1.1549	0.04645	0.147887	no	otoferlin-like	0.425806	-1.23173	723	9.45306	0.275136	308	8.26668	0.117155	XP_004933216.3	100000
TCONS_00021183	XLOC_019122	BMgn003899	chr1:20941862-20974465	0.533438	0.0001	0.00286772	yes	518	TCONS_00021183:1-1554	(+)	OK	1.49266	6.48004	2.11812	1.81522	0.0601	0.178908	no	protein angel-like	1.20452	0.268461	324	8.34106	0.120436	391	8.60891	0.145067	XP_021202846.1	100000
TCONS_00021217	XLOC_019132	BMgn003891	chr1:21556343-21577673	0.233	5e-05	0.0016115	yes	835	TCONS_00021217:14-2518	(+)	OK	9.84227	10.0672	0.0325964	0.0851483	0.88035	0.937569	no	transcription initiation factor TFIID subunit 4	1.21405	0.279828	1314	10.3349	0.0894835	1596	10.6377	0.108637	XP_012544788.1	100000
TCONS_00021687	XLOC_019536	BMgn006708	chr10:2937823-2962727	0.266705	5e-05	0.0016115	yes	1060	TCONS_00021687:93-3272	(+)	OK	36.9767	42.7226	0.208382	0.679661	0.23595	0.437638	no	serine/arginine repetitive matrix protein 2 isoform X4	1.05164	0.072645	6300	12.6204	0.261169	6625	12.6911	0.274657	XP_004930373.1	100000
TCONS_00021748	XLOC_019569	BMgn006736	chr10:4244079-4258981	0.314953	0.00045	0.0104389	yes	468	TCONS_00021748:139-1542	(+)	OK	2.8547	9.7597	1.7735	1.82134	0.00825	0.0385992	yes	protein abrupt-like isoform X3	1.93641	0.953386	556	9.11766	0.10437	1076	10.0705	0.202104	XP_012549420.1	84797
TCONS_00021805	XLOC_019607	BMgn006760	chr10:5310786-5322351	0.372334	5e-05	0.0016115	yes	129	TCONS_00021805:122-508	(+)	OK	15.7331	21.1339	0.425751	0.500281	0.37745	0.579842	no	mitochondrial inner membrane protease ATP23 homolog	1.23363	0.302913	1039	10.0202	0.262954	1281	10.3225	0.324388	XP_012549533.1	100000
TCONS_00022278	XLOC_019810	BMgn002810	chr10:17427480-17448885	0.418561	5e-05	0.0016115	yes	219	TCONS_00022278:123-779	(+)	OK	9.90908	20.9263	1.0785	2.54707	5e-05	0.000445332	yes	Fibroin-modulator-binding protein-1	1.69917	0.764828	280	8.13353	0.189671	476	8.89621	0.322282	NP_001036969.1	100000
TCONS_00022419	XLOC_019871	BMgn006656	chr10:1494813-1504841	0.31061	0.0001	0.00286772	yes	726	TCONS_00022419:154-2331	(+)	OK	7.38321	13.0446	0.821133	2.11303	0.00035	0.00262811	yes	peroxisomal acyl-coenzyme A oxidase 3	2.47924	1.3099	1036	10.0175	0.104476	2568	11.3155	0.25902	XP_021206427.1	100000
TCONS_00022553	XLOC_019928	BMgn006603	chr10:4304492-4313860	0.494217	0.0006	0.0132436	yes	981	TCONS_00022553:2-2944	(+)	OK	52.931	58.2848	0.139006	0.281429	0.60475	0.770484	no	sarco/endoplasmic reticulum calcium ATPase	0.712258	-0.489527	10711	13.3035	1.88209	7629	12.8933	1.34054	NP_001157948.1	99694
TCONS_00022672	XLOC_019978	BMgn006551	chr10:6773233-6832569	0.355169	5e-05	0.0016115	yes	1357	TCONS_00022672:234-4304	(+)	OK	5.32584	7.32285	0.459396	1.14788	0.0523	0.161666	no	kinase D-interacting substrate of 220 kDa isoform X2	0.866559	-0.20663	2483	11.2751	0.0857952	2152	11.0715	0.0743467	XP_012549442.1	99178
TCONS_00022726	XLOC_020006	BMgn006830	chr10:9092266-9116083	0.22733	5e-05	0.0016115	yes	1956	TCONS_00022726:514-6381	(+)	OK	10.1052	12.9803	0.361224	1.00638	0.08115	0.223388	no	nipped-B-like protein A	1.15151	0.203527	3984	11.9579	0.225282	4588	12.1634	0.259414	XP_012544700.1	99948
TCONS_00022740	XLOC_020013	BMgn006824	chr10:9425724-9438828	0.450288	5e-05	0.0016115	yes	237	TCONS_00022740:447-1157	(+)	OK	14.8562	11.9999	-0.308038	-0.584294	0.31375	0.515228	no	DnaJ (Hsp40) homolog 4	0.575929	-0.796038	4370	12.0893	0.333511	2517	11.2978	0.192079	NP_001157382.1	100000
TCONS_00022782	XLOC_020027	BMgn006810	chr10:9879161-9894728	0.155245	0.00085	0.0172944	yes	898	TCONS_00022782:144-2837	(+)	OK	20.1447	27.8205	0.465752	1.14833	0.04715	0.149575	no	cell division cycle 2 like-1 isoform X1	1.06403	0.0895417	6976	12.7669	0.449376	7422	12.8577	0.478151	XP_012544661.1	100000
TCONS_00022939	XLOC_020092	BMgn002930	chr10:15305651-15332348	0.211658	5e-05	0.0016115	yes	500	TCONS_00022939:329-1828	(+)	OK	93.9561	32.6533	-1.52476	-5.63887	5e-05	0.000445332	yes	uncharacterized protein LOC101744916 isoform X1	0.450879	-1.14919	10654	13.3727	0.401947	4804	12.2294	0.181229	XP_004921638.1	100000
TCONS_00023008	XLOC_020115	BMgn002912	chr10:16451488-16944129	0.608994	5e-05	0.0016115	yes	1296	TCONS_00023008:477-4364	(+)	OK	0.071777	1.46255	4.34882	2.85464	0.0445	0.143617	no	uncharacterized protein LOC101740438 isoform X4	1.28844	0.36563	733	9.51315	0.0515454	944	9.88373	0.0664134	XP_012548988.1	99846
TCONS_00023559	XLOC_020522	BMgn001739	chr11:737454-778000	0.177353	0.0024	0.0406549	yes	554	TCONS_00023559:247-1908	(+)	OK	14.8219	15.4539	0.0602447	0.216519	0.7044	0.837889	no	signal transducer and activator of transcription long isoform	1.28625	0.363171	5694	12.4739	0.150234	7324	12.8386	0.193239	AEL16992.1	98358
TCONS_00023820	XLOC_020622	-	chr11:4016056-4017552	0.61588	5e-05	0.0016115	yes				OK	0.0358261	0.639217	4.15722	1.26554	0.19365	0.390494	no
TCONS_00024198	XLOC_020770	BMgn011687	chr11:12519343-12525449	0.34808	0.0005	0.0113812	yes	375	TCONS_00024198:3-1127	(+)	OK	80.6956	82.0156	0.0234069	0.0286206	0.96055	0.97616	no	leukocyte receptor cluster member 8 homolog	0.963777	-0.0532291	14291	13.8025	5.03204	13773	13.7469	4.84977	XP_004931499.1	100000
TCONS_00024216	XLOC_020774	BMgn011692	chr11:12602286-12621467	0.195849	0.0028	0.0449233	yes	506	TCONS_00024216:103-1620	(+)	OK	7.05845	15.8213	1.16445	1.17034	0.046	0.146875	no	tether containing UBX domain for GLUT4	1.49076	0.576047	2345	11.1943	0.305813	3495	11.759	0.455893	XP_012550454.1	99208
TCONS_00024406	XLOC_020870	BMgn012052	chr11:18180848-18190646	0.196479	5e-05	0.0016115	yes	586	TCONS_00024406:552-2309	(+)	OK	15.188	3.93773	-1.94749	-3.8991	5e-05	0.000445332	yes	zinc finger protein 502-like isoform X1	0.490616	-1.02733	2149	11.0672	0.784879	1054	10.0412	0.385074	XP_012551576.1	100000
TCONS_00024532	XLOC_020922	BMgn001705	chr11:211176-216664	0.420603	5e-05	0.0016115	yes	319	TCONS_00024532:2-958	(+)	OK	6.92287	9.11194	0.396388	1.29329	0.02625	0.0961088	no	RNA-binding protein 48	0.644692	-0.633319	389	8.60371	0.352338	251	7.97279	0.227149	XP_012548091.1	100000
TCONS_00024722	XLOC_020996	BMgn001634	chr11:3007209-3011414	0.497933	5e-05	0.0016115	yes	408	TCONS_00024722:1-1224	(+)	OK	0	0.53641	inf	#NAME?	0.1191	0.290387	no	uncharacterized protein LOC101745063	7.58537	2.92322	13	3.7664	0.0031572	103	6.67809	0.0255899	XP_012548151.2	86.079
TCONS_00024919	XLOC_021075	BMgn011965	chr11:6741798-6754211	0.241024	5e-05	0.0016115	yes	621	TCONS_00024919:423-2285	(+)	OK	19.7547	48.0213	1.28148	3.27669	5e-05	0.000445332	yes	ATP-dependent RNA helicase dbp2-like	1.74825	0.805909	4183	12.0188	0.411356	7312	12.8347	0.719152	XP_004924160.1	100000
TCONS_00025192	XLOC_021192	BMgn011802	chr11:12054757-12062869	0.386774	5e-05	0.0016115	yes	235	TCONS_00025192:2-706	(+)	OK	1.44206	1.03267	-0.481757	-0.633324	0.2745	0.473432	no	uncharacterized protein LOC101745617	0.646396	-0.629509	147	7.20645	0.0495951	95	6.57322	0.0319388	XP_021204719.1	98667
TCONS_00025250	XLOC_021211	BMgn011786	chr11:12567017-12598130	0.48816	0.0003	0.00743265	yes	103	TCONS_00025250:3-311	(+)	OK	9.43937	4.10392	-1.20169	-0.983943	0.09725	0.253497	no	ganglioside-induced differentiation-associated-protein	0.788255	-0.343266	403	8.65728	0.0616396	318	8.3122	0.0485877	NP_001186866.1	98020
TCONS_00026246	XLOC_021862	BMgn010670	chr12:11748248-11752333	0.213051	0.00125	0.0240873	yes	324	TCONS_00026246:2105-3076	(-)	OK	12.0717	6.83547	-0.820521	-1.74562	0.0069	0.0334427	yes	E3 ubiquitin-protein ligase MGRN1	0.783047	-0.352829	893	9.80305	0.441041	699	9.45003	0.345356	XP_021208538.1	40323
TCONS_00026339	XLOC_021913	BMgn005223	chr12:15220520-15255291	0.772737	5e-05	0.0016115	yes	308	TCONS_00026339:932-1855	(+)	OK	13.0936	53.8758	2.04077	6.30363	5e-05	0.000445332	yes	synaptic vesicle glycoprotein 2C-like isoform X1	4.95471	2.3088	2914	11.5001	0.0868421	14440	13.8116	0.430277	XP_004926573.1	100000
TCONS_00026366	XLOC_021922	BMgn005210	chr12:16457349-16463572	0.278858	5e-05	0.0016115	yes	511	TCONS_00026366:2-1534	(+)	OK	10.858	16.5919	0.61173	1.48472	0.0114	0.0500828	no	la-related protein 7	1.02943	0.0418524	1280	10.3214	0.206132	1317	10.3628	0.212199	XP_004926804.2	100000
TCONS_00026395	XLOC_021937	BMgn005879	chr12:17911974-17919239	0.131494	0.0015	0.0280154	yes	339	TCONS_00026395:104-1120	(+)	OK	43.9988	28.4931	-0.626851	-1.99147	0.00105	0.00692898	yes	uncharacterized protein LOC101742337 isoform X1	0.8783	-0.187214	1906	10.8971	0.262725	1674	10.7098	0.230752	XP_004924728.1	100000
TCONS_00026552	XLOC_022019	BMgn010446	chr12:3145429-3152895	0.16474	0.0002	0.00524029	yes	326	TCONS_00026552:116-1093	(+)	OK	68.321	57.3605	-0.252272	-0.50479	0.3547	0.558118	no	UBX domain-containing protein 1	1.09774	0.134542	2793	11.4472	0.765835	3066	11.5799	0.840691	XP_004929435.1	100000
TCONS_00026833	XLOC_022151	BMgn010621	chr12:11714137-11728927	0.611865	5e-05	0.0016115	yes	799	TCONS_00026833:173-2569	(+)	OK	0	24.7707	inf	#NAME?	0.1031	0.264193	no	ribonucleoside-diphosphate reductase large subunit	2.64396	1.4027	1106	10.1099	0.204677	2923	11.5101	0.541158	XP_004925552.1	100000
TCONS_00026878	XLOC_022173	BMgn010331,BMgn010332	chr12:12952501-13013326	0.230176	0.0001	0.00286772	yes	1517	TCONS_00026878:357-4907	(+)	OK	8.4328	12.3919	0.555312	1.34138	0.02275	0.0859524	no	multidrug resistance-associated protein 1 isoform X2	0.940504	-0.0884935	846	9.7248	0.193992	796	9.63621	0.182451	XP_012546133.1	100000
TCONS_00027049	XLOC_022252	BMgn005838	chr12:20142981-20150618	0.157404	0.0016	0.028991	yes	734	TCONS_00027049:357-2558	(+)	OK	15.8959	18.7414	0.237569	0.721936	0.2083	0.408486	no	U4/U6	0.871137	-0.199029	2351	11.1987	0.337254	2048	10.9998	0.293794	XP_004926932.1	100000
TCONS_00027395	XLOC_022505	BMgn000862	chr13:4600224-4620012	0.331766	5e-05	0.0016115	yes	567	TCONS_00027395:728-2428	(+)	OK	1.60582	2.78127	0.792438	1.36391	0.02255	0.0853907	no	kinesin-related protein 4	1.29619	0.374275	568	9.14715	0.0339892	737	9.52629	0.0440564	XP_021204746.1	100000
TCONS_00027551	XLOC_022567	BMgn000926,BMgn000927	chr13:7786231-7806117	0.149748	0.00225	0.0384718	yes	340	TCONS_00027551:3-1022	(+)	OK	21.8536	124.779	2.51344	3.80279	5e-05	0.000445332	yes	transaldolase	1.95525	0.967351	5400	12.3954	0.782269	10558	13.3657	1.52953	NP_001040544.1	99398
TCONS_00027611	XLOC_022590	BMgn000950	chr13:9167567-9188203	0.158378	0.00255	0.0424068	yes	1410	TCONS_00027611:203-4432	(+)	OK	13.853	26.0766	0.912557	1.87811	0.00265	0.0150503	yes	THO complex subunit 2 isoform X1	0.967355	-0.047883	9220	13.1668	0.449663	8919	13.1199	0.434983	XP_012547253.1	100000
TCONS_00027642	XLOC_022601	BMgn000964	chr13:9776100-9859701	0.668202	0.0027	0.044096	yes	2669	TCONS_00027642:264-8270	(+)	OK	0.655332	4.22757	2.68953	1.96596	0.0476	0.150429	no	teneurin-a isoform X3	3.70069	1.88779	434	8.73814	0.0425942	1607	10.6511	0.157628	XP_012547288.1	99664
TCONS_00027805	XLOC_022671	BMgn001030	chr13:13552088-13569666	0.27841	0.0005	0.0113812	yes	210	TCONS_00027805:1-630	(+)	OK	154.439	64.7732	-1.25357	-3.09568	5e-05	0.000445332	yes	troponin I	0.301138	-1.7315	7058	12.6337	0.401506	2125	11.0538	0.120909	NP_001037295.1	93665
TCONS_00027872	XLOC_022700	BMgn001062	chr13:16287109-16307015	0.425125	0.0001	0.00286772	yes	122	TCONS_00027872:224-589	(+)	OK	10.7209	7.49911	-0.515631	-0.589492	0.2964	0.496842	no	protein yippee-like CG15309 isoform X2	1.74256	0.801209	997	9.96058	0.367625	1737	10.7633	0.64061	NP_001037086.1	100
TCONS_00028114	XLOC_022794	BMgn001271	chr13:5188601-5195938	0.343533	5e-05	0.0016115	yes	939	TCONS_00028114:134-2950	(+)	OK	10.4289	9.4001	-0.149838	-0.301025	0.5866	0.757183	no	putative leucine-rich repeat-containing protein DDB_G0290503 isoform X3	0.706107	-0.502042	611	9.24284	0.368717	432	8.75369	0.260354	XP_012547330.1	100000
TCONS_00028489	XLOC_022949	BMgn001157	chr13:11393877-11446044	0.417702	0.00075	0.0158808	yes	261	TCONS_00028489:89-871	(+)	OK	0.69954	5.66622	3.01791	3.3598	5e-05	0.000445332	yes	beadex/dLMO protein	3.22833	1.69079	200	7.59978	0.0216403	646	9.32056	0.0698622	NP_001040254.1	93617
TCONS_00029117	XLOC_023372	BMgn009254	chr14:5446362-5505309	0.127308	0.0011	0.0214235	yes	695	TCONS_00029117:206-2290	(+)	OK	24.6467	43.5006	0.819642	2.53925	5e-05	0.000445332	yes	stromal interaction molecule 1 isoform X2	1.52626	0.610001	7280	12.8258	0.123535	11111	13.4384	0.188546	XP_012551147.1	100000
TCONS_00029146	XLOC_023386	BMgn009269	chr14:6467467-6557160	0.527424	5e-05	0.0016115	yes	1163	TCONS_00029146:547-4035	(+)	OK	16.4056	7.39025	-1.15049	-3.02032	5e-05	0.000445332	yes	Protein Kibra	0.577107	-0.79309	210	7.69545	0.730546	121	6.92908	0.421603	XP_004922701.1	100000
TCONS_00029441	XLOC_023534	BMgn009456	chr14:2672549-2692938	0.319505	5e-05	0.0016115	yes	237	TCONS_00029441:2165-2875	(-)	OK	1.20005	1.63883	0.449579	1.15716	0.0462	0.147294	no	Uncharacterized protein	1.06635	0.092682	69	6.12788	0.0496657	74	6.22508	0.0530086
TCONS_00029465	XLOC_023547	BMgn016055	chr14:3128267-3134035	0.469095	5e-05	0.0016115	yes	310	TCONS_00029465:41-970	(+)	OK	9.71139	2.71556	-1.83843	-1.6084	0.04535	0.145482	no	GDP-D-glucose phosphorylase 1	0.45897	-1.12353	829	9.69621	0.271249	380	8.57183	0.124495	XP_004922840.1	100000
TCONS_00030194	XLOC_024055	BMgn007656	chr15:2602517-2607965	0.293273	0.001	0.0197935	yes	179	TCONS_00030194:169-705	(-)	OK	3.94645	23.9834	2.60341	2.52971	0.001	0.00663999	yes	Rbp1-like RNA-binding protein PB	1.54543	0.628008	3698	11.8217	1.14525	5715	12.4722	1.7699	XP_021201925.1	32558
TCONS_00030404	XLOC_024145	BMgn007714	chr15:7728746-7773047	0.392735	5e-05	0.0016115	yes	1150	TCONS_00030404:205-3654	(+)	OK	0.605896	7.21906	3.57467	1.45256	0.19545	0.392039	no	Uncharacterized protein	0.443149	-1.17414	457	8.8319	0.0794257	203	7.65269	0.0351974	XP_012547890.1	99393
TCONS_00030557	XLOC_024192	BMgn007760	chr15:9619549-9628439	0.215471	0.0008	0.016461	yes	661	TCONS_00030557:88-2070	(+)	OK	2.63442	8.20299	1.63866	2.87354	5e-05	0.000445332	yes	uncharacterized protein LOC101742164	1.83216	0.873549	1474	10.5234	0.176213	2700	11.3981	0.322851	XP_004928471.1	100000
TCONS_00030587	XLOC_024204	BMgn007500	chr15:11016820-11029939	0.160038	0.00015	0.00417023	yes	455	TCONS_00030587:299-1663	(+)	OK	26.1573	42.2466	0.691623	1.25752	0.0308	0.108753	no	membrane protein TMS1 isoform X2	0.824585	-0.27826	8249	13.0092	0.699958	6802	12.7272	0.577174	XP_012544490.1	100000
TCONS_00030861	XLOC_024332	BMgn003438	chr15:16333063-16461806	0.25631	0.0003	0.00743265	yes	494	TCONS_00030861:1-1482	(+)	OK	33.2145	10.595	-1.64844	-2.20668	0.00245	0.0141615	yes	kelch domain-containing protein 4	0.524731	-0.93035	1705	10.7319	0.230811	895	9.80487	0.121114	XP_004923059.1	100000
TCONS_00030960	XLOC_024381	BMgn007965	chr15:915683-927000	0.193153	0.00045	0.0104389	yes	346	TCONS_00030960:143-1180	(+)	OK	34.2899	34.2507	-0.00164944	-0.00416813	0.99495	0.995981	no	uncharacterized protein LOC101738399 isoform X2	1.24873	0.320456	1569	10.5954	0.418601	1960	10.9338	0.522717	XP_004928697.1	100
TCONS_00031334	XLOC_024526	BMgn007842	chr15:6750812-6759233	0.127486	0.00125	0.0240873	yes	673	TCONS_00031334:363-2381	(+)	OK	44.6624	32.9098	-0.440543	-1.62026	0.00465	0.0241013	yes	protein arginine N-methyltransferase 5 isoform X3	0.61821	-0.693831	4701	12.1919	0.578401	2906	11.5022	0.357574	XP_004928553.1	100000
TCONS_00031436	XLOC_024565	BMgn007805	chr15:8382739-8388269	0.233889	5e-05	0.0016115	yes	131	TCONS_00031436:222-614	(+)	OK	19.4948	17.7276	-0.137087	-0.273708	0.6331	0.790234	no	lipopolysaccharide-induced tumor necrosis factor-alpha factor homolog isoform X1	0.698748	-0.517155	3169	11.6268	0.599735	2214	11.1039	0.419064	XP_004928515.1	100000
TCONS_00031602	XLOC_024629	BMgn007586	chr15:11040727-11054116	0.374973	5e-05	0.0016115	yes	436	TCONS_00031602:207-1514	(+)	OK	0.733787	15.6772	4.41716	2.58445	0.0416	0.136913	no	NADPH-specific isocitrate dehydrogenase	2.9556	1.56345	1216	10.2422	0.170761	3595	11.8099	0.504703	NP_001093090.1	100000
TCONS_00031932	XLOC_024765	BMgn016259	chr15:17842287-17849415	0.332692	5e-05	0.0016115	yes	110	TCONS_00031932:40-369	(+)	OK	12.9269	93.538	2.85518	4.38577	5e-05	0.000445332	yes	carboxypeptidase inhibitor precursor	2.63293	1.39667	636	9.30717	0.0894298	1674	10.6529	0.235462	NP_001106745.1	95575
TCONS_00032362	XLOC_025089	BMgn016290	chr16:2584347-2628126	0.133122	0.00215	0.0371104	yes	410	TCONS_00032362:3-1232	(+)	OK	2.26428	6.84829	1.59669	4.09628	5e-05	0.000445332	yes	ceramide synthase 6-like isoform X2	3.26489	1.70703	1036	10.0143	0.0987478	3381	11.7208	0.3224	XP_021205426.1	99461
TCONS_00032368	XLOC_025091	BMgn012812	chr16:2685173-2709406	0.14512	0.00155	0.0283673	yes	291	TCONS_00032368:386-1258	(+)	OK	9.48564	9.19613	-0.0447183	-0.130159	0.81945	0.903352	no	sex-lethal isoform L	1.14692	0.197761	1314	10.3598	0.0570812	1507	10.558	0.0654674	NP_001036780.1	100000
TCONS_00032459	XLOC_025128	BMgn012843	chr16:5069151-5106497	0.224552	5e-05	0.0016115	yes	1009	TCONS_00032459:120-3146	(+)	OK	14.4884	14.8941	0.0398388	0.0626743	0.88705	0.940724	no	jmjC domain-containing histone demethylation protein 1 isoform X3	0.316076	-1.66166	6374	12.6353	0.348554	2015	10.9706	0.110169	XP_021205389.1	100000
TCONS_00032567	XLOC_025179	BMgn012887	chr16:7508141-7526102	0.716832	5e-05	0.0016115	yes	311	TCONS_00032567:94-1026	(+)	OK	0.131766	0.526959	1.99971	1.2814	0.2676	0.467045	no	alpha-tocopherol transfer protein-like	0.559211	-0.838537	152	7.12396	0.00846278	85	6.37408	0.00473248	XP_004928861.1	100000
TCONS_00032623	XLOC_025199	BMgn012908	chr16:8626094-8647754	0.445181	0.00135	0.0258774	yes	941	TCONS_00032623:159-2981	(+)	OK	0.243127	1.4712	2.59721	2.27571	0.04135	0.1363	no	RIMS-binding protein 2 isoform X2	2.28919	1.19484	315	8.27868	0.0249676	720	9.49436	0.0571557	XP_021205487.1	100000
TCONS_00032778	XLOC_025275	BMgn013200	chr16:14973406-14981660	0.344948	0.0002	0.00524029	yes	280	TCONS_00032778:269-1108	(+)	OK	12.1595	14.379	0.241877	0.911311	0.11615	0.285988	no	GPN-loop GTPase 3	0.655879	-0.608498	1545	10.5936	0.378028	1013	9.9847	0.247941	XP_004922723.1	100000
TCONS_00032825	XLOC_025295	BMgn013096	chr16:311089-317392	0.221418	5e-05	0.0016115	yes	243	TCONS_00032825:348-1076	(+)	OK	47.1581	165.329	1.80976	4.78536	5e-05	0.000445332	yes	Serine/arginine-rich splicing factor 1A-like	2.3424	1.22799	2670	11.3683	0.859457	6255	12.6104	2.0132	XP_012548197.1	100000
TCONS_00032849	XLOC_025312	BMgn013087	chr16:822466-833179	0.171702	0.00045	0.0104389	yes	382	TCONS_00032849:209-1354	(+)	OK	7.72704	5.65149	-0.451286	-1.30406	0.02445	0.0907723	no	required for meiotic nuclear division protein 1 homolog	0.877169	-0.189073	730	9.50012	0.0912158	640	9.29805	0.0800117	XP_004929006.1	100000
TCONS_00032958	XLOC_025357	BMgn013059	chr16:2190518-2339708	0.300784	0.0009	0.01821	yes	475	TCONS_00032958:159-1580	(+)	OK	0.340362	4.22961	3.63538	2.35003	0.0048	0.0247716	yes	uncharacterized protein LOC101743410	1.27482	0.350299	809	9.65666	0.0123248	1031	10.0108	0.015712	XP_004929093.2	88303
TCONS_00033057	XLOC_025387	BMgn013021	chr16:4013756-4037950	0.298532	5e-05	0.0016115	yes	365	TCONS_00033057:393-1487	(+)	OK	31.5678	163.348	2.37143	6.69052	5e-05	0.000445332	yes	fructose 1,6-bisphosphate aldolase	3.06532	1.61604	3792	11.8832	0.217762	11623	13.504	0.667509	NP_001091766.1	100000
TCONS_00033172	XLOC_025435	BMgn012978	chr16:5728740-5760572	0.216137	0.0002	0.00524029	yes	1459	TCONS_00033172:251-4627	(+)	OK	8.844	10.3306	0.224152	0.519612	0.36775	0.571388	no	histone-lysine N-methyltransferase SETD1	0.909104	-0.137483	2314	11.1767	0.115769	2104	11.0392	0.105246	XP_021205522.1	100000
TCONS_00034455	XLOC_026170	BMgn005688	chr17:147255-180060	0.245966	0.00075	0.0158808	yes	178	TCONS_00034455:268-801	(+)	OK	7.0273	8.70699	0.309203	0.69974	0.2257	0.427386	no	TP53RK-binding protein-like	0.582266	-0.780251	1301	10.3407	0.821647	757	9.56464	0.478417	XP_004922015.1	100000
TCONS_00034526	XLOC_026198	BMgn016363	chr17:1624460-1659760	0.319163	5e-05	0.0016115	yes				OK	2.75078	3.90177	0.504289	1.2397	0.0381	0.127981	no	THO complex subunit 2	3.06371	1.61528	293	8.1924	0.144051	898	9.80109	0.441331	XP_012547253	24444
TCONS_00034546	XLOC_026211	BMgn005650	chr17:2095273-2145361	0.160512	5e-05	0.0016115	yes	629	TCONS_00034546:164-2047	(+)	OK	74.0545	34.7652	-1.09095	-4.02804	5e-05	0.000445332	yes	poly(A)-specific ribonuclease	0.644098	-0.634647	6848	12.741	0.136778	4411	12.1072	0.0880984	NP_001153677.1	98885
TCONS_00034586	XLOC_026230	BMgn005635	chr17:2425559-2722104	0.228191	0.00015	0.00417023	yes	155	TCONS_00034586:189-653	(+)	OK	115.456	165.808	0.522173	1.03767	0.07445	0.209803	no	Sr protein	0.957678	-0.0623869	12405	13.5677	3.32395	11880	13.5351	3.18328	NP_001040152.1	100000
TCONS_00034651	XLOC_026259	-	chr17:3612507-3620225	0.453323	0.0006	0.0132436	yes				OK	0.141015	0.699417	2.31031	1.98702	0.0104	0.0464734	yes
TCONS_00034877	XLOC_026353	BMgn007011	chr17:12099034-12219399	0.485075	5e-05	0.0016115	yes	508	TCONS_00034877:461-1984	(+)	OK	0.0463516	1.2873	4.79558	1.65341	0.22425	0.426069	no	extracellular serine/threonine protein kinase FAM20C isoform X2	0.811981	-0.300483	762	9.56996	0.00633351	619	9.26259	0.00514269	XP_004932518.1	100000
TCONS_00034987	XLOC_026405	BMgn003913	chr17:16087386-16092887	0.312459	5e-05	0.0016115	yes	335	TCONS_00034987:117-1121	(+)	OK	5.12219	3.57281	-0.519702	-0.955208	0.09905	0.256781	no	zinc finger protein 267-like isoform X2	0.827869	-0.272526	366	8.51736	0.0666181	303	8.22515	0.0551511	XP_004926675.1	100000
TCONS_00035021	XLOC_026420	BMgn003948	chr17:17381647-17391765	0.224616	5e-05	0.0016115	yes	430	TCONS_00035021:260-1549	(+)	OK	8.1525	9.86306	0.274793	0.779375	0.1785	0.372482	no	uncharacterized protein LOC101746704	1.93206	0.950141	437	8.76698	0.141042	844	9.71583	0.272502	XP_021203821.1	100000
TCONS_00035060	XLOC_026434	BMgn003931	chr17:18255008-18262656	0.280799	0.00205	0.035723	yes				OK	5.32822	4.9584	-0.10378	-0.13441	0.81725	0.902455	no	solute carrier organic anion transporter family member 5A1	0.849781	-0.234838	304	8.22974	1.33333	258	8.01569	1.13304	XP_012549230	36842
TCONS_00035603	XLOC_026823	BMgn008536	chr18:10848945-10867767	0.179258	0.00215	0.0371104	yes	875	TCONS_00035603:175-2799	(+)	OK	7.43237	9.04165	0.282763	0.679457	0.23305	0.434762	no	zinc finger CCCH domain-containing protein 14 isoform X1	0.987403	-0.0182889	688	9.42791	0.178516	679	9.40949	0.176267	XP_004928435.1	100000
TCONS_00036002	XLOC_027024	-	chr18:7730092-7992425	0.1935	0.00275	0.0443164	yes	1936	TCONS_00036002:433-6240	(+)	OK	19.262	23.1607	0.265924	0.462255	0.35645	0.559783	no	uncharacterized protein LOC101746298	1.13718	0.185455	2389	11.2138	0.866401	2716	11.4051	0.98525	XP_012547531.1	100000
TCONS_00036088	XLOC_027063	BMgn016516	chr18:10349652-10393511	0.15904	0.0001	0.00286772	yes	2166	TCONS_00036088:84-6581	(+)	OK	20.9033	36.5887	0.807672	2.72613	5e-05	0.000445332	yes	low-density lipoprotein receptor-related protein 2-like	1.41014	0.495837	651	9.34172	0.429987	918	9.83402	0.606341	XP_021202376.1	34410
TCONS_00036110	XLOC_027074	BMgn016522	chr18:11078196-11101195	0.277278	0.0002	0.00524029	yes	608	TCONS_00036110:115-1938	(+)	OK	59.4098	20.5375	-1.53244	-3.46227	5e-05	0.000445332	yes	spectrin beta chain	0.194664	-2.36094	1224	10.2569	4.19292	238	7.89477	0.81621	XP_021205020.1	98762
TCONS_00036492	XLOC_027374	BMgn012610	chr19:751636-758847	0.136638	0.0005	0.0113813	yes	481	TCONS_00036492:193-1635	(+)	OK	14.7031	6.90384	-1.09064	-3.18655	5e-05	0.000445332	yes	enhancer of mRNA-decapping protein 3, partial	0.641709	-0.640008	2738	11.4174	0.493422	1757	10.7789	0.316634	XP_004926225.3	100000
TCONS_00036597	XLOC_027424	BMgn001860	chr19:3554165-3572282	0.494655	5e-05	0.0016115	yes	130	TCONS_00036597:454-843	(+)	OK	3.33459	30.2094	3.17941	2.55684	0.0021	0.0125003	yes	uncharacterized protein LOC101746878 isoform X3	1.36666	0.450657	2754	11.4233	0.174614	3763	11.8083	0.238639	XP_021208469.1	86486
TCONS_00036647	XLOC_027439	BMgn001875	chr19:3954867-3973096	0.168328	5e-05	0.0016115	yes	818	TCONS_00036647:260-2713	(+)	OK	8.76021	9.64229	0.138411	0.434108	0.4501	0.647294	no	fanconi-associated nuclease 1-like	0.924138	-0.11382	1788	10.7996	0.120176	1653	10.6898	0.111059	XP_004933488.1	100000
TCONS_00036699	XLOC_027459	BMgn001893	chr19:5069193-5071600	0.201456	5e-05	0.0016115	yes	128	TCONS_00036699:254-637	(+)	OK	31.2385	21.8166	-0.517897	-1.4159	0.0149	0.0617545	no	recQ-mediated genome instability protein 2-like	0.548402	-0.866694	709	9.47204	0.329463	389	8.60466	0.180678	XP_004933408.1	100000
TCONS_00037206	XLOC_027709	BMgn016568	chr19:3075957-3112837	0.391987	5e-05	0.0016115	yes	356	TCONS_00037206:46-1113	(+)	OK	27.2755	62.8373	1.20402	2.69598	5e-05	0.000445332	yes	aldehyde dehydrogenase isoform 1	1.78257	0.833959	7852	12.934	0.213269	13997	13.7723	0.380166	NP_001166835.1	100000
TCONS_00037292	XLOC_027743	BMgn001934	chr19:4688892-4807463	0.283443	0.00025	0.00641197	yes	1083	TCONS_00037292:379-3627	(+)	OK	11.7882	33.6366	1.51268	3.5359	5e-05	0.000445332	yes	dystroglycan isoform X3	1.77651	0.829046	7827	12.9277	0.143339	13905	13.7618	0.254644	XP_004933416.1	100000
TCONS_00037409	XLOC_027798	BMgn004032	chr19:7970293-7984135	0.263304	0.0008	0.016461	yes	344	TCONS_00037409:147-1178	(+)	OK	2.35733	2.16828	-0.120599	-0.274096	0.61865	0.779769	no	neuropeptide receptor A20	1.24254	0.313289	179	7.41834	0.0154784	222	7.76173	0.0192324	NP_001127718.1	100000
TCONS_00037468	XLOC_027832	BMgn003997	chr19:10167578-10195520	0.340213	5e-05	0.0016115	yes	601	TCONS_00037468:88-1890	(+)	OK	7.26962	18.1831	1.32265	2.44485	5e-05	0.000445332	yes	E3 SUMO-protein ligase PIAS3 isoform X4	1.78556	0.836377	2008	10.971	0.205624	3586	11.8082	0.367155	XP_004922440.1	100000
TCONS_00037584	XLOC_027893	BMgn004145	chr19:14268980-14319922	0.316689	5e-05	0.0016115	yes	512	TCONS_00037584:35-1570	(+)	OK	23.6379	41.6938	0.81873	2.49841	5e-05	0.000445332	yes	ran-binding protein 9 isoform X3	0.960311	-0.0584265	8105	12.9846	0.159459	7783	12.9262	0.15313	XP_012544190.1	98649
TCONS_00039134	XLOC_028825	BMgn004431	chr20:1895506-1908954	0.459346	0.00175	0.0310902	yes	447	TCONS_00039134:466-1806	(+)	OK	2.61392	2.96314	0.180911	0.390079	0.4969	0.68642	no	zinc finger protein 808-like	1.37719	0.461731	342	8.42041	0.0320946	471	8.88119	0.0442005	XP_004922599.2	79813
TCONS_00039238	XLOC_028873	BMgn004379	chr20:4662376-4717708	0.163338	5e-05	0.0016115	yes	1188	TCONS_00039238:245-3808	(+)	OK	15.3341	28.0727	0.872423	2.70358	5e-05	0.000445332	yes	sister chromatid cohesion protein PDS5 homolog B-B isoform X2	1.37577	0.460239	6229	12.6041	0.121996	8570	13.0647	0.167839	XP_004922579.1	100000
TCONS_00039243	XLOC_028874	BMgn004378	chr20:4718125-4739045	0.615842	5e-05	0.0016115	yes	346	TCONS_00039243:1-1038	(+)	OK	12.0666	2.94761	-2.0334	-3.11678	5e-05	0.000445332	yes	clavesin-2 isoform X1	0.423581	-1.23929	611	9.24238	0.0877521	259	7.99648	0.0371701	XP_004922581.1	100000
TCONS_00039266	XLOC_028887	BMgn004363	chr20:5349783-5537213	0.564336	5e-05	0.0016115	yes	488	TCONS_00039266:829-2292	(+)	OK	0.0113801	0.909526	6.32053	1.53634	0.242	0.442718	no	A disintegrin and metalloproteinase with thrombospondin motifs like precursor	0.605956	-0.722715	1254	10.2885	0.0193524	760	9.57052	0.0117267	NP_001036935.1	99590
TCONS_00039373	XLOC_028937	BMgn004273	chr20:7838519-7882512	0.516771	0.00035	0.00855503	yes	616	TCONS_00039373:137-1981	(+)	OK	0.169728	2.54173	3.90452	2.38554	0.03895	0.130209	no	actin-binding protein anillin-like	4.33333	2.11548	24	4.64309	0.00315706	107	6.75907	0.0141191	XP_021203087.1	99509
TCONS_00039490	XLOC_028975	BMgn014156	chr20:10838689-10855709	0.375861	5e-05	0.0016115	yes	199	TCONS_00039490:142-738	(+)	OK	1.43137	0.863995	-0.728304	-1.17937	0.06465	0.188813	no	SH3 domain-binding protein 5-like	1.2671	0.341531	101	6.67657	0.0117243	129	7.01781	0.0148868	XP_004926184.1	100000
TCONS_00039545	XLOC_028998	BMgn009137	chr20:12698625-12740996	0.210293	5e-05	0.0016115	yes	761	TCONS_00039545:348-2630	(+)	OK	9.87609	4.83532	-1.03033	-2.77973	5e-05	0.000445332	yes	oxysterol-binding protein-related protein 6	0.29333	-1.7694	1519	10.5603	0.076245	446	8.79992	0.022365	XP_021203552.1	99.866
TCONS_00040085	XLOC_029378	BMgn001554	chr21:11238621-11240780	0.295704	5e-05	0.0016115	yes	145	TCONS_00040085:88-522	(+)	OK	20.762	17.553	-0.242225	-0.714714	0.21605	0.417345	no	Uncharacterized protein	0.442247	-1.17708	2107	11.0385	1.44292	932	9.86482	0.638128
TCONS_00040333	XLOC_029495	BMgn012428	chr21:3226660-3259441	0.190342	0.0006	0.0132436	yes	244	TCONS_00040333:3-734	(+)	OK	17.4508	61.9861	1.82865	1.4392	0.01795	0.0714493	no	hnRNPA/B-like 28	3.43351	1.77968	6999	12.7632	0.248144	24030	14.5518	0.852007	NP_001104824.1	100000
TCONS_00040482	XLOC_029564	BMgn001453	chr21:8400826-8528686	0.39798	5e-05	0.0016115	yes	184	TCONS_00040482:400-951	(+)	OK	1.59712	0.159729	-3.32178	-5.07936	5e-05	0.000445332	yes	hemicentin-2-like	0.527057	-0.923969	449	8.81077	0.00351036	236	7.88474	0.00184646	XP_021205919.1	100000
TCONS_00040623	XLOC_029646	BMgn007182	chr21:16621567-16637728	0.294387	5e-05	0.0016115	yes	596	TCONS_00040623:348-2135	(+)	OK	11.5526	13.6683	0.242617	0.595023	0.2982	0.498798	no	A-kinase anchor protein 17A	1.3355	0.417385	1228	10.2549	0.0920609	1640	10.6783	0.122948	XP_021202911.1	100000
TCONS_00040634	XLOC_029648	BMgn007178	chr21:16643579-16683377	0.168535	0.0008	0.016461	yes	315	TCONS_00040634:826-1770	(+)	OK	23.2508	19.2263	-0.274196	-0.698816	0.22315	0.424975	no	uncharacterized protein LOC105841473	1.29759	0.375832	5763	12.4923	0.157291	7478	12.8675	0.204099	XP_012544917.1	99677
TCONS_00041043	XLOC_029981	BMgn012684	chr22:3630413-3853458	0.277078	0.00185	0.0325493	yes	518	TCONS_00041043:2815-4368	(-)	OK	3.34908	3.37491	0.0110846	0.0281567	0.9629	0.977388	no	uncharacterized protein LOC101740914	1.5503	0.63255	275	8.1022	0.136341	426	8.73722	0.21137	XP_004924809.1	100000
TCONS_00041395	XLOC_030161	BMgn009974	chr22:14078691-14124000	0.266398	5e-05	0.0016115	yes	792	TCONS_00041395:776-3151	(+)	OK	12.0585	22.6025	0.906438	1.61111	0.0125	0.0538646	no	2-oxoglutarate dehydrogenase, mitochondrial	0.648101	-0.62571	6266	12.5949	0.761546	4061	11.9872	0.493559	XP_021203860.1	100000
TCONS_00041464	XLOC_030185	BMgn004687	chr22:17852822-17865973	0.27312	5e-05	0.0016115	yes	467	TCONS_00041464:224-1624	(+)	OK	5.1178	8.30353	0.698202	0.860339	0.1283	0.303504	no	cyclin-G-associated kinase-like isoform X1	0.712345	-0.489352	3092	11.5923	0.258091	2202	11.105	0.18385	XP_012546665.1	100000
TCONS_00041841	XLOC_030359	BMgn016813,BMgn016814	chr22:7457392-7461214	0.155796	0.00025	0.00641197	yes	409	TCONS_00041841:49-1275	(-)	OK	17.1632	12.9453	-0.406886	-1.01434	0.07715	0.215346	no	probable tRNA N6-adenosine threonylcarbamoyltransferase, mitochondrial	0.65991	-0.599659	147	7.20887	0.0940499	97	6.60908	0.0618469	XP_004931955.1	100000
TCONS_00041849	XLOC_030361	BMgn000424	chr22:7501641-7533121	0.442088	5e-05	0.0016115	yes	312	TCONS_00041849:260-1195	(+)	OK	6.07361	42.5185	2.80746	2.76866	0.0302	0.107178	no	elongation of very long chain fatty acids protein AAEL008004 isoform X1	3.43659	1.78098	2050	10.9707	0.065189	7045	12.7822	0.224028	XP_004931951.1	100000
TCONS_00041906	XLOC_030381	BMgn000403	chr22:8217896-8380297	0.53313	5e-05	0.0016115	yes	410	TCONS_00041906:920-2149	(+)	OK	0.795956	0.91118	0.195048	0.152067	0.7901	0.887525	no	uncharacterized protein LOC101741686	0.204716	-2.2883	3817	11.8356	0.0258834	781	9.60684	0.00529876	XP_021207519.1	99636
TCONS_00041941	XLOC_030395	BMgn016825	chr22:8831307-8865733	0.145386	0.0008	0.016461	yes	396	TCONS_00041941:109-1296	(+)	OK	17.0992	14.6805	-0.220029	-0.765197	0.1813	0.375396	no	uncharacterized protein LOC101740299	0.542381	-0.88262	3284	11.672	0.097525	1781	10.7981	0.0528958	XP_012550764.1	94177
TCONS_00042104	XLOC_030465	BMgn009976	chr22:14008455-14061806	0.382329	5e-05	0.0016115	yes	139	TCONS_00042104:3-419	(+)	OK	2.60646	8.61457	1.72469	2.12574	0.0004	0.00295249	yes	PDZ and LIM domain protein 3 isoform X6	0.200045	-2.3216	1471	10.3039	0.0528174	294	8.19538	0.0105659	XP_004926434.1	93023
TCONS_00042697	XLOC_030897	BMgn016900	chr23:2799472-2804574	0.120618	0.00075	0.0158808	yes	143	TCONS_00042697:1664-2092	(-)	OK	7.63877	3.87027	-0.980907	-2.53573	5e-05	0.000445332	yes	malate dehydrogenase 1, mitochondrial-like	0.969489	-0.0447029	1071	10.0645	0.609372	1038	10.0178	0.59078	XP_021203549.1	71014
TCONS_00042962	XLOC_031048	BMgn011562	chr23:11579249-11586054	0.22175	0.00075	0.0158808	yes	463	TCONS_00042962:396-1784	(+)	OK	6.97617	12.8911	0.88587	2.08143	0.00065	0.00455746	yes	cyclin dependent kinase 8	1.18519	0.245123	1427	10.4781	0.269054	1692	10.7251	0.318882	NP_001162054.2	100000
TCONS_00043196	XLOC_031161	BMgn011360	chr23:17556913-17582355	0.190575	0.0002	0.00524029	yes	693	TCONS_00043196:247-2325	(+)	OK	6.89121	3.0215	-1.18949	-3.36352	5e-05	0.000445332	yes	glycogen [starch] synthase	0.653019	-0.614804	1115	10.1197	0.0462717	728	9.50328	0.0302163	XP_004930739.1	100000
TCONS_00043271	XLOC_031189	-	chr23:19008169-19013470	0.389717	5e-05	0.0016115	yes	296	TCONS_00043271:823-1710	(-)	OK	0.240944	4.07928	4.08154	2.58545	0.0213	0.0816273	no	uncharacterized protein LOC105843014									XP_012549143.1	33333
TCONS_00043717	XLOC_031385	BMgn011476	chr23:10131099-10143985	0.399288	5e-05	0.0016115	yes	665	TCONS_00043717:1-1995	(+)	OK	0.954103	16.3977	4.10321	2.03027	0.0544	0.166593	no	probable serine/threonine-protein kinase DDB_G0280133 isoform X2	0.983787	-0.0235814	4893	12.2517	0.434268	4814	12.2328	0.427228	XP_004932654.1	100000
TCONS_00043803	XLOC_031423	BMgn011444	chr23:12468570-12493592	0.219229	0.0001	0.00286772	yes	691	TCONS_00043803:258-2330	(+)	OK	18.8233	19.6425	0.0614596	0.132694	0.8169	0.902201	no	arginine/serine-rich protein PNISR isoform X1	0.881061	-0.182687	2929	11.4989	0.169062	2580	11.3267	0.148954	XP_004932690.1	100000
TCONS_00043872	XLOC_031458	BMgn011312	chr23:15274550-15667444	0.363276	0.00065	0.0141754	yes	413	TCONS_00043872:373-1611	(+)	OK	5.65887	7.40073	0.387155	0.622824	0.25985	0.458164	no	DALR anticodon-binding domain-containing protein 3 isoform X2	1.69055	0.757496	101	6.67228	0.0486945	172	7.43084	0.0826526	XP_012549762.1	100000
TCONS_00044164	XLOC_031575	BMgn011128,BMgn011129	chr23:21906712-21957047	0.542084	5e-05	0.0016115	yes	626	TCONS_00044164:266-2143	(+)	OK	0.900465	4.48983	2.31792	4.64512	5e-05	0.000445332	yes	fatty acyl-CoA reductase 1-like	3.71864	1.89478	98	6.54572	0.00985107	366	8.51299	0.0366326	XP_004925977.1	100000
TCONS_00044213	XLOC_031597	BMgn011105	chr23:22873526-22961175	0.21125	0.0004	0.00958421	yes	427	TCONS_00044213:337-1617	(+)	OK	7.36037	19.4954	1.40528	3.89586	5e-05	0.000445332	yes	fasciclin-3 isoform X6	2.16268	1.11282	2008	10.9713	0.0253724	4343	12.082	0.0548725	XP_004926006.1	100000
TCONS_00044816	XLOC_032107	BMgn000144	chr24:7803715-7850243	0.314225	0.00275	0.0443164	yes	592	TCONS_00044816:126-1901	(+)	OK	3.91486	8.93372	1.1903	2.29384	0.00155	0.00966025	yes	mitogen-activated protein kinase kinase kinase kinase 5 isoform X2	1.20796	0.272575	1047	10.0328	0.0391453	1264	10.3038	0.047286	XP_012552949.1	100000
TCONS_00045065	XLOC_032222	BMgn017078	chr24:15047022-15054941	0.362269	5e-05	0.0016115	yes	133	TCONS_00045065:3163-3561	(-)	OK	0.621763	0.281843	-1.14147	-2.17792	0.0001	0.000847087	yes	uncharacterized protein LOC105842998 isoform X1	0.391304	-1.35364	14	3.91326	0.036379	5	2.40961	0.0126904	XP_004932858.1	67273
TCONS_00045548	XLOC_032400	BMgn009590	chr24:11158824-11193748	0.347777	0.00075	0.0158808	yes	1009	TCONS_00045548:179-3205	(+)	OK	15.2525	12.3994	-0.298781	-0.872667	0.13015	0.306645	no	insulin-degrading enzyme	0.860146	-0.217347	3251	11.6641	0.0975866	2796	11.4496	0.0839387	XP_004926345.1	100000
TCONS_00046296	XLOC_032869	BMgn000814	chr25:1050497-1081794	0.364803	0.0006	0.0132436	yes	1402	TCONS_00046296:213-4418	(+)	OK	5.44366	2.92203	-0.897608	-1.08375	0.0844	0.229321	no	bromodomain adjacent to zinc finger domain protein 1A	0.80545	-0.312134	1223	10.2539	0.0933557	985	9.94197	0.0751933	XP_021203374.1	99883
TCONS_00046327	XLOC_032879	BMgn004783	chr25:2297925-2331750	0.439461	0.00065	0.0141754	yes	771	TCONS_00046327:1-2310	(+)	OK	0.251169	0.968865	1.94764	1.57361	0.07025	0.200859	no	tubulin polyglutamylase ttll-4	1.45315	0.539185	196	7.61765	0.00732285	284	8.15225	0.0106412	XP_021209254.1	95046
TCONS_00046481	XLOC_032950	BMgn004902	chr25:6223272-6248999	0.316818	5e-05	0.0016115	yes	767	TCONS_00046481:287-2587	(+)	OK	4.73337	6.18298	0.385434	0.624219	0.26725	0.466624	no	transmembrane protein 245 isoform X1	0.664111	-0.590503	1913	10.9024	0.220354	1271	10.3116	0.14634	XP_021202593.1	99868
TCONS_00046585	XLOC_032990	BMgn004939	chr25:7006500-7017447	0.147005	0.0001	0.00286772	yes	928	TCONS_00046585:247-3030	(+)	OK	18.4846	30.7534	0.734427	2.29716	0.00015	0.0012229	yes	pre-mRNA-processing factor 39	1.20526	0.269343	3524	11.7793	0.332767	4247	12.0504	0.40107	XP_004924511.1	100000
TCONS_00046683	XLOC_033027	BMgn017164	chr25:9038490-9042307	0.263542	5e-05	0.0016115	yes	215	TCONS_00046683:303-947	(+)	OK	3.49685	7.32997	1.06775	1.84578	0.0043	0.0226041	yes	phosphatidylinositol N-acetylglucosaminyltransferase subunit H isoform X2	0.773463	-0.370596	721	9.49437	0.143483	558	9.12227	0.110978	XP_012545288.1	100000
TCONS_00046733	XLOC_033052	BMgn005049	chr25:10015475-10054172	0.187457	0.0001	0.00286772	yes	1857	TCONS_00046733:117-5687	(+)	OK	9.4937	6.58071	-0.528727	-1.50575	0.0088	0.0406895	yes	probable Rho GTPase-activating protein CG5521	0.855772	-0.224702	1320	10.3643	0.0603028	1129	10.1412	0.0516054	XP_021202849.1	100000
TCONS_00046795	XLOC_033072	BMgn005070	chr25:10839655-10855802	0.219162	0.0027	0.044096	yes	710	TCONS_00046795:144-2273	(+)	OK	4.8633	10.6189	1.12663	3.11648	5e-05	0.000445332	yes	protein O-mannosyl-transferase 2	1.71277	0.776328	251	7.96161	0.0339059	429	8.74791	0.058073	XP_004921812.1	100000
TCONS_00046867	XLOC_033102	BMgn004893,BMgn004894	chr25:13377688-13397938	0.139771	0.0003	0.00743265	yes	120	TCONS_00046867:187-546	(+)	OK	38.9054	26.9758	-0.528307	-1.16277	0.04165	0.137062	no	fau protein	0.661534	-0.596113	1147	10.099	0.732652	759	9.56801	0.484674	NP_001136224.1	100000
TCONS_00047312	XLOC_033287	BMgn005175	chr25:8418440-8444641	0.205972	0.00275	0.0443164	yes	212	TCONS_00047312:420-1055	(+)	OK	12.3941	14.339	0.210294	0.535704	0.35085	0.554653	no	synaptosomal-associated protein 25 isoform X3	1.22915	0.297658	4268	12.058	0.164173	5246	12.3542	0.201793	XP_004921882.1	100000
TCONS_00047534	XLOC_033370	BMgn005105	chr25:12380159-12456457	0.242557	0.0002	0.00524029	yes	1120	TCONS_00047534:235-3594	(+)	OK	2.21128	41.5578	4.23216	11.6574	5e-05	0.000445332	yes	putative epidermal cell surface receptor	24.0279	4.58664	239	7.728	0.0131167	5743	12.4779	0.315167	XP_012545022.1	100000
TCONS_00048237	XLOC_033819	BMgn010758	chr26:895199-906678	0.484618	5e-05	0.0016115	yes	1212	TCONS_00048237:194-3829	(+)	OK	4.15687	9.08741	1.12837	2.50541	0.0001	0.000847087	yes	biorientation of chromosomes in cell division protein 1-like 1 isoform X1	1.6197	0.695729	873	9.77064	0.144441	1414	10.4641	0.233951	XP_012551699.1	100000
TCONS_00048417	XLOC_033925	BMgn002246	chr26:8903338-8921926	0.248531	0.00255	0.0424068	yes	2200	TCONS_00048417:1-6600	(+)	OK	20.767	65.3389	1.65365	4.23234	5e-05	0.000445332	yes	uncharacterized protein LOC101747197	3.08364	1.62463	7405	12.8538	0.470197	22833	14.4768	1.44992	XP_012546962.1	99807
TCONS_00048493	XLOC_033969	BMgn000005	chr26:11953601-11977108	0.303279	5e-05	0.0016115	yes	406	TCONS_00048493:98-1315	(+)	OK	8.2626	3.83405	-1.10773	-2.08039	0.0005	0.00360706	yes	cytochrome P450 4g15-like	0.583968	-0.776039	744	9.54109	0.0534953	435	8.74559	0.0312395	XP_021203621.1	92402
TCONS_00049020	XLOC_034277	BMgn004531	chr27:13975222-14122857	0.227316	0.0001	0.00286772	yes	1150	TCONS_00049020:588-4037	(+)	OK	48.1279	16.3422	-1.55827	-5.49908	5e-05	0.000445332	yes	plasma membrane calcium-transporting ATPase 3 isoform X4	0.360705	-1.47111	12012	13.548	0.0813606	4333	12.0785	0.0293472	XP_004926068.1	100000
TCONS_00049066	XLOC_034300	BMgn013343	chr27:514663-538731	0.141454	0.00185	0.0325493	yes	1281	TCONS_00049066:169-4011	(+)	OK	12.8984	28.3532	1.13632	2.78636	5e-05	0.000445332	yes	protein transport protein Sec24C isoform X1	1.43906	0.525128	5043	12.2989	0.234323	7258	12.8251	0.337205	XP_012546208.1	98438
TCONS_00049280	XLOC_034382	-	chr27:11165282-11228578	0.251107	0.00105	0.0205597	yes	103	TCONS_00049280:898-1206	(-)	OK	1.18064	0.226348	-2.38296	-2.52474	0.0004	0.00295249	yes
TCONS_00049305	XLOC_034391	BMgn004615	chr27:12489790-12547252	0.217262	5e-05	0.0016115	yes	508	TCONS_00049305:312-1835	(+)	OK	38.4015	13.0958	-1.55206	-4.46615	5e-05	0.000445332	yes	facilitated trehalose transporter Tret1-like	0.440908	-1.18145	3026	11.5039	0.110261	1334	10.3809	0.0486149	XP_004926978.1	100000
TCONS_00049993	XLOC_034846	BMgn013901	chr28:2838874-2854237	0.131657	0.0003	0.00743265	yes	416	TCONS_00049993:1-1248	(+)	OK	17.4943	12.7315	-0.45848	-0.541907	0.3469	0.550676	no	protein NYNRIN isoform X2	1.05158	0.0725588	2953	11.5285	0.329356	3106	11.5977	0.346344	XP_004933563.1	100000
TCONS_00050703	XLOC_035280	BMgn008909	chr3:11572995-11578511	0.162702	5e-05	0.0016115	yes	131	TCONS_00050703:1209-1601	(+)	OK	12.4639	16.8043	0.431067	1.31312	0.02365	0.0885486	no	pre-mRNA-splicing regulator female-lethal(2)D	1.81707	0.861613	1008	9.97029	0.256013	1831	10.8391	0.465193	XP_004931734.1	100000
TCONS_00050795	XLOC_035320	BMgn009045,BMgn014916	chr3:14207742-14259911	0.277154	5e-05	0.0016115	yes	261	TCONS_00050795:160-942	(+)	OK	32.5632	17.1227	-0.927329	-1.81286	0.0059	0.0293364	yes	chloride intracellular channel isoform 1	0.188018	-2.41106	19718	14.2565	0.388081	3707	11.855	0.0729661	NP_001040533.1	100000
TCONS_00050865	XLOC_035342	BMgn009064	chr3:14892747-14897453	0.832305	5e-05	0.0016115	yes	173	TCONS_00050865:80-598	(+)	OK	2.47497e-05	1.68604	16.0559	0.00549794	0.21915	0.420539	no	uncharacterized protein LOC101746240	1.79688	0.84549	20	4.41031	0.00458888	37	5.18658	0.00842549	XP_012544310.2	100000
TCONS_00051263	XLOC_035503	BMgn009004	chr3:9778027-9783342	0.136031	0.00105	0.0205597	yes	560	TCONS_00051263:98-1777	(+)	OK	11.1551	10.6638	-0.0649869	-0.16836	0.75785	0.869061	no	myosin heavy chain, clone 203-like isoform X1	0.688713	-0.538024	1013	9.97373	0.420856	698	9.4481	0.289849	XP_004931770.1	100000
TCONS_00051381	XLOC_035557	BMgn008958	chr3:12235951-12283733	0.613766	0.00175	0.0310902	yes	963	TCONS_00051381:141-3029	(+)	OK	5.67693	2.42597	-1.22655	-2.93998	5e-05	0.000445332	yes	reversion-inducing cysteine-rich protein with Kazal motifs	0.569052	-0.813369	1002	9.94006	0.0209738	570	9.15727	0.0119352	XP_004931718.1	100000
TCONS_00051411	XLOC_035571	BMgn008949	chr3:12502288-12529118	0.432754	5e-05	0.0016115	yes	550	TCONS_00051411:133-1782	(+)	OK	3.76686	0.493877	-2.93114	-5.14414	5e-05	0.000445332	yes	centromere-associated protein E	0.260819	-1.93888	285	8.10202	0.0106224	74	6.2049	0.00277053	XP_004931700.1	100000
TCONS_00051435	XLOC_035582	BMgn008938	chr3:13234699-13257501	0.519348	5e-05	0.0016115	yes	364	TCONS_00051435:2564-3655	(-)	OK	1.26537	7.67273	2.60018	3.31478	5e-05	0.000445332	yes	trypsin-1-like	1.83663	0.877058	439	8.66621	0.113527	806	9.60286	0.208506	XP_021207349.1	100000
TCONS_00051913	XLOC_035923	BMgn014951	chr4:2324342-2327334	0.288484	5e-05	0.0016115	yes	428	TCONS_00051913:344-1627	(-)	OK	2.55118	5.16553	1.01775	1.73774	0.00795	0.0374943	yes	protein saal1	0.949495	-0.0747678	32	5.03728	0.0181406	30	4.93107	0.0171958	XP_004929180.1	100000
TCONS_00052100	XLOC_036022	BMgn006208	chr4:7986254-7999246	0.201544	5e-05	0.0016115	yes	515	TCONS_00052100:136-1680	(+)	OK	46.1077	79.7057	0.789673	1.78947	0.0043	0.0226041	yes	RNA-binding protein 39	1.09553	0.131628	6755	12.7118	0.892736	7401	12.8519	0.978019	XP_004929274.1	100000
TCONS_00052178	XLOC_036060	BMgn013561	chr4:10470203-10515779	0.274584	0.00025	0.00641197	yes	1169	TCONS_00052178:351-3857	(+)	OK	11.8104	10.8657	-0.120266	-0.231799	0.64675	0.799212	no	v-src sarcoma (Schmidt-Ruppin A-2) viral oncogene homolog isoform X3	0.135671	-2.88182	437	8.77137	0.424595	59	5.91484	0.0576052	XP_012546525.1	99401
TCONS_00052273	XLOC_036100	BMgn002977	chr4:12844419-12855530	0.328894	0.00155	0.0283673	yes	521	TCONS_00052273:198-1760	(+)	OK	3.69722	4.3074	0.220376	0.506676	0.37655	0.578935	no	CDK5 and ABL1 enzyme substrate 2 isoform X2	0.681548	-0.553114	896	9.80631	0.111291	611	9.25645	0.0758498	XP_012550084.1	100000
TCONS_00052499	XLOC_036194	BMgn003071	chr4:17109008-17179938	0.280495	0.0017	0.0304995	yes	1515	TCONS_00052499:333-4877	(+)	OK	9.7805	6.84171	-0.515551	-0.709516	0.20835	0.408503	no	patronin isoform X2	0.464413	-1.10652	11034	13.4283	0.161805	5124	12.3156	0.0751446	XP_021206813.1	93626
TCONS_00052564	XLOC_036222	BMgn003791	chr4:19678119-19691838	0.228789	0.0001	0.00286772	yes	262	TCONS_00052564:3-788	(+)	OK	3.90971	5.68511	0.540127	0.768078	0.1919	0.388272	no	uncharacterized protein LOC101739397 isoform X1	0.965121	-0.0512187	2638	11.3603	0.208874	2546	11.3089	0.201589	XP_004925831.1	100000
TCONS_00052630	XLOC_036245	BMgn006070	chr4:479627-499787	0.394214	5e-05	0.0016115	yes	535	TCONS_00052630:1-1605	(+)	OK	2.23423	2.47253	0.146214	0.235616	0.6604	0.808046	no	thioredoxin domain-containing protein 3 homolog	7.07143	2.822	4	1.79744	0.000499206	32	5.04395	0.00435671	XP_012548339.1	95699
TCONS_00052938	XLOC_036383	BMgn005936	chr4:8023849-8035996	0.2063	5e-05	0.0016115	yes	585	TCONS_00052938:94-1848	(+)	OK	17.4194	13.6038	-0.356687	-1.01165	0.07995	0.220938	no	2',5'-phosphodiesterase 12	0.859217	-0.218906	1286	10.327	0.141828	1105	10.1106	0.121861	XP_004929279.1	100000
TCONS_00053297	XLOC_036528	-	chr4:15355757-15358665	0.203894	0.00015	0.00417023	yes	136	TCONS_00053297:301-705	(+)	OK	19.3243	25.9105	0.42312	0.970587	0.09255	0.245041	no	elongation factor Ts									NP_001040359.1	99259
TCONS_00053926	XLOC_036959	BMgn002619	chr5:6969881-6973869	0.207081	0.00255	0.0424068	yes	266	TCONS_00053926:600-1397	(+)	OK	35.8475	35.6433	-0.00824268	-0.0217027	0.9709	0.98152	no	uncharacterized protein LOC101738363	1.03388	0.0480677	3562	11.7962	0.948261	3682	11.8454	0.980387	XP_004932437.1	100000
TCONS_00053977	XLOC_036979	BMgn002639	chr5:8188693-8203922	0.397849	5e-05	0.0016115	yes	680	TCONS_00053977:281-2320	(+)	OK	15.5564	56.5742	1.86264	4.74192	5e-05	0.000445332	yes	aspartyl/asparaginyl beta-hydroxylase isoform X6	1.35461	0.437881	4903	12.226	0.321952	6642	12.6927	0.43612	XP_012551145.1	97574
TCONS_00053988	XLOC_036984	BMgn002643	chr5:8260146-8303710	0.592937	5e-05	0.0016115	yes	939	TCONS_00053988:297-3113	(+)	OK	17.6042	4.61948	-1.93011	-4.30923	5e-05	0.000445332	yes	phosphatidate phosphatase LPIN2 isoform X2	0.391271	-1.35376	6423	12.6367	0.220362	2513	11.2905	0.0862211	XP_004932325.1	99243
TCONS_00054136	XLOC_037029	BMgn003480	chr5:11600525-11613278	0.285175	5e-05	0.0016115	yes	892	TCONS_00054136:178-2853	(+)	OK	15.401	24.4195	0.665006	1.73949	0.00235	0.0136971	yes	serrate RNA effector molecule homolog isoform X2	1.54684	0.629324	3893	11.9214	0.318445	6021	12.5561	0.492583	XP_012549286.1	100000
TCONS_00054177	XLOC_037042	BMgn003492	chr5:12218408-12232169	0.295142	0.003	0.0477118	yes	550	TCONS_00054177:3-1652	(+)	OK	15.595	4.00548	-1.96104	-1.64091	0.01435	0.0599478	no	F-box/LRR-repeat protein 14-like	0.531915	-0.910733	2084	11.016	0.617017	1108	10.1155	0.328201	XP_004930163.3	100000
TCONS_00054340	XLOC_037111	BMgn003549	chr5:15498710-15502409	0.264542	5e-05	0.0016115	yes	402	TCONS_00054340:201-1406	(+)	OK	16.1447	19.2316	0.252416	0.490428	0.34855	0.55265	no	mitochondrial translational release factor 1	0.75953	-0.396821	1731	10.7561	0.7437	1315	10.3615	0.564863	NP_001040455.1	99501
TCONS_00054530	XLOC_037192	BMgn005774,BMgn005775	chr5:20599962-20640554	0.382182	0.00085	0.0172944	yes	438	TCONS_00054530:916-2229	(+)	OK	14.8186	6.31448	-1.23067	-2.12848	0.0022	0.0129871	yes	DNA-binding protein Ewg isoform X5	0.828575	-0.271296	2860	11.4791	0.439781	2370	11.2027	0.364391	XP_021202119.1	98186
TCONS_00054815	XLOC_037305	BMgn002679	chr5:6251108-6258173	0.391082	5e-05	0.0016115	yes	192	TCONS_00054815:231-806	(+)	OK	11.9536	8.70792	-0.457045	-1.11253	0.0558	0.169562	no	dual specificity protein phosphatase 13 isoform B-like isoform X2	0.373637	-1.42029	4066	11.9871	0.787134	1519	10.5693	0.294102	XP_004932361.1	100000
TCONS_00054933	XLOC_037352	BMgn003752	chr5:9622981-9634498	0.158648	0.00045	0.0104389	yes	172	TCONS_00054933:119-634	(+)	OK	9.40704	16.8477	0.840735	2.15043	0.0002	0.00158944	yes	rab11 family-interacting protein 1	1.35304	0.436202	1821	10.8312	0.467488	2464	11.2671	0.632529	XP_012549325.1	100000
TCONS_00055083	XLOC_037413	BMgn003709	chr5:12010600-12054414	0.639893	5e-05	0.0016115	yes	699	TCONS_00055083:76-2172	(+)	OK	5.81421	13.5996	1.22591	3.73536	5e-05	0.000445332	yes	very long-chain-fatty-acid--CoA ligase bubblegum isoform X1	1.97678	0.983154	1608	10.6424	0.0446357	3179	11.6328	0.088235	XP_004930169.1	100000
TCONS_00055246	XLOC_037471	BMgn003663	chr5:14388235-14399178	0.333905	0.0015	0.0280154	yes	169	TCONS_00055246:151-657	(+)	OK	7.79071	16.502	1.08281	1.54994	0.0116	0.0507826	no	methionine aminopeptidase 1D, mitochondrial isoform X2	1.03223	0.045761	2110	11.0434	0.304429	2178	11.0889	0.31424	XP_004930097.1	99355
TCONS_00055427	XLOC_037526	BMgn003609	chr5:17098742-17100607	0.100088	0.00165	0.029749	yes	176	TCONS_00055427:311-838	(+)	OK	111.593	21.477	-2.37737	-7.88088	5e-05	0.000445332	yes	adenylate kinase isoenzyme 6 homolog	0.230686	-2.116	2761	11.4285	1.5114	637	9.31621	0.348659	XP_004930023.1	100000
TCONS_00055442	XLOC_037534	BMgn003602	chr5:17462104-17480456	0.225991	5e-05	0.0016115	yes	633	TCONS_00055442:2884-4782	(+)	OK	7.8679	10.6646	0.438776	1.18408	0.0417	0.137167	no	U2 snRNP-associated SURP motif-containing protein	0.88435	-0.17731	2562	11.3234	0.187593	2266	11.1463	0.165898	XP_012549208.1	100000
TCONS_00056154	XLOC_038002	BMgn006501	chr6:7931156-7943341	0.200512	0.0002	0.00524029	yes	849	TCONS_00056154:3152-5698	(+)	OK	13.1304	18.2809	0.477421	0.946493	0.10115	0.260466	no	uncharacterized protein LOC101743946	0.770246	-0.376609	10105	13.2507	1.01978	7783	12.7628	0.785481	XP_021206546.1	100000
TCONS_00056191	XLOC_038022	BMgn006517	chr6:8900300-8981359	0.295084	5e-05	0.0016115	yes	1570	TCONS_00056191:152-4858	(+)	OK	6.31309	10.5396	0.739406	0.920219	0.1124	0.279837	no	protein lap4 isoform X8	0.362406	-1.46432	11156	13.4432	0.282545	4043	11.9761	0.102396	XP_021207461.1	32.168
TCONS_00056240	XLOC_038037	BMgn006531	chr6:10047609-10124042	0.29736	5e-05	0.0016115	yes	345	TCONS_00056240:283-1317	(+)	OK	52.0461	19.2536	-1.43466	-3.41315	5e-05	0.000445332	yes	protein held out wings isoform X1	0.389637	-1.3598	1486	10.5282	0.604311	579	9.17831	0.235462	XP_004930624.1	100000
TCONS_00056312	XLOC_038073	BMgn006297	chr6:13797846-13821552	0.561233	5e-05	0.0016115	yes	473	TCONS_00056312:330-1748	(+)	OK	6.94482e-05	4.22712	15.8934	0.045738	0.24635	0.446342	no	kal-1 protein isoform X1	9.54787	3.25518	63	5.95746	0.00264628	598	9.21667	0.0252664	XP_012553262.1	100000
TCONS_00056318	XLOC_038074	BMgn006298	chr6:13822535-13838015	0.257088	5e-05	0.0016115	yes	381	TCONS_00056318:1-1143	(+)	OK	4.93515	11.3551	1.20217	2.18779	0.00035	0.00262811	yes	peripheral plasma membrane protein CASK	2.14511	1.10105	423	8.71902	0.0282116	907	9.82378	0.0605171	XP_021201856.1	100000
TCONS_00056360	XLOC_038092	BMgn006314,BMgn006317	chr6:14788830-15014449	0.163334	0.0024	0.0406549	yes	465	TCONS_00056360:1-1395	(+)	OK	100.502	76.305	-0.397381	-0.688955	0.2245	0.426137	no	uncharacterized protein LOC101740768	0.793475	-0.333743	6498	12.6519	4.65806	5156	12.3267	3.69606	XP_004923549.1	100000
TCONS_00056608	XLOC_038209	BMgn013613	chr6:2867014-2899373	0.500107	5e-05	0.0016115	yes	458	TCONS_00056608:288-1661	(+)	OK	0.373198	7.72164	4.37089	1.80433	0.23015	0.432016	no	F-box only protein 9	1.95633	0.968149	450	8.81737	0.0505822	881	9.78289	0.0989554	XP_004925255.1	100000
TCONS_00056742	XLOC_038278	BMgn006378	chr6:7878888-7887202	0.301747	5e-05	0.0016115	yes	334	TCONS_00056742:155-1156	(+)	OK	17.1491	18.6543	0.12138	0.247126	0.63955	0.794543	no	LIM and senescent cell antigen-like-containing domain protein 1 isoform X1	0.377216	-1.40654	4532	12.1451	0.77489	1710	10.7345	0.292301	XP_004930586.1	100000
TCONS_00056897	XLOC_038352	BMgn006275	chr6:15014550-15022574	0.379025	5e-05	0.0016115	yes	173	TCONS_00056897:97-615	(+)	OK	8.27939	20.7597	1.32619	4.50457	5e-05	0.000445332	yes	GK12989	0.604567	-0.726027	1007	9.97027	0.59996	609	9.24933	0.362716	XP_004923550.1	100000
TCONS_00057725	XLOC_038995	BMgn010273	chr7:10247938-10355984	0.291223	0.00265	0.0438695	yes	1503	TCONS_00057725:654-5162	(+)	OK	6.914	7.41077	0.100103	0.212724	0.709	0.840517	no	trithorax group protein osa	1.07653	0.106391	2426	11.2434	0.133348	2612	11.3497	0.143553	XP_021207056.1	98611
TCONS_00057740	XLOC_039001	BMgn010279	chr7:10487746-10616664	0.28706	0.0006	0.0132436	yes	2158	TCONS_00057740:56-6529	(+)	OK	3.57231	5.20558	0.543199	0.770175	0.17765	0.371538	no	tight junction protein ZO-1 isoform X6	1.31665	0.396875	5955	12.54	0.0462108	7841	12.9356	0.0608436	XP_012550289.1	100000
TCONS_00057753	XLOC_039006	BMgn010283	chr7:10670576-10694965	0.29132	0.003	0.0477118	yes	775	TCONS_00057753:171-2495	(+)	OK	11.9308	7.7759	-0.617605	-0.850728	0.1422	0.324742	no	septin and tuftelin interacting protein isoform X2	1.2398	0.310108	801	9.64549	0.0573543	993	9.95627	0.0711079	XP_012550229.1	100000
TCONS_00057906	XLOC_039077	BMgn008650	chr7:15697812-15707738	0.30175	5e-05	0.0016115	yes				OK	25.5953	24.4533	-0.0658476	-0.222993	0.6975	0.833256	no	cyclin-dependent kinases regulatory subunit	1.32383	0.404722	1450	10.5016	0.642878	1920	10.9045	0.851064	XP_004927069	100000
TCONS_00057946	XLOC_039102	BMgn010025,BMgn010026	chr7:1465481-1671013	0.368754	0.0003	0.00743265	yes	1300	TCONS_00057946:243-4142	(+)	OK	8.05776	5.77972	-0.47938	-1.18317	0.0424	0.138859	no	LIM domain only protein 7 isoform X3	1.28335	0.35992	262	8.03879	0.0524982	337	8.39648	0.0673738	XP_012553061.1	98558
TCONS_00057966	XLOC_039108	BMgn010018	chr7:2068446-2106212	0.37623	0.0002	0.00524029	yes	932	TCONS_00057966:171-2966	(+)	OK	4.63033	6.9335	0.582469	1.55525	0.0067	0.032653	yes	C2 domain-containing protein 5	1.15818	0.21186	2088	11.0275	0.0569245	2419	11.2393	0.0659289	XP_004923298.1	100000
TCONS_00058123	XLOC_039177	BMgn010143	chr7:7995681-7997070	0.26246	0.00095	0.0190104	yes	195	TCONS_00058123:47-631	(+)	OK	1.60292	1.14282	-0.488101	-0.749004	0.1979	0.395338	no	cuticular protein RR-2 motif 70 precursor	0.598131	-0.741467	35	5.14162	0.0267078	20	4.23894	0.0156651	NP_001166689.1	100000
TCONS_00058258	XLOC_039236	BMgn008617	chr7:12849937-12865617	0.216102	0.00035	0.00855503	yes	958	TCONS_00058258:3504-6377	(+)	OK	0.84527	0.971834	0.201299	0.355136	0.53345	0.715335	no	ATP-dependent DNA helicase PIF1-like	0.620915	-0.687532	204	7.67831	0.0487805	127	6.99039	0.0302885	XP_004927109.3	100000
TCONS_00058677	XLOC_039562	-	chr8:790746-822524	0.283517	5e-05	0.0016115	yes	184	TCONS_00058677:431-982	(+)	OK	4.03862	2.36548	-0.771731	-1.54504	0.0097	0.0439486	yes	importin subunit alpha-2 isoform X1									XP_004925377.1	100000
TCONS_00058701	XLOC_039577	BMgn014268	chr8:1146259-1151398	0.201826	0.00095	0.0190104	yes	285	TCONS_00058701:1-855	(+)	OK	10.4237	7.91695	-0.396851	-0.665192	0.25195	0.450278	no	forkhead box protein J2-like	0.923676	-0.114541	642	9.32817	0.147451	593	9.20994	0.136197	XP_004925401.1	100000
TCONS_00058906	XLOC_039667	BMgn005424	chr8:8123180-8161395	0.219272	0.00155	0.0283673	yes	523	TCONS_00058906:301-1869	(+)	OK	4.58191	5.24108	0.193915	0.547352	0.33835	0.541429	no	facilitated trehalose transporter Tret1	1.27629	0.351957	349	8.42414	0.0587278	445	8.79068	0.0749537	XP_004932093.1	100000
TCONS_00058971	XLOC_039697	BMgn005452	chr8:9438053-9531236	0.138654	0.0001	0.00286772	yes	421	TCONS_00058971:120-1382	(+)	OK	113.961	37.3592	-1.60901	-3.39883	5e-05	0.000445332	yes	ribosome biogenesis protein WDR12 homolog	0.394221	-1.34292	5872	12.5177	1.02609	2315	11.1763	0.404508	XP_004932125.1	100000
TCONS_00059019	XLOC_039720	BMgn005470	chr8:10722207-10729040	0.145704	5e-05	0.0016115	yes	1185	TCONS_00059019:163-3717	(+)	OK	18.8552	29.513	0.646389	2.40945	5e-05	0.000445332	yes	protein suppressor of sable isoform X2	1.30288	0.381707	1295	10.3231	0.711722	1688	10.7191	0.927289	XP_012550976.1	100000
TCONS_00059038	XLOC_039725	BMgn005475	chr8:11164251-11177046	0.176558	0.0001	0.00286772	yes	547	TCONS_00059038:171-1811	(+)	OK	150.068	105.596	-0.50706	-1.35207	0.0236	0.0884166	no	uncharacterized protein LOC101741832	0.445341	-1.16702	22217	14.4184	1.74276	9894	13.2715	0.776122	XP_004932167.1	100000
TCONS_00059149	XLOC_039773	BMgn005517	chr8:12855528-12878054	0.528413	0.0022	0.0377943	yes	426	TCONS_00059149:390-1667	(+)	OK	1.24925	0.255095	-2.29196	-1.47017	0.0754	0.211704	no	Uncharacterized protein	0.532675	-0.908673	439	8.77949	0.105984	234	7.87309	0.0564549	XP_021207629.1	100
TCONS_00059151	XLOC_039773	BMgn005517,Bmgn015436	chr8:12855528-12878054	0.548468	5e-05	0.0016115	yes	216	TCONS_00059151:1-648	(+)	OK	10.4207	4.8007	-1.11814	-1.4259	0.01655	0.0670076	no	Uncharacterized protein	0.532675	-0.908673	439	8.77949	0.105984	234	7.87309	0.0564549	XP_021207628.1	100000
TCONS_00059160	XLOC_039777	BMgn015440	chr8:12983045-13007406	0.197521	5e-05	0.0016115	yes	1208	TCONS_00059160:179-3802	(+)	OK	22.1964	14.317	-0.632591	-2.17526	0.0004	0.00295249	yes	protein flightless-1	0.817858	-0.290078	4118	12.0065	0.179936	3368	11.7171	0.147163	XP_004932247.1	100000
TCONS_00059250	XLOC_039817	BMgn009885	chr8:17049084-17059748	0.294274	5e-05	0.0016115	yes	503	TCONS_00059250:1-1509	(+)	OK	103.827	30.5362	-1.76558	-4.58897	5e-05	0.000445332	yes	probable ATP-dependent RNA helicase DDX47	0.472233	-1.08243	5258	12.3578	0.655775	2483	11.2782	0.309678	XP_004923655.1	100000
TCONS_00059330	XLOC_039846	BMgn009917	chr8:18462296-18496631	0.31003	0.00305	0.0482961	yes	256	TCONS_00059330:1-765	(-)	OK	8.78716	2.97534	-1.56234	-2.23464	0.0023	0.0134686	yes	Histone deacetylase 4	0.373359	-1.42136	3759	11.8565	0.210688	1403	10.4537	0.0786622
TCONS_00059409	XLOC_039896	BMgn014226	chr8:1437585-1457560	0.514677	0.00015	0.00417023	yes	983	TCONS_00059409:113-3061	(+)	OK	1.09665	5.14144	2.22907	0.146316	0.22805	0.430015	no	myosin heavy chain, muscle	0.0740516	-3.75532	17056	13.5063	2.72673	1263	10.2966	0.201918	XP_021203147.1	98596
TCONS_00059427	XLOC_039902	BMgn014117	chr8:2250311-2260816	0.149452	0.00255	0.0424068	yes	245	TCONS_00059427:154-888	(+)	OK	14.9626	11.6688	-0.3587	-0.627485	0.26935	0.468625	no	dullard-like protein isoform X1	1.24868	0.320405	1832	10.8342	0.210516	2288	11.1604	0.262868	XP_012545014.1	100000
TCONS_00059602	XLOC_039985	BMgn005370	chr8:8343786-8386976	0.245679	0.00155	0.0283673	yes	529	TCONS_00059602:138-1724	(+)	OK	6.33306	2.30565	-1.45773	-1.67395	0.00835	0.0390001	yes	cell cycle checkpoint kinase 2	0.596389	-0.745673	517	9.00538	0.0803044	308	8.27049	0.0478927	NP_001036936.1	99367
TCONS_00059701	XLOC_040032	BMgn005323	chr8:11588827-11591251	0.110841	0.0008	0.016461	yes	255	TCONS_00059701:104-868	(+)	OK	414.278	400.271	-0.0496243	-0.162596	0.7765	0.880204	no	ALY	0.774262	-0.369106	19152	14.2183	7.86853	14829	13.8546	6.0923	NP_001037596.1	100000
TCONS_00059738	XLOC_040045	BMgn005310	chr8:11877349-12084106	0.681261	5e-05	0.0016115	yes	859	TCONS_00059738:959-3535	(+)	OK	0.215418	28.8257	7.06407	9.87153	5e-05	0.000445332	yes	matrix metalloproteinase-14-like	39.2956	5.29629	68	6.07435	0.00604491	2659	11.3751	0.237538	XP_004932298.1	100000
TCONS_00059766	XLOC_040065	BMgn005292	chr8:12919923-12976081	0.233606	0.001	0.0197935	yes	473	TCONS_00059766:362-1780	(+)	OK	24.1615	24.191	0.00176217	0.00427727	0.9943	0.99563	no	inositol hexakisphosphate kinase 2	1.1167	0.159237	6538	12.6718	0.116483	7301	12.8291	0.130077	XP_021207548.1	100000
TCONS_00059799	XLOC_040079	BMgn009811	chr8:14504472-14517383	0.218359	5e-05	0.0016115	yes	260	TCONS_00059799:184-963	(+)	OK	10.5459	13.052	0.307585	1.00318	0.0846	0.229718	no	E3 ubiquitin-protein ligase RNF25	1.91625	0.938287	334	8.38621	0.064668	641	9.32454	0.12392	XP_012546851.1	100000
TCONS_00059864	XLOC_040102	BMgn009854	chr8:17061370-17082624	0.291044	5e-05	0.0016115	yes	644	TCONS_00059864:453-2384	(+)	OK	9.65172	29.9763	1.63496	5.28209	5e-05	0.000445332	yes	CCR4-NOT transcription complex subunit 3 isoform X2	3.08809	1.62672	904	9.81981	0.0692392	2793	11.4455	0.213817	XP_004923656.1	100000
TCONS_00059935	XLOC_040131	BMgn009824	chr8:18672458-18715363	0.484047	5e-05	0.0016115	yes	561	TCONS_00059935:173-1855	(+)	OK	0.0536726	1.41613	4.72162	1.46925	0.2119	0.412574	no	uncharacterized protein LOC101745460 isoform X2	0.349693	-1.51584	272	8.08317	0.0929728	95	6.58388	0.032512	XP_012553426.1	100000
TCONS_00060332	XLOC_040465	BMgn008111	chr9:5275864-5282235	0.238733	5e-05	0.0016115	yes	258	TCONS_00060332:142-915	(+)	OK	9.0306	11.7701	0.38223	1.11145	0.0547	0.167187	no	uncharacterized protein LOC101735997	0.89705	-0.15674	1107	10.1136	0.173808	993	9.95726	0.155915	NP_001266349.1	99541
TCONS_00060341	XLOC_040469	BMgn008114	chr9:5627833-5713626	0.332109	5e-05	0.0016115	yes	1669	TCONS_00060341:309-5315	(+)	OK	1.50817	3.56964	1.24298	2.38865	0.00025	0.00193946	yes	uncharacterized protein LOC101737722	1.25011	0.322059	737	9.51968	0.0849666	921	9.84273	0.106218	XP_012545390.1	100000
TCONS_00060464	XLOC_040526	BMgn012462	chr9:10278075-10288369	0.307241	5e-05	0.0016115	yes	347	TCONS_00060464:564-1604	(+)	OK	6.62605	6.82377	0.0424194	0.0619241	0.91605	0.955078	no	molybdenum cofactor sulfurase	0.926966	-0.109411	2551	11.3165	0.522172	2365	11.2058	0.484036	NP_001106746.1	98834
TCONS_00060662	XLOC_040612	BMgn002509	chr9:15562958-15645288	0.160149	0.0014	0.0266953	yes	392	TCONS_00060662:3-1178	(+)	OK	18.2609	26.5054	0.537525	1.32828	0.0249	0.0921574	no	tropomodulin-1 isoform X2	0.780462	-0.357599	4484	12.1305	0.0413993	3499	11.7727	0.0323106	XP_012550186.1	100000
TCONS_00060969	XLOC_040771	BMgn012560	chr9:7520231-7539316	0.180284	0.0001	0.00286772	yes	355	TCONS_00060969:114-1178	(+)	OK	62.3398	43.6308	-0.514807	-1.01215	0.0791	0.219398	no	glycerol-3-phosphate dehydrogenase-1 isoform X1	0.645933	-0.630544	8880	13.1115	0.685424	5736	12.4839	0.442738	XP_012545027.1	100000
