# Supplementary material for: Refining a steroidogenic model: an analysis of RNA-seq datasets from insect prothoracic glands
Source: BMC Genomics. 2018 Jul 13;19:537. doi: 10.1186/s12864-018-4896-2 (PMC6045881; doi:10.1186/s12864-018-4896-2)
Supplement: Supplementary file 6 — Table S6. Tabulation of 98 unique differentially spliced loci based on the TransDecoder and Cufflinks output. Data from Additional file 5: Table S5 was manually annotated to filter out duplicate entries based on locus and protein sequence. In cases where a gene model was included between the test ID coordinates (Column C), this is indicated using the nomenclature of KAIKObase (http://sgp.dna.affrc.go.jp/KAIKObase/) or it is left empty. Each test was annotated with its corresponding data from the Bowtie2 output [28] (columns R to Y) and the results of the Blastp analysis against the Bombyx mori protein reference sequences (NCBI annotation release 102) (columns Z and AA). (XLSX 131 kb) [file 12864_2018_4896_MOESM6_ESM.xlsx]

## Sheet: Sheet1
Test ID	Gene ID	Bombyx mori gene name	Locus	Transdecoder-calculated protein length	Test ID coordinates	Strand	Protein Sequence	Status	Cufflinks value:Day 0 of the 5th instar	Cufflinks value:Day 6 of the 5th instar	Cufflinks:log2 fold change between Day 6 vs Day 0	Test statistics	p value	q value	Significant fold change between Day 0 and Day 6	Protein description	natural_normalized_fold_change_Day 0_vs_Day 6	log2_normalized_fold_change_Day 0_vs_Day 6	natural_normalized_mean_counts_Day 0	log2_normalized_mean_counts_Day 0	rpgm_normalized_mean_counts_Day 0	natural_normalized_mean_counts_Day 6	log2_normalized_mean_counts_Day 6	rpgm_normalized_mean_counts_Day 6	GenBank best hit	Similarity %
TCONS_00010335	XLOC_009481	BMgn001338	Bm_scaf313:11264-26041	526	TCONS_00010335:2-1579	(+)	LFFFQTIMRCLGLLFFLVCVVTSARAYHVLCVFPIPSRSHNSLGKGIVDALLEAGHEVTWVTPYPPSELAKGLKIVDVSATVSISKTVDMHEQRNSNTGVSFVKALAENITRVSLATPALQQAIVQGKYDAVITETFFNDAEAGYGAVLQVPWILMSSIAMMPQLEAIVDEVRSVTTIPLLFNNAPTPMGFWDRLKNVFLHSVMVISDWLDRPKTVAFYESLFAPLATARGVALPPFEEALYNVSVLLVNSHPAFAPPLSLPPNVVEIAGYHIDPKTPPLPKDLQSILDSSPQGVVYFSMGSVLKSSKLSEQTRRELLDVFGSIPQTVLWKFEEDLQDLPKNVHIRSWMPQSSILAHPNMKVFITHGGLLSILETLHYGVPILAVPVFGDQPSNANSAV…	OK	2.08889	25.3672	3.60216	7.64337	5e-05	0.000445332	yes	UDP-glycosyltransferase UGT41A1 precursor	9.14236	3.19257	96	6.59589	0.0140371	878	9.77562	0.128333	NP_001243993	100000
TCONS_00012938	XLOC_011955	BMgn014521	Bm_scaf424:22862-28710	737	TCONS_00012938:1394-3604	(+)	MNNPALRHISAGLSLPEVSSTYTEIDVDRCRSYDCTECCTDNCSSVSTCCSCKATEHTDDNTSCKTTPVQIKQNLKSKEKKVDKEKADSCHNNDTEHDIMKNNLVEMNAKLVNTSELLKERLQELEGEIEIFRKENSNLAKLREDIDLERQKFYQEKAAFEQKFNEEKILSEYYLAEEKEKLTKQKQMYERNIREIRGRFSKKEKDEVINLKKEIESLKEEIRVKDAKSTSTIARLRNQIKIIEKEKKDKETTIEKLKKENKRIQHSNDITRRLSNMKYLAEINKKLKNVNPKDIRSEPDLDDDAKYKDFEIERQSRNKTAPIAKSNTRQRAKSVPNLNVSSAYAKYFSQRDALSQIEQNRTLNKDKINISYSDNDNDLEELEDEQVSDIQDNPNEKSN…	OK	0.471635	1.6232	1.7831	2.11978	0.00245	0.0141615	yes	centromere protein J	1.41614	0.501963	211	7.71279	0.0435352	298	8.22359	0.0616519	XP_004933797	100000
TCONS_00015866	XLOC_014785	-	Bm_scaf623:1-12295					OK	9.20356	1.81743	-2.34029	-4.85414	5e-05	0.000445332	yes
TCONS_00019683	XLOC_018479	BMgn002107	chr1:2212376-2297942	788	TCONS_00019683:1-2364	(+)	MIIRHVVCHLVYKAVESEEESEEESSDEEVSSATEVSTDSEFAREETAPVPSLPAILVTEATPPAPPPPQDYPLSRTRSAGGLATKRALELKRKYLLGEPSPPAVRKSDSTSQIDNKFEAFRSTITEFQKLLHPAPVSSIAQPQKPIVSFQTADGDIKPQPMPDIIKNLCNDAPVDLLTKIDSPLCKDWSSDTLHEGNKGRLDLESDSLSEDSSHTATAPNQAVPRVEVHDEGGELIQLDSLMLVNSCTEDNDEKVSAAATVTGPTVVAAESESSESCRDATTLALTETELSDWAAESGVLDDCGFDEKDDRKRSKNPRTLSGPKLVHEAKNISAVASHVCGKTSPTEPVVYSNALEHFEFADEGEQDPSLESPLTPKNYGYMELVDDDYAYSPSKDRS…	OK	3.76378	14.69	1.96458	2.91779	5e-05	0.000445332	yes	protein-methionine sulfoxide oxidase Mical isoform X4	3.47939	1.79884	679	9.40586	0.0748577	2364	11.1995	0.260459	XP_012551501	98723
TCONS_00019900	XLOC_018569	BMgn000647	chr1:8515520-8526162	597	TCONS_00019900:182-1972	(+)	MRLLVTIGCMIVFLHCSYAPPVTPDKSEDSEIKDDLEEYMEYHRYLKEVVQALESDPDFRERLEKADEEDVKSGKIAEQLDFVNHNVRTRLDEIKRRELERLRHLATKQFELTNDLHVNMGKVPSSEHLDHTNAHTFEIEDLKKLIMKTTSDLEAADKKRREEFKTYEIQKEFEKHQKMEEMGDNKEYLEKIKEEEEAKKHHKPLHHPGSKQQLEEVWEKQDHMDQQFDPKVFFMMHDVDGNGVWDANEVKALFVKELDKFYGPGGPNKDLHERAEEMERMREHVFKENDKNHDGLIDFHEFMMATQRADFNQDEGWKPIEENQVYTQAEYQEYERRKLEEIRYLQQRGLVDPHGRPLPGSQHQIHQALQEFYAHQQHQGYPAQQQYQQPQHQGQAQYY…	OK	37.808	59.5497	0.655401	2.2883	0.0002	0.00158944	yes	nucleobindin-2 isoform X2	1.0616	0.0862425	812	9.66328	1.82808	862	9.74539	1.94069	XP_004929827	100000
TCONS_00020085	XLOC_018662	BMgn000715	chr1:11639584-11663553	423	TCONS_00020085:214-1482	(+)	MNPLAQIVRATRPIYRKLSTTATTASAAKPIPTTGFCFELTDEQKALQELARKFTKDEIIPVAGQYDKTGEYPWPVVKKAWEVGLMNGHIPEHCGGMDMGVFDGCLVAEELAYGCTGIMTAMEASGLGQTPIIIAGNKEQQKKYLGRLIDEPLVAAYGVTEPGAGSDVAGIKTRAEKKGDEWILNGQKMWITNGGVANWYFVLARTNPDPKCPASKAFTGFIVEREWPGVTPGRKEQNMGQRASDTRGITFEDVRIPKENVLIGEGAGFKIAMGAFDKTRPPVAAGATGLAQRALHEATKYSLERKTFGVPIARHQAVAFMLADMAIGVETARIAWQRAAWMVDHGQKNTVMASVAKCHASEIANKAATDAVQVFGGNGFNTEYPVEKLMRDAKIYQIY…	OK	95.1875	147.308	0.629992	1.92328	0.00135	0.0086237	yes	probable medium-chain specific acyl-CoA dehydrogenase, mitochondrial isoform X2	2.16215	1.11247	8001	12.9635	0.334155	17299	14.0737	0.722494	XP_004929915	100000
TCONS_00020604	XLOC_018896	BMgn002002	chr1:4636163-4695722	474	TCONS_00020604:328-1749	(+)	MVQCHPPLEIEELPKEDEERLEKLFSKLDHDGNGKIDIHDLSVALKELAPHINRSYAEKFLAKSGWKVAGDVTLSEFIHYVREHEKNLRLQFKHLDRNQDGKVDLEELISAFADLGIAIGRNEAMNLLKRMDQDGSLNISYDEWRDYLLLAPATDIHALIHFWRHSTYLDIGEDMNVPDDFTQSELQTGKWWRHLLAGGIAGAVSRTCTAPLDRLKVFLQVNTTRENMRKCLAKMLNEGGITGMWRGNGINVIKIAPESAIKFAAYEQVKRLIKGERSNHPLEIHERFIAGATAGAISQTVIYPLEVLKTRLALRKTGQYSGIADAARKIYAREGLRCFYKGYIPNILGIVPYAGIDLAVYETLKKKYISKYQAHNEQPGILLLLACGSISCTLGQVCS…	OK	10.6027	4.018	-1.39988	-4.12145	5e-05	0.000445332	yes	calcium-binding mitochondrial carrier protein SCaMC-2 isoform X1	0.288088	-1.79542	1304	10.3157	0.155405	376	8.55386	0.0447702	XP_004932845	99353
TCONS_00020688	XLOC_018922	BMgn000584	chr1:6877150-6903715	304	TCONS_00020688:25-936	(+)	MKSDGDENPKHETKSPPPISSDVAVVDDRIMAVATQAASSTPISQLNVTKSSRVHIGPKFISVTQTVRNTEEIKGQILGQELISSKSTRKLRCSIAVFVCWTLIVTLGLGFYISHYALSKLTRLDLDIHEPWYLRRSDWQAMSPYSVDFLDLPLSFVIVGHSATNYCTEKYECIKEMLDVQKSHLHRGWQDIGPNFLVSGNGIVFEGRGANVFGAMAIAWNRRSILIMFLGDYTKDKTTPVQFEHLNIVLDQLVKQGVLRPDYTLYGQCQVASLTISPGPNVIRELHNLKHWSSENSSLCLRG*	OK	8.10718	2.54254	-1.67293	-3.19689	5e-05	0.000445332	yes	peptidoglycan-recognition protein SC2-like isoform X1	0.28461	-1.81294	992	9.94362	0.111486	282	8.14556	0.03173	XP_004929814	100000
TCONS_00020954	XLOC_019026	BMgn000485	chr1:12955127-13010454	1104	TCONS_00020954:290-3601	(+)	MDNLENSENTDKISDSAYSNSCSYSQSRRSHSSKSTHSGSYSSGSSGYGGRHVTGTNSNKLAQSPNKDKELKKKKQSQTELTTTKEQNEGESGPQESVNLETLEEEKHDVTSAPSPAHVQVEKGPENMDIASTDTEGDKVEVLSCDLQPQNSTVDVVTSRSNLICYTDGFSCVISMHDGIVMYTTSSLTATLGFPKDMWIGRSFIDFVHPRDRSTFASQITSGLAVPKTANAQSPGNSGSTMVCRIRRYRGLSTGFGVKERVVTFMPFLLKFTFKNISDEEGNVIYLVIQATPFFSAFKTSFEILPKVNPFVMRHSANGNLEYLDPESVPYLGYLPQDVQDKDALQLYHPEDLEYLQQVYEVIVKDGGMPRSKTYRMMTQNGDYIKIETEWSSFINPWS…	OK	22.313	12.6163	-0.822596	-2.17699	0.00055	0.0039299	yes	period isoform X3	0.978013	-0.032075	5109	12.3095	0.106695	4997	12.281	0.104349	XP_012548897	100000
TCONS_00021748	XLOC_019569	BMgn006736	chr10:4244079-4258981	468	TCONS_00021748:139-1542	(+)	MEGSEVGGDQQFCLRWNNFQANITSQFEALRDDEDFVDVTLACEGHRLEAHKVVLSACSPYFKELFKNNPCPHPIIFMRDCEVSHIRALLQFMYVGQVNIAQAQLSAFLRTADALQIRGLTDCSQHNDKKVNRKSPPSQLRNLLSAKPSHSTSSSKAASQNVETASNDDQDVAAHQSSRNSPDVARNNLNDDTSFQTSSHVWPKNDDYREICNHPPLRVKTDLEAPEVKNEESEILMDPGDPDKNEKSQEFAASDLLEPKMEVMEQEASDDERSNFPHMYYTENNALANPFAALQGNMDLMAGINPELRDENNEGKYLIVHKVISFSHAHVDSDSRAPGVPPFSTYKLTSAFEAARQLGGEDGGGRNVRRSANVVLLAAGGTGAPGGAGGGVQCAVCGR…	OK	2.8547	9.7597	1.7735	1.82134	0.00825	0.0385992	yes	protein abrupt-like isoform X3	1.93641	0.953386	556	9.11766	0.10437	1076	10.0705	0.202104	XP_012549420	84797
TCONS_00022278	XLOC_019810	BMgn002810	chr10:17427480-17448885	219	TCONS_00022278:123-779	(+)	MGDLSQADSSWKKMVIAKTNNEWKSSVGEDANAASNTTHFRLSDECIQYDNIKKEIEEIDEQETLNTVEPVDMIQEMDPLSLLEPKARRRRKGSGPKSETSEERAARLAKMSAYAAQRLANESPEQRATRLKRMSEYAAKRLSSETREQRAIRLARMSAYAARRLANETPAQRQARLLRMSAYAAKRQASKKSLSTVNDSLNYSIMPNQSRATNHPFT*	OK	9.90908	20.9263	1.0785	2.54707	5e-05	0.000445332	yes	Fibroin-modulator-binding protein-1	1.69917	0.764828	280	8.13353	0.189671	476	8.89621	0.322282	NP_001036969.1	100000
TCONS_00022419	XLOC_019871	BMgn006656	chr10:1494813-1504841	726	TCONS_00022419:154-2331	(+)	MLNFRCSLYRQSKYKINWSAFCAKQNFCRKMEKENNTVPSDDVLKQYFPDLPSGPLEKFRKRASFDWRRMKFIYENFNTIKLKHEFYTFMENHTLFHHSDVTPSLDEQRHIATKRMYAIYNENFLPFEKIAADPKCFQAESEALFMFDSSLAVKLSLTFRMPSNAITGSGRDYHYPLVEALSKAEIGGCFALTEVSHGSNAKGMRTTATYLPEKRQFVFHTPDFEAAKCWVGCLGKCATHAILYAMLVSKGTNYGLHSFVVPIRDPKTLKPYPGVFVGDLGEKIGLNGVDNGFVMFNKYHLPKEVALDKLGGVDDNGDYKTPIRDPKKRLGASLGILSGGRVHITGISTFYLLKAIVIAIRYSAVRRQFGPEGSDEETPVLEYQQQQIRLLPYLAATYA…	OK	7.38321	13.0446	0.821133	2.11303	0.00035	0.00262811	yes	peroxisomal acyl-coenzyme A oxidase 3	2.47924	1.3099	1036	10.0175	0.104476	2568	11.3155	0.25902	XP_012549519	100000
TCONS_00022939	XLOC_020092	BMgn002930	chr10:15305651-15332348	500	TCONS_00022939:329-1828	(+)	MRLLKMANQSQKIVYKLVLTGGPCGGKTTGQSRLSTFFENLGWKVFRVPETATVLLSGGIKFADLSPEEASKFQENLLKTMIQIENTFFELGRTSQRNCLIICDRGAMDASAFISKEKWEAILASNNWNNVELRDNRYNHIMHMVSAANGAEDFYSTEDHACRSEGVELARELDYKAAAAWIGHPYFDVIDNSTDFDKKMNRLIACVCQKIGIDTGDRLNVNSKKRKFLIKAPLAPDSEFPPFQDFDVVHNYLQSDLRKAQVRLRKRGQKGHWSYIHTLRKFHPTNGQSVEVRTQLTHRDYLNLLPQRDDAHLTIFKKRRCFIYNNQYYQLDIYRQPTHPRCRGLVLLETYSAAYDQTILLASLPKFLTIEKEVTGDPAYSMYNLSLKEDWKTSKRYYA…	OK	93.9561	32.6533	-1.52476	-5.63887	5e-05	0.000445332	yes	uncharacterized protein LOC101744916 isoform X1	0.450879	-1.14919	10654	13.3727	0.401947	4804	12.2294	0.181229	XP_004921638	100000
TCONS_00024406	XLOC_020870	BMgn012052	chr11:18180848-18190646	586	TCONS_00024406:552-2309	(+)	MRRPSDVKLLTTQERVQCLLQHGHLFKGKFPVRPPGKYVPSKKRLAAMAAKIRPPEKDRLISRSGRIKKKNKPDLQLLDNILKSELLIDDSAERQTRSQTEKNPTKPSNNNNEKISNQNSTSTSENKSDDNSSTTKQMTPDSGVVLTLELFQCDYCKKSFSSKSSIRRHIYIHLDWHPYSCPHCSKQFRHHVNRRIHIKKKHNNLSKEPDKFVCHICDKVFTLKENLSLHLASHVSNENSYKCIYCDKKFSYQLQLNQHEKQHLVTGRYQCTVCNLSYGCRNRLAMHVKSHLKIKDYVCQYCGKDFLRMNSMRRHVQICHSGHRIQCPICKKNLKGHLTEHMRTHEKRRPHECPECGQCFTQSTQLNVHRRSHSGARPYECRICDRKFSHSNALMLHIR…	OK	15.188	3.93773	-1.94749	-3.8991	5e-05	0.000445332	yes	zinc finger protein 502-like isoform X1	0.490616	-1.02733	2149	11.0672	0.784879	1054	10.0412	0.385074	XP_012551576	100000
TCONS_00024919	XLOC_021075	BMgn011965	chr11:6741798-6754211	621	TCONS_00024919:423-2285	(+)	MYDDRRGGRGGRGGSRGGRGSSRGGRGSDRSQERGPSRFSGGRGRDGGRGGRDGGRGGRDSGRGFGRMGNRDDRSNFKNDQPGGNLRKIHWDTVTLTPFQKNFYVPHPNVQRRTQSEIEAYRSQHQITVKGRDVPAPSIFFEEGGFPDYAMKEILKQGFPNPTPIQAQGWPIALSGRDMVGIAQTGSGKTLAYILPAIVHIINQPRLLRDDGPIVLVLAPTRELAQQIQQVANEFGQSIHVRNTCIFGGAPKGPQGRCLERGVEIVIATPGRLIDFLEKETTNLRRCTYLVLDEADRMLDMGFEPQIRKIIEQIRPDRQVLMWSATWPREVQNLAEEFLHDYIQINIGSLELSANHNILQIVDVCEEWEKNDKLITLLTEISSEEETKTIIFAETKRRV…	OK	19.7547	48.0213	1.28148	3.27669	5e-05	0.000445332	yes	ATP-dependent RNA helicase dbp2-like	1.74825	0.805909	4183	12.0188	0.411356	7312	12.8347	0.719152	XP_004924160	100000
TCONS_00026246	XLOC_021862	BMgn010670	chr12:11748248-11752333	324	TCONS_00026246:2105-3076	(-)	MITYVVHGLNLFSLLIQNIVNFAALIGKFILLFLIYVSSAILETKNSIKLFFEIVYEDNFSTFAEDLPNCVCNFKDATVDHFLYLGRTIVSIYYDIYSRLTSTVTTTVQTIGNVFVNLSEVLLIFSKCIIFLGDTVWLMLTFIPVHLPQLVKVMIRYTFDTAINVTVDAYMNLLNFTNFLTDVPLQSFAGLTISILIARLTIHYWESILSHLHIYYWSLVRNVIYFYYAIVHYISNSEVRIITQIANGEDIETRNMSFEIDEDPSSNQSDSLCVICQERQKCVLTLPCRHICLCTECCRRLYGYQRTCPICRTFIYHSVTVYL*	OK	12.0717	6.83547	-0.820521	-1.74562	0.0069	0.0334427	yes	E3 ubiquitin-protein ligase MGRN1	0.783047	-0.352829	893	9.80305	0.441041	699	9.45003	0.345356	JAT86942	48916
TCONS_00026339	XLOC_021913	BMgn005223	chr12:15220520-15255291	308	TCONS_00026339:932-1855	(+)	MAVMLAVGGFVIFFLHESPKFLATKGRVDEALEVMKTGYGLKDRDVDLVKSLLTITKDTGNERKVPFMKSLWQQTAPIFSRPYLMKTLQLFFLLAVCTSTNNVFYIWFPTIVNSFYNAPSNATASFCDKITSNITADVHLGETCNDVIADNTIFSGMAFSLFFTIINYIASMITSWRKSVLVGTLLISGMSTVVVDLVEQPVISLLLFILIQLVGLSAGNVASYFVDVYPTSFRGLSTSLGSMFARMTVMVGINIVDSTIVQHCRATFLSWSIFVFVGMVVACFLPKETTTTRNPLFYVSKIESVGF*	OK	13.0936	53.8758	2.04077	6.30363	5e-05	0.000445332	yes	synaptic vesicle glycoprotein 2C-like isoform X1	4.95471	2.3088	2914	11.5001	0.0868421	14440	13.8116	0.430277	XP_004926573	100000
TCONS_00026395	XLOC_021937	BMgn005879	chr12:17911974-17919239	339	TCONS_00026395:104-1120	(+)	MAQSQFSLTWESHKRNMCTGLSSLQQNNEFVDMTLAAEGHFVKVHQVIIALSSPYFKDLLASAPCQHPVVFLNKVSYTTLSLILEYIYTGEVYINVENLLELIEAAKELKIKGLEDMKLPEITSVQEPDVEDEMSTQEHDYNDENSQIEALEEGTCYLEISNLTMDEKPYIIDDDSYSVVECKEQLLQHVTDHTYEETIKQDQNADDTNENETLPNSDKNITTLFSNNAKASVIQYTVSNQGSLQMILNRYIYYLKHTNKNKSQQWRCIDYLNSKKCPAYVVSKDGVIILRISAHTHAFHDKRILKKVRSGVVFSALDEAEERGFDIKKNKSYDGNSE*	OK	43.9988	28.4931	-0.626851	-1.99147	0.00105	0.00692898	yes	uncharacterized protein LOC101742337 isoform X1	0.8783	-0.187214	1906	10.8971	0.262725	1674	10.7098	0.230752	XP_004924728	100000
TCONS_00027551	XLOC_022567	BMgn000926	chr13:7786231-7806117	340	TCONS_00027551:3-1022	(+)	CNISLVSMSGEPDTKRTKMSALDQLKQHSTVVADTGDFEAMKEYKPTDATTNPSLILSAAGMEQYQHILDKAIKYGKDNGSSIEEQVAETLDMLSVLFGCEILKIIPGRVSVEVDARLSFDKDASIAKAIKFINLFAEHGIKKERILIKLASTWEGIQAAKELEKKHGIHCNLTLLFSLYQAIACAEANVTLISPFVGRILDWYVEHTKKTYEGKEDPGVVSVTKIYNYYKKFGYKTQVMGASFRNTGEIRELAGCDLLTISPKLLQELASSDKPLKKVLDPKLAALNDIEKISLTESEFRWHLNEDHMATDKLSDGIRRFAADTRKLESLIKTLLANK*	OK	21.8536	124.779	2.51344	3.80279	5e-05	0.000445332	yes	transaldolase	1.95525	0.967351	5400	12.3954	0.782269	10558	13.3657	1.52953	NP_001040544	99398
TCONS_00027611	XLOC_022590	BMgn000950	chr13:9167567-9188203	1410	TCONS_00027611:203-4432	(+)	MGSYAKFVSDYCKNWDKSGRELFLKHLTQFTKDEHRTPLFSKSGKMSGFSQSVYDFLLCGLKGNLKKDTVLSFLREITNLHADVPSIILDIISILDAETSLDVQSDERAYFCYIVRELEPFISDKLLKERLEIDTLQDAGTLKNKNFYTKFIKIKTKLYYKQRKFNLFREESEGYSKLIVELNQEINEDTEWKNLLEIIQSLIGCFNLDPNRVLDIILESFEARPQLDALFIPLIKSYMADPHVISEVLGFKLSNMEILDNYTEPPPLMTVIALLLQHQVISFDDIYPWLRPDDVIIAKQADKEIKAVQEYIRKINIVSTKGPQTNAPTEFIEDKADPQEYWSNQKLVLCETLLRVNAWREFASLFARLPTTTMPPRPAIALCGLLHAVVEPLYRKQCR…	OK	13.853	26.0766	0.912557	1.87811	0.00265	0.0150503	yes	THO complex subunit 2 isoform X1	0.967355	-0.047883	9220	13.1668	0.449663	8919	13.1199	0.434983	XP_012547253	100000
TCONS_00027805	XLOC_022671	BMgn001030	chr13:13552088-13569666	210	TCONS_00027805:1-630	(+)	QKKRLEEAKKAKQAEIDRKRAEVRKRMEEASKAKKAKKGFMTPERKKKLRLLLRKKAAEELKKEQERKAAERRRIIEERCGKPKNIDDANEDTIKRVCKDYHERIARLEDEKFDLEYIVKRKDMEISDLNSQVNDLRGKFVKPTLKKVSKYENKFAKLQKKAAEFNFRNQLKVVKKKEFTLEEEDKEKKPDWSKGKPGDQKVKEEEVEA*	OK	154.439	64.7732	-1.25357	-3.09568	5e-05	0.000445332	yes	troponin I	0.301138	-1.7315	7058	12.6337	0.401506	2125	11.0538	0.120909	NP_001037295	93665
TCONS_00028489	XLOC_022949	BMgn001157	chr13:11393877-11446044	261	TCONS_00028489:89-871	(+)	MVFLTIVAESLLSCERRVPHQPSGSPVLSSQMLAMDVTKEARSSPLPATSQATTVTSAQNPPQPQICAGCSKVITERYLLKALDQLWHEDCLKCGCCDCRLGEVGHTLYTRANLILCKRDYLRLFGNTGYCAACNKVIPAFEMVMRARSNVYHLECFACQQCNHRFCVGDRFYLCENKILCEYDYEERLVFANMAYNPPPLAHLKRQTTHLPPPPTSGAMGGLMNGSGRSGDMNNNMSGSSPAPFAAPPHLKPLGLSATS*	OK	0.69954	5.66622	3.01791	3.3598	5e-05	0.000445332	yes	beadex/dLMO protein	3.22833	1.69079	200	7.59978	0.0216403	646	9.32056	0.0698622	NP_001040254	93617
TCONS_00029117	XLOC_023372	BMgn009254	chr14:5446362-5505309	695	TCONS_00029117:206-2290	(+)	MRIGFILYWCVFILHLCKADDAERTEKDGGRREKWGPVVRSGSFVTDPAFTASNDQILLEACQNDASCLQDHAGLEAITLLHRQLDDDANGNVDLSESDDFLREELQYDSGYEKRQRAFHHNDDMHISVKELWEAWLRSEVHNWTVEQTVEWLSESVDLPQYTTLFLQHKVTGATLPRLAVNNMQYLSNVLGIKDPIHKQKLALKAMDVVLFGPPKGSRWKDWLLASLLLGAVVGGWAALRAGRASRTQVQRMLRDMEQLRRAEMALDEMQKELEKARLEQESATTEKKNLEKKLKETSDTPVLNTTTSDLEVSKLKAEVEMLRAELRRAEGELEDRCWAPPPGLQQWLQLTHEVENRSYLRKKQQADLQLQQARDACEKLRKKRSSLVGAFVSTHGKS…	OK	24.6467	43.5006	0.819642	2.53925	5e-05	0.000445332	yes	stromal interaction molecule 1 isoform X2	1.52626	0.610001	7280	12.8258	0.123535	11111	13.4384	0.188546	XP_012551147	100000
TCONS_00029146	XLOC_023386	BMgn009268	chr14:6467467-6557160	1163	TCONS_00029146:547-4035	(+)	MIDEIKFSVKVPCIIPSVGQGHLTVSSPWHISLIKSIQTSNEAHSRTSYTAMLNTSLRGVTSRGISQWRRRVPTMECGAYTRANTRSGSVRHSNDNNNANDRTTRARGAD*	OK	16.4056	7.39025	-1.15049	-3.02032	5e-05	0.000445332	yes	Protein Kibra	0.577107	-0.79309	210	7.69545	0.730546	121	6.92908	0.421603
TCONS_00030195	XLOC_024055	BMgn007656	chr15:2602517-2607965	160	TCONS_00030195:109-588	(+)	MSRYREWDLSCKVYVGNLGTNASKYEIEKIFSKYGNIRNVWVARNPPGFAFVEFEDPRDAEDSVRGLDGTRCCGTRIRVEMSNGRTRRDRRSIFSTNHQHTNDLTTSLHNYGLLTNLTSAIAARINVLLDFCGRLTQLLRADEVTNNCVPITILLTAVT*	OK	27.4063	23.2222	-0.239008	-0.463824	0.4144	0.614421	no	RNA-binding protein 1 isoform X1	1.54543	0.628008	3698	11.8217	1.14525	5715	12.4722	1.7699	XP_012547764	100000
TCONS_00030557	XLOC_024192	BMgn007760	chr15:9619549-9628439	661	TCONS_00030557:88-2070	(+)	MSACFQKCRLCLKLGEFCSIFDQDESVKLSEMVMSFANVQIHEGDGLSDRVCTSCIENLSTAYLFKQQCERIDYLLRKSPDVNIKSPPNANYDDFFNQEFHIHTELNDLKDDNEDNGFINTSSDQPLTKHHEISDETDDSDVDSIKCVGCSQSYSTKGMHTCKTTCTIEQNDLQRSCSDETLIANDCTQNMSSTPVTPTSPRSSFVNVSCVLCTKKYDQYDDYVIHINECTMNVKLQHFVCPICHEMYTEKLLYLKHLRITHFINNSPKTSITDNGEDCVDFPIYSKAKPKSARRQIGWSVEDIYQEIDFKPAEQKSTPTSSPLKNFFSKLGNETFSRQSTPKKVSFRKLVENGKAKASIHSVLQKYIQNYKLKKKATAYSPIKGKLQVATKIQACLPE…	OK	2.63442	8.20299	1.63866	2.87354	5e-05	0.000445332	yes	uncharacterized protein LOC101742164	1.83216	0.873549	1474	10.5234	0.176213	2700	11.3981	0.322851	XP_004928471	100000
TCONS_00030861	XLOC_024332	BMgn003438	chr15:16333063-16461806	494	TCONS_00030861:1-1482	(+)	MGKKKNKNKVSGAVKTAAKTEKKLASKLKKELANLGEEDIAKVIAEIEREEAKRYAASEKVLEKPPSSRAYATLTPHPINNELVLFGGEYHNGQKTETYNDLFIYNTVSNVWRQLKAPGAPPPRSAHQAVSTPANKGELWIFGGEFTSPSETQFYHYKDLWCFSFVERKWEKVVAPNGPSPRSGHRMALLSRKLYVFGGYCDDGRDCRYFDDLYTFCLDTRTWSKVTVSGRGPSPRSACVMLPCGNDSLLVYGGFSRVRDGKTERACTHGDMFRLSTKQGGALTWRSVSVSGAPPPRAGVAGAANVVADRAYVFGGVSDVEETDEELRGEMSDDLLLLELDTARWHHVTLKTERQTRRDTEDPGSVDMEEGEQKEAMTVVTDEVFTMKLGGAAPTHNTL…	OK	33.2145	10.595	-1.64844	-2.20668	0.00245	0.0141615	yes	kelch domain-containing protein 4	0.524731	-0.93035	1705	10.7319	0.230811	895	9.80487	0.121114	XP_004923059	100000
TCONS_00031334	XLOC_024526	BMgn007842	chr15:6750812-6759233	673	TCONS_00031334:363-2381	(+)	MAQQEISCGYEYIITADLQTCLTEALQCSYSFIVSPIIHPRFRRQSTNAGKNGGFTRSDMVLSPQDWTSRIVAKLSPYINVDSPSATVRQRHEDYLNEELSYCRGLGVPAIMISIHGRESNNLARILQTYYETSHHPSLIWACVPMLCSRTYRECTEDDEEEKAWNEPWYWWSKFHERLDWDKRVGVVLELSADLPSQEVVKRWLGEPVKAIIVPTSIFHNNKKGYPVLSRAHQQLVVSMVEHEAQVIVSGARRSNIEFFVQYLHRVWRRRPNPANDPMLSYARGWEDYLQTPLQPLADNLDTHTYNVFEKDPVKYNQYQKAIAQALIDVQKDRAVKQIAEYFQSKASCNVASINQCSKNELCDNNTKELIRDDPITVMVLGAGRGPLVRATFNASDIT…	OK	44.6624	32.9098	-0.440543	-1.62026	0.00465	0.0241013	yes	protein arginine N-methyltransferase 5 isoform X3	0.61821	-0.693831	4701	12.1919	0.578401	2906	11.5022	0.357574	XP_004928553	100000
TCONS_00031932	XLOC_024765	BMgn016259	chr15:17842287-17849415	110	TCONS_00031932:40-369	(+)	MKFLLFCAMCILVYGNSEDDYSIEQEDPCRREGGLCTVAEDCPSDIRARTGLCPKQQKDGIECCYGVSVKETRCRKHGGECFSKGYCSQSLIYEEASDCPEGNDCCILV*	OK	12.9269	93.538	2.85518	4.38577	5e-05	0.000445332	yes	carboxypeptidase inhibitor precursor	2.63293	1.39667	636	9.30717	0.0894298	1674	10.6529	0.235462	NP_001106745	95575
TCONS_00032362	XLOC_025089	BMgn016290	chr16:2584347-2628126	410	TCONS_00032362:3-1232	(+)	CKVDGCVVIYFENLHGVINNSLLVHCSGGSSPLIFNNLMNTLRLLLDTFWDESVWLPPNTTWEDLEPGPDKVVIYNDYRHLFYPLPLALVLIVLRHVLEKYWFAPFGKSIGIKNTRPKKAPNNPKLENAYQASSKLKHKQICALAKQVDLSERQVERWWRLRRSQDKPSTLVKFCENCWRCSFYLYNFSYGMFILWEKTWLWDIDQCYIGYPHQGVTGDVWWYYMISSAFYWSLTISQFWDVKRKDFWQMFVHHIATIALLSFSWVCNLHRIGTLVLLTHDCADIFLEAAKATKYASYQKLCDFLFTIFTLLWIVTRNGIYPFYIIWSTSIRAPMLLPMFPAYYIFNSLLCLLLALHMVWTWLIVQVAYKSISAGQMEGDIRSSSSDISDSSHHSNHST…	OK	2.26428	6.84829	1.59669	4.09628	5e-05	0.000445332	yes	ceramide synthase 6-like isoform X2	3.26489	1.70703	1036	10.0143	0.0987478	3381	11.7208	0.3224	XP_004928963	100000
TCONS_00032825	XLOC_025295	BMgn013096	chr16:311089-317392	243	TCONS_00032825:348-1076	(+)	MSGGSSSNRNECRIYVGNLPPDIRTKDIQDLFYKFGKVTFVDLKNRKGPPFAFVEFEDPRDADDAVRARDGYDYDGYRLRVEFPRGGGGGGSRGSRGGGDRWGGRGAARGPPARRSEYRVLVTGLPPSGSWQDLKDHMREAGDVCFADTFKDGSGVVEFLRHEDMKYAVKKLDDSRFRSHEGEVTYIRVKEDYGGGGGGGGGGGGDRSRSYSPRRRGTPTYSPVRRSYSRSRSRSRSRSHNY*	OK	47.1581	165.329	1.80976	4.78536	5e-05	0.000445332	yes	Serine/arginine-rich splicing factor 1A-like	2.3424	1.22799	2670	11.3683	0.859457	6255	12.6104	2.0132	XP_012548197.1	100000
TCONS_00032958	XLOC_025357	BMgn013059	chr16:2190518-2339708	475	TCONS_00032958:159-1580	(+)	MANLTLRYLDELSYVLNRRHLASQAKASSVGDLLSAEEDRFSQWITPEECAIYTRDQRPPLVIPRITQYRQPRRDQRITQPYPEDSSDLSLQARNERQNWNSNLGRNRVELERNFSKNASESPPFIRINKNLSGSTENLLISNVRRPNFLQIPASSSGDSLDIEIRDREVSHARSRKSRSMVAPNKRINKSPVPAPRLALQQNPEALVILEGPVKRTKFFEGRKKMKKSWTDCYMILIQTALVFYKDQRTYNATKVFKPPGTPPSPAAPRAELVLPLRDARIRQCIAMHTRRHNRSLVLIVDYDQYLVQDETEEGARKWLQAIQRVIYSLYPTADYDCPTPSNQSSTDLDSLGRTPPTSRHNRNKQKVGGSSNEDLSDSTETSIQKTHVKSRLRKFFAK…	OK	0.340362	4.22961	3.63538	2.35003	0.0048	0.0247716	yes	uncharacterized protein LOC101743410	1.27482	0.350299	809	9.65666	0.0123248	1031	10.0108	0.015712	XP_004929093	88303
TCONS_00033057	XLOC_025387	BMgn013021	chr16:4013756-4037950	365	TCONS_00033057:393-1487	(+)	MSTYFQYPTPELQEELKKIAQAIVAPAKGILAADESTGTMGKRLQDIGVENTEENRRRYRQLLFSSDAVLSENISGVILFHETLYQKADDGTPLVSLLEKKGIIPGIKVDKGVVPLFGSEDECTTQGLDDLAQRCAQYKKDGCHFAKWRCVLKIGRNTPSYQAIQENANVLARYASICQSQRIVPIVEPEVLPDGEHDLDRAQKVTEVVLAAVYKALNDHHVYLEGTLLKPNMVTAGQSCKKTYTPNDVARATVTALLRTVPAAVPGVTFLSGGQSEEEASVHLNAINAVDLKRPWVLTFSYGRALQASVLRAWGGKTENILAGQQELIKRAKANGLAAVGKYVAGSIPSLAASKSNFVKSHAY*	OK	31.5678	163.348	2.37143	6.69052	5e-05	0.000445332	yes	fructose 1,6-bisphosphate aldolase	3.06532	1.61604	3792	11.8832	0.217762	11623	13.504	0.667509	NP_001091766	100000
TCONS_00034546	XLOC_026211	BMgn005650	chr17:2095273-2145361	629	TCONS_00034546:164-2047	(+)	MEVIRKNFKEALPLAAASVKKADFLVIDTEFTGIINGRDVSMFDTPEEYYKCTQKGSSEFLLIQFGLCAFHWNHKEKHYMNDAYNFYLFPRGSPGPDRMFMCQSSSLDFLASQGFDFNKLIKDGISYMTVPIECKLRENLTERQKTYSKGKDSIKVPDEHKVYVEDICNQVHQFLEEGQLDEMEIDKCNSFVRLLLFQELRARFKDKILVETKILENKNRLLNVKRVKSQDDLKNHDALKKEREWEDFEDAVGFSKVARMISESEKLVVGHNMLLDVMHTLNHFFQPLPAEYTQFKEFTHCMFPHILDTKYMSSLPPFKDKVNSSILKHLLATLSAAPFSLPKVVSDEGRGYSQLHEKHHEAGYDAYVTGLCFLAMHSHLANMRGDDTTRFLSITSPLI…	OK	74.0545	34.7652	-1.09095	-4.02804	5e-05	0.000445332	yes	poly(A)-specific ribonuclease	0.644098	-0.634647	6848	12.741	0.136778	4411	12.1072	0.0880984	NP_001153677	98885
TCONS_00034651	XLOC_026259	-	chr17:3612507-3620225					OK	0.141015	0.699417	2.31031	1.98702	0.0104	0.0464734	yes
TCONS_00036002	XLOC_027024	BMgn008339	chr18:7730092-7992425	1936	TCONS_00036002:433-6240	(+)	MRSQASKPSPKKGELSKIHSKSITPKVIKKKKVPAKKVKKIVSKALVKQPKKSSAKDDSSSKSDDDAGAASSPDSAADNAKPGTSKLRTDSPVKKTKSGPKEKKDTLKTLTETNTKRAPTKKSNTVNKKRINPKAKMNKDTKQTDTKYKTNRETPKKVTKKVCKTKTIVKKADLKKKSSQQTKQANTEKDKSANDSTKDRKSGCETIESAANCCQSNIDDEELDNQDNKDEATVNAKTETKSDNNKSASPSTASKISTISLTETTKVEIERPPKFFTSTRLPRTVDIDVKCLKNSKGNLSVSERFLSMKLETKTEENSKDKNVSNTLISQGPEIDVYTFTEKVDSPKNILSDFRSPINKNIGRVRPIARVKGTIIDKKTESEKKKYSPHRPIEEVVKQL…	OK	19.262	23.1607	0.265924	0.462255	0.35645	0.559783	no	uncharacterized protein LOC101746298	1.13718	0.185455	2389	11.2138	0.866401	2716	11.4051	0.98525	XP_012547531	100000
TCONS_00036088	XLOC_027063	BMgn016516	chr18:10349652-10393511	2166	TCONS_00036088:84-6581	(+)	MLLAFNRVFFVLILYLISCVSYCEQYGEFENTLYVSEDVSKSDRRMTVINRFTENESSGSYRRKREATTVQPVQGNVSTQITHLNDSHQQLMVHWVGEGSNVIICLARDSIPRNKGVISPSALFISYDYGKTFMNKTESFKLGDTSNNGYAQLDKFFNHPKYPEFCVFVDSTNKKLYYTSDNGRNIHRSDLTFSPSELAFDEEFPDKYVILDKVDINRKLYLTLDGGKTFKMIQSFVKTFVWSSGPGFSKVFYVERWKPDGTSAVLSASDPTDLINAEVLFEETKDFQVKGDYMFATKQSKEKNTLHLYISHQRGPFYKAEFETELNLRKFHIADVTDSRIFVSVMHTDTLANLYVSEIGRNFTQYNFVLSMEQILCYFPEGNWKDSWLEDVTEDPFTD…	OK	20.9033	36.5887	0.807672	2.72613	5e-05	0.000445332	yes	low-density lipoprotein receptor-related protein 2-like	1.41014	0.495837	651	9.34172	0.429987	918	9.83402	0.606341	XP_013172850	66605
TCONS_00036110	XLOC_027074	BMgn016522	chr18:11078196-11101195	608	TCONS_00036110:115-1938	(+)	MIAMGHSDNATIAQWKEGLKETWQDLLELIETRTQMLAASRELHKYFHDCKDTLQRVNERARGVSDELGRDAISVSALQRKHHNFMQDLTTLQQQVESIKSECSRLGASYAGEKAAEITRREREVADAWAALQAACRARRAKLEDADRLYRFLSQVRTLTLWMDDVVRQMNTGEKPRDVSGVELLMNNHQSLKAEIDTREDNFSACISLGKELLARQHYASADIKEKLLQLTNQRNALLRRWEERWENLQLILEVYQFARDAAVAEAWLIAQEPYLMSQELGHTIDEVESLIKKHEAFEKSAAAQEDRFSALQRLTTFEVKEMKRRQEAAEAAEREKREREAAEAAAAAAAAQDALDRADTPHEQPAANEASSVPNPAALAAPADPAAPAPPSPQQSTS…	OK	59.4098	20.5375	-1.53244	-3.46227	5e-05	0.000445332	yes	spectrin beta chain	0.194664	-2.36094	1224	10.2569	4.19292	238	7.89477	0.81621	XP_012547498	96651
TCONS_00036492	XLOC_027374	BMgn012610	chr19:751636-758847	481	TCONS_00036492:193-1635	(+)	MSNWIGYAVSVNCGEPLGCYQGTILEADGNTLTLTKAFRNGFPYPKLQVTLNAADIKDLKIIEAKPEPSEQTHSTVAVTKSGKKAQKATVCENLQANPAQTSSGTPSTSVVNNKSANRNTVQGPTRSKPIEIQANRNNKNNNHAGSYGNCSSTPKGRNLVGQEKARRRNEACFGESTDAIDDDFDFEGNLALFDKRAFWEQMRNSHKPDLVRQADDAGKYKHDENVLGTAPVARHAMRVPDNLRGPIDYVTDEGVIVPSVVPRVRRQLWEGMVSYGLAECAYTLLARCAADVALRLVGGGRRLEPRNAHQPPCVLAVPGPHRAGAAALRAARLLAAHGARPAYVLPAAAAPALQPDVDALALCGVAPADGLDAAPSPDLVLLALYDPLLDDPQDKYESV…	OK	14.7031	6.90384	-1.09064	-3.18655	5e-05	0.000445332	yes	enhancer of mRNA-decapping protein 3, partial	0.641709	-0.640008	2738	11.4174	0.493422	1757	10.7789	0.316634	XP_004926225	100000
TCONS_00036597	XLOC_027424	BMgn001860	chr19:3554165-3572282	130	TCONS_00036597:454-843	(+)	MIFVLALLAMANAQGNGYEPIDNRPYIVNPPKDYNPNGNGYEPIGILYIKSAGIIFSEKEIDISTCPDLRMELPSTAKPLDHDVPDLKHPTDHGHKPQEQTHKSQEAPKIPDSKDNKDLPNVGQMGGKN*	OK	3.33459	30.2094	3.17941	2.55684	0.0021	0.0125003	yes	uncharacterized protein LOC101746878 isoform X3	1.36666	0.450657	2754	11.4233	0.174614	3763	11.8083	0.238639	XP_012551989	44118
TCONS_00037206	XLOC_027709	BMgn016568	chr19:3075957-3112837	356	TCONS_00037206:46-1113	(+)	MSSPTEPHVPNSDVHVIDIDIEVENIIENPHVSIQIDKVRGSNKSENNNMMNGNGNLTTSKQKTMSAAEAVQKARDTFNRGTTRPIEWRRQQLKNLLRMYEENQNVMVEALHKDLRRSKMEAILLEVDYLINDLRNTLHYLDEWTKPEHPPKGFVNILDEVVIYNDPYGVVLVIGAWNYPLQLLLLPMAGAIAAGNTVIVKPSELSVACSNFVVENLPKYLDNDAFIVFEGGPQETTELLKQRFDYIFYTGGTNVGRIVYEAATKNLTPVTLELGGKSPVYVDNTVDIVVTAKRILWGKFINVGQTCIAPDYVLCTKEVQNKFLEASKKVLKEWYGEDPQKSPDLCRIINNRHFS*	OK	27.2755	62.8373	1.20402	2.69598	5e-05	0.000445332	yes	aldehyde dehydrogenase isoform 1	1.78257	0.833959	7852	12.934	0.213269	13997	13.7723	0.380166	NP_001166835	100000
TCONS_00037292	XLOC_027743	BMgn001934	chr19:4688892-4807463	1083	TCONS_00037292:379-3627	(+)	MGCARYIACALLLLCPLALSRHDDDFAFDNSEEFQVELTANHSEIAKNGLRRLWGVPDTLAYVGHLFRMEIPKEAFSGKVVAYKVRSDHGRRTPNWLAVDSRHGLISGIPQYQDIGTHTFTVTAHGTTKGLTATDSFTIEVKKGEDKPHSKYGTCIGDENRLVLLILVDGAFHKIVPRQRIRALMQLANFMALDGDEFWMEPYKTETHPDTILSGIGSSLRKRGDATTAIYLNVGCGNKLWDRHKVLVAGLREQSRDGTLEQLLRLPVIGWRLLAVKPTFRVKRQDEDHDVKITPYSESASETNNITFVPVSSRHLEDVAIVPDYIPTTTEPEMQTVMIRASNELPPLSSESPPTVTSQSPEPPTQPITTSSTTTSTTTQAPATTPVTVPVTTPVTTPV…	OK	11.7882	33.6366	1.51268	3.5359	5e-05	0.000445332	yes	dystroglycan isoform X3	1.77651	0.829046	7827	12.9277	0.143339	13905	13.7618	0.254644	XP_004933416	100000
TCONS_00037468	XLOC_027832	BMgn003997	chr19:10167578-10195520	601	TCONS_00037468:88-1890	(+)	MVKTRSSARVGNAATNASAENGTSSELRTRLKTTENGHNNRSQKSYSSRTSQALSSGNVGPGGSQGKDPLAPVVPNSRNMYQHPAVSGYNPQDTRSQTMPVSARQNPLYAGAMYHGYGGAAGPAALAPMPSPSPTTPLPPFPVHPDVKFKKLPFYDVLAELMKPSTMMPVQAGRMQESTYIFHLTPQQATEIATGKDIVGTSNKLDYIIQAQLRFCLLETSCEQEDHFPPSVNVKVNNKMCPLPNPIPTNKPTPEPKRPPRPVNISSLVKLSPTVSNTIQVTWAADFTRAYVLSVFMVKKLTSAELLQRLKNKGTKNPDYTRSLIKEKLSEDYDSEIATTSLRVSLMCPLGKMRMSCPCRPANCPHLQCFDASLFLQMNERKPTWLCPVCDRAAPYDSL…	OK	7.26962	18.1831	1.32265	2.44485	5e-05	0.000445332	yes	E3 SUMO-protein ligase PIAS3 isoform X4	1.78556	0.836377	2008	10.971	0.205624	3586	11.8082	0.367155	XP_004922440	100000
TCONS_00037584	XLOC_027893	BMgn004145	chr19:14268980-14319922	512	TCONS_00037584:35-1570	(+)	MKLRKSEMAAIGSGRGTMDSQNQVQSDTVDRLKLLYPNVNEEETPLPRAWSTKDKFSYIGLSQNNLRVHYKGHGKTHRDAASVRATHPIPAACGLYYFEVRIVSKGRDGYMGIGLSAHGVNMNRLPGWDKHSYGYHGDDGHSFCSSGTGQPYGPTFTTGDVIGCGVNLVDNTCFYTKNGHHLGIAFRGLPPNLYPTVGLQTPGEVVDTNFGQQPFVFDIEDMLKELRARTRVAIDEFPLPDEQGQWQQVLHRMVSTYLVHHGYCSTAQAFSRATGQPIDEDIASIKNRQRVSKLVLAGRVGEAVETTRRLWPGLLERDPDLLFLLKCRQFVEMVNGTDCEASEDGANGVATSVISHTGRPHKRSNGVAADAAEEGGGRDVDMAPAANGDHVEADASSQR…	OK	23.6379	41.6938	0.81873	2.49841	5e-05	0.000445332	yes	ran-binding protein 9 isoform X3	0.960311	-0.0584265	8105	12.9846	0.159459	7783	12.9262	0.15313	XP_012544190	98649
TCONS_00039238	XLOC_028873	BMgn004379	chr20:4662376-4717708	1188	TCONS_00039238:245-3808	(+)	MAEIVYPQGCRPITDDLGPDELVRRLKVLAHTLQGLGQDEGMYQQYIPLALHLADEFFLTHSSKDVQLLIACCIADVLRVYAPEAPYKDQEQVKTIFLFLINQLQGLRDPKNPAFKRYFYLLENLAYVKSFNMCFELEDCQEIFCALFSLMFKIVNIEHSTKVKAFMLDVLCPLITESDVVSNELLNVILINLVEPNKREHKHAFALAKELIVKTSETLEPYIQAFFNHVLILGKEEKSLLIFSKVYELIYELYQCCPSVLLSVLPQLECKLKSAHFQERLSGVALLARMFSEPGSQLAKQYPALWRAFLGRFNDISVPIRIKCVQYCMHFLVHHPDLRKDITETLKLRQHDANEQVRYEVVMAIIATAQRDFQAVAESEDLLHFVKERTLDKKFKIRK…	OK	15.3341	28.0727	0.872423	2.70358	5e-05	0.000445332	yes	sister chromatid cohesion protein PDS5 homolog B-B isoform X2	1.37577	0.460239	6229	12.6041	0.121996	8570	13.0647	0.167839	XP_004922579	100000
TCONS_00039243	XLOC_028874	BMgn004378	chr20:4718125-4739045	346	TCONS_00039243:1-1038	(+)	MATSVLQPEDCRREHEPKPDIIESPRLTDDERVHILEAKERETGELPPELREKARIELREDPILREEALNQMRHFIEKHPAIKKCRQDAPFLLRFLRTKKYSIPQACSMLERYLTIRQMYPQWFQKLDPLDPKIAAVIDAGYLVPLPKRDAEGRRVVLSCMGRFDPHLYDSCVMARVHSMIVEHLLDEPRSQLLGYTHVNDEAGMQMPHISLWSLTDVRIMLNCIQNSTPMRHKRTHFVNIPHYGVRFFEFAVSLLSDKLKDRVMFHRTSSDLTRYVDPAILPKEYGGTVPLKDMIEELKRNLLKQREELLALDDMCIDLYALEKNDLTQDIHSTAGSFRKLELD*	OK	12.0666	2.94761	-2.0334	-3.11678	5e-05	0.000445332	yes	clavesin-2 isoform X1	0.423581	-1.23929	611	9.24238	0.0877521	259	7.99648	0.0371701	XP_004922581	100000
TCONS_00039545	XLOC_028998	BMgn009137	chr20:12698625-12740996	761	TCONS_00039545:348-2630	(+)	MSQSGKHANDTLHENKRERRRGAAGRAAALRRAPSDSDCSGETASLSADSGDRIVKPQVAPPRSGKSRSRRRGSEWEVLEGLKDGQRFEKRPDVFNGYLHKKRKWPLKGWHKRFFVVDGGILVYARSPADVARGRLHGSVDVGLSVISAKARRRRIDIDADEFIYHLRAKTPDVFRTWLSVLKAHRLYRQHLLTFGARESAPKINAPLDDPAATDTSSRLVSPTTATIRGPQFVSGTPGGRLASWIIESGGPLENASRELGQAQLSVQQLQRLLDALEMQQQVHHDTDVSLDGASPNVKKDRRKFGLRKKKSNSKCASIELTASHIDPSNSHMALSALTAPPSPGGGASSIPNSAASLPIACAAARPQSLPGAEAFGPTAGPASISSLTPDHQLREDFT…	OK	9.87609	4.83532	-1.03033	-2.77973	5e-05	0.000445332	yes	oxysterol-binding protein-related protein 6	0.29333	-1.7694	1519	10.5603	0.076245	446	8.79992	0.022365	XP_012545717	99600
TCONS_00040084	XLOC_029378	BMgn001554	chr21:11238621-11240780	145	TCONS_00040084:88-522	(+)	MSNCVVVPWVNTEEWLKVMNLIYSENSDENEALKWLLLWKARCPSLPSGIESTLILLQVHIQDLNSPDDNGNDHVLRLAYSSAIMRFINHMLDVSITKENTLSKAAKNVGIPDWIVELRHDTAHNNNLPSLSLLRDATQFGLDW*	OK	27.3134	3.65187	-2.9029	-2.80169	0.00015	0.0012229	yes	Uncharacterized protein	0.441721	-1.17879	2108	11.0392	1.44361	931	9.86375	0.637671	KOB69268	62590
TCONS_00040482	XLOC_029564	BMgn001453	chr21:8400826-8528686	184	TCONS_00040482:400-951	(+)	MWLAALVCLLCQSAGISAGEGGDGEDLSVTTTVDYSNVTGTTESVGQPYFDNSTKRDYTAAVGQPAYLHCRVKNLADRAVSWIRKRDLHILTVGVHTYSSDARFAALHTDGSDEWTLRVAPAQPRDSGSYECQVSTEPKISLSFRLTVVVSKAEILSGPELFVRAGSDINLTCIARHAPDPPR*	OK	1.59712	0.159729	-3.32178	-5.07936	5e-05	0.000445332	yes	hemicentin-2-like	0.527057	-0.923969	449	8.81077	0.00351036	236	7.88474	0.00184646	XP_012548861	100000
TCONS_00042104	XLOC_030465	BMgn009976	chr22:14008455-14061806	139	TCONS_00042104:3-419	(+)	TRSLSVRYTSIPTSVTMSLNPNFFPNGYQDPKHPEEEVVSNWPYRTTPLVLPGAKVRREPGPTESYLRHHPNPAMRAPPNHDYRDTLMKQKVLHKQFNSPINLYSEQNIANSIRQQTSPLPTNGHYGRPHVVKRQVFY*	OK	2.60646	8.61457	1.72469	2.12574	0.0004	0.00295249	yes	PDZ and LIM domain protein 3 isoform X6	0.200045	-2.3216	1471	10.3039	0.0528174	294	8.19538	0.0105659	XP_004926434	93023
TCONS_00042697	XLOC_030897	BMgn016900	chr23:2799472-2804574	143	TCONS_00042697:1664-2092	(-)	MKVTHNIRRKGMWIFFLGQEEIAGLSPSTGGGGRNMSDSNRLKTSYRSTTHLRASHETELMKRQRGESEVFSAEHNSPIILPLGTPDRRSLAPRPPVLPVGRLSEAHLDGAGLYGLSHRILPRVSTSVGSPSIVCVFYGSAG*	OK	7.63877	3.87027	-0.980907	-2.53573	5e-05	0.000445332	yes	malate dehydrogenase 1, mitochondrial-like	0.969489	-0.0447029	1071	10.0645	0.609372	1038	10.0178	0.59078	XP_004927815	63158
TCONS_00042962	XLOC_031048	BMgn011562	chr23:11579249-11586054	463	TCONS_00042962:396-1784	(+)	MGDNFQNKTMAAVMMDYDFKIKTQNERSKVEDLFDYEGCKVGRGTYGHVYKARRKDGSDTKDYALKQIEGTGLSMSACREIALLRELKHPNVINLIRVFLSHTDRKVWLLFDYAEHDLWHIIKFHRAAKANKKSVMVPKGMVKSLLYQILDGIHYLHSNWVLHRDLKPANILVMGEGPERGRVKIADMGFARLFNAPLKPLADLDPVVVTFWYRAPELLLGARHYTKAIDIWAIGCIFAELLTSEPIFHCRQEDIKTSNPYHHDQLDRIFNVMGFPLEKDWEDIRKMPEHATLVKDFKRSNYQNCSLSKYMDRHKIKPDSKAFSLLQRLLLMDPNKRITSEQAMQDPYFAEDPLPTQDVFAGCTIPYPKREFLTDDDQEDKSDSKARQNQQQQQPNTQQ…	OK	6.97617	12.8911	0.88587	2.08143	0.00065	0.00455746	yes	cyclin dependent kinase 8	1.18519	0.245123	1427	10.4781	0.269054	1692	10.7251	0.318882	NP_001162054	100000
TCONS_00043196	XLOC_031161	BMgn011360	chr23:17556913-17582355	693	TCONS_00043196:247-2325	(+)	MSKDRSSRRFYRAESTHDLSSFMDRGRAASDENRWTFECAWEVANKVGGIYTVIRSKAFVSTEEMGDNYCLLGPYKEQCARTEVEEGEFPSDSPLLTAVNAMRSKGYKLHTGTWLVDGNPQIVLFDIGSGAWQLDAYKQELWDTCSVGIPHLDVEANDAVILGFMVAQFISEFREAVEGRGGVPARVVAQFHEWQAGIGLIVLRVRHVDVATVFTTHATLLGRYLCAGNTDFYNNLDKFSVDEEAGKRQIYHRYCMERAASHMAHIFTTVSDITGYEAEYLLKRKPDIITPNGLNVKKFSALHEFQNLHALAKDKIHEFVRGHFYGHFNFDLDKTLYFFIAGRYEFGNKGADIFIEALARLNHYLKSSGSEVTVVAFLIFPAKTNNFNVESLRGHALTK…	OK	6.89121	3.0215	-1.18949	-3.36352	5e-05	0.000445332	yes	glycogen [starch] synthase	0.653019	-0.614804	1115	10.1197	0.0462717	728	9.50328	0.0302163	XP_004930739	100000
TCONS_00044164	XLOC_031575	BMgn011129	chr23:21906712-21957047	626	TCONS_00044164:266-2143	(+)	MNFELEESLLTQSGPVSERMEKWTEAQRKGQKIDIDVYGKPSEKQLRELEHVRSLSKELQDNLHELETAVRIADVENQAMNPTAPMLDYSEDHEFVSANRLNNCYGDEDLVDAKEEEKRRLTKGKKTTTEIQQFYADQSVFVTGGTGFLGKVLIEKLLRSCSDVDTVYVLVRNKRGKDPRDRVHDILDDFLFQRAHNEKPKSVHKVVPIYGDMTLPGLGISDEDRKTLVSKVTIIINAAATVKFDEKLSIATAINVKGTKEVLKLAKECRNLKAVTHVSTAFSNTQVKHIEEKFYDSPMSVETLEAVSELDDELINSILPTLLGKRPNTYCFTKAVAEEAVRRYGEGLPICILRPSIVVSTYEEPVRGWTDSVYGPTGLVVGIGTGVLRTMYMDLEKVA…	OK	0.900465	4.48983	2.31792	4.64512	5e-05	0.000445332	yes	fatty acyl-CoA reductase 1-like	3.71864	1.89478	98	6.54572	0.00985107	366	8.51299	0.0366326	XP_004925977	100000
TCONS_00044213	XLOC_031597	BMgn011105	chr23:22873526-22961175	427	TCONS_00044213:337-1617	(+)	MAAIAALFGLLVIAFVSGQNVEITPIKAVRRIGDELIVLCKVPYQIDSCRMIVGTTSYRLIPGNQEGDVVYSGQGLTTGECGAHIKNIREDWNGNVTCVLPPQSSNIEVTGTMRLLVARAPGDPHLISPPQPQFKDEDIFSAQCVVPNGRPAAKILWFLDDEQLLEGVHQPVVTDEPGSDLQTVSQNITRTIRADDNNRMLACRAEHEALDQPREAKRQLIVHYPPKRLESGPITVFGLKLGAEGKLNVTVRSNPPPTAVWMVGDIRITAPHSTDNGAITALEPLHLGNGHYNVSLHLARITKEDVERTYYLQVFNDLGREEFTLRMSTMDEPAGVELDTGAIVGIVVAVLVLLIAVFLGVFAFATDRWCFAGRSHRIDMPDGADSEAPLPSHDDIKGS…	OK	7.36037	19.4954	1.40528	3.89586	5e-05	0.000445332	yes	fasciclin-3 isoform X6	2.16268	1.11282	2008	10.9713	0.0253724	4343	12.082	0.0548725	XP_004926006	100000
TCONS_00044816	XLOC_032107	BMgn000144	chr24:7803715-7850243	592	TCONS_00044816:126-1901	(+)	MAHSGGVLSSDISRRNPQDEYELVQRIGSGTYGDVYKAKRLNGNGELAAIKVIKLEPGDDFAIIQQEILMMKDCRHPNIVAYYGSYLRRDKLWISMEYCGGGSLQDIYHVTGPLTELQIAYMCRETLMGLTYLHGMGKMHRDIKGANILLTECGDVKLADFGVSAQITATINKRKSFIGTRYWMAPEVAAVERKGGYNQLCDIWACGITAIELAELQPPMFELHPMRVLFLMSKSGFKPPQLRDKERWSQLFHGFLKLALTKNPKKRPTAQKLLQHPFFLQEMSKRLAIELLQKYSNPPTHCNPEPDEDAGISSVPQRIASRHTNRGGRRILAERLRSPGNSVDRLRPRSLVPEPAPPSDEEGAITFTAPPAARADTINNTVYHRQSSEDWSVASIISC…	OK	3.91486	8.93372	1.1903	2.29384	0.00155	0.00966025	yes	mitogen-activated protein kinase kinase kinase kinase 5 isoform X2	1.20796	0.272575	1047	10.0328	0.0391453	1264	10.3038	0.047286	XP_012552949	100000
TCONS_00045065	XLOC_032222	BMgn017078	chr24:15047022-15054941	133	TCONS_00045065:3163-3561	(-)	MAPESRARAVLSLPGLQQLSPCGPLRQMCWGAHVADCPRPRDGPFPCADCGKDHAAVDKRCPVYRGKARMMGVSVPPPVPPVPRTGTVTAPPSVFIRKGKGKSSLTPAPPSYITILFAMVVGAMASATTLMA*	OK	0.621763	0.281843	-1.14147	-2.17792	0.0001	0.000847087	yes	uncharacterized protein LOC105842998 isoform X1	0.391304	-1.35364	14	3.91326	0.036379	5	2.40961	0.0126904	XP_012553220	55856
TCONS_00046585	XLOC_032990	BMgn004939	chr25:7006500-7017447	928	TCONS_00046585:247-3030	(+)	MEDETSSDNQKGSENPMDTDEGPLINENSNGLSHLLTEGEFNSVDAAVDESSTSNQCFLNAVELSAGSAGDYLENNGPRFSTDSFDIGDNAVTFPNDSLNSALTEDNSIQSDSASHKAVLDTDSRQSESQHATDSNVGEINENSGNDSNFATEHVNLNVDKSEQLEIVEPCSSPVKDPVIKQDEGKEFKNQREVDDIKEQSQDSASKIGGAEETEVVSEDELPEVQKPSIKDAENVSDDELPGPKPAELPADTEVVSEDELPASKKESRKRKPDEERSNYDPGSPTSEGESSTKKQAITKNGESKPIPAEKRPSVDEKPKKKVLPELEKYWKVVNDDPTDFTGWTYLLQYVDQESDVEAAREAYDAFLSHYPYCYGYWRKFADYEKRKGSKKKCLEVLE…	OK	18.4846	30.7534	0.734427	2.29716	0.00015	0.0012229	yes	pre-mRNA-processing factor 39	1.20526	0.269343	3524	11.7793	0.332767	4247	12.0504	0.40107	XP_004924511	100000
TCONS_00046683	XLOC_033027	BMgn017164	chr25:9038490-9042307	215	TCONS_00046683:303-947	(+)	MKMMTRCIPEKNKGFFKRLDKCLLLSHENSEGLKINFMIEKGGIPNYMQFDISFNLEKSYSYKSSKLFLLWSVILLNCLIVTYVGITLELVITFFTICMCLAIIWFRMLKSETVLIIPNVGIRSTQNYPTRNLHTFVSWDRIEDIIINEVIVTSKVLYYLTILVKEDPENTENIEQNQSTRLVPLFLRTRPSLAVLEKIYADVQDLLTEAKQQV*	OK	3.49685	7.32997	1.06775	1.84578	0.0043	0.0226041	yes	phosphatidylinositol N-acetylglucosaminyltransferase subunit H isoform X2	0.773463	-0.370596	721	9.49437	0.143483	558	9.12227	0.110978	XP_012545288	100000
TCONS_00046733	XLOC_033052	BMgn005049	chr25:10015475-10054172	1857	TCONS_00046733:117-5687	(+)	MFTKKSHQDLKKSTVKIQDSKKDSATRLKHLKIILEHFDSDEAKTYFENNFSHVYFILYDNFIQAENNLRQKELPFHLVHKAGKEELEAALLLLEKVLCLLPELLGKRWQLHSLTRIFSKLLHSANSQKLRAEAIKFFLLWYQALGDNAPFEVHKMFALLIPGMPDPGNVTRPSPLNPKPFDITTNPHETGDFSMEDIMQHPNFSTVIDNAKKVVVEQTSSGIMGKIANVSASIFHDTNALNPVQSVEIQPLLPPSANEKSVDNETKYFFEILLDGMATSVTKLQWRDRSHAKAMRCFAFLLEKFKQYYLPVICPQFNHKNSLYKPNLDLPVQHNILEDDFVLCRVTLIKWVANYAHFMKKQGSDGGQPSSMTSIGSHLPHSNTPTPATSLHHEEETSF…	OK	9.4937	6.58071	-0.528727	-1.50575	0.0088	0.0406895	yes	probable Rho GTPase-activating protein CG5521	0.855772	-0.224702	1320	10.3643	0.0603028	1129	10.1412	0.0516054	XP_012544569	99946
TCONS_00046795	XLOC_033072	BMgn005070	chr25:10839655-10855802	710	TCONS_00046795:144-2273	(+)	MTHKLQGNVHESNLFQSKTTIWWITFSLLCGATFLTRYYKVLEPDHVCWDETHFGKMASWYINRTFFFDVHPPLGKMLIALSGKLSGYDGTFPFEKPGDKYDGARYQGMRLFCTTLGALVIPLTFLSIWEMTKSLEATFIGTLLLLCDVGFMTLNRYILLDPILLFFMSCSIYGCFKVSTLTNDGLLPFSPRMLSWQIFLGTSLACTMSVKFVGLFVVLFVGLRTVADLWNILGDLSKPVKFTITHLIVRTLTLIVWPFVLYVFFFWIHLTVLSKSGNGDGFYSSGFQARLEGNSLHNASAPRVLAYGALVTLKNHRTGGGYLHSHHHLYPAGVGARQQQITTYTHKDENNRWQIKPYNRERVEGTVVVRSGDLVRVTHAPTGRNLHSHRERAPLTAKH…	OK	4.8633	10.6189	1.12663	3.11648	5e-05	0.000445332	yes	protein O-mannosyl-transferase 2	1.71277	0.776328	251	7.96161	0.0339059	429	8.74791	0.058073	XP_004921812	100000
TCONS_00047534	XLOC_033370	BMgn005105	chr25:12380159-12456457	1120	TCONS_00047534:235-3594	(+)	MWAKAMGGRGAALWRVAALLAVAAAVTTAYTVDCNHEYADCDTELSKIANDEEEVPSTTSSQTLETLPPISTPTPRIIEVTENVTEAELTKEAEVTTEVQEAIEPKPQPRLLNLNVDELQNFANALHNQTIEKSSKKGLDLSDVNLDEEDDEVPRIHDHKNKNIPDKFYSNLQAPFHHLLNNERGSDEIGTCKENEISYKIGDHMDRGCEESCECTPGGVFECSPRCKHPYIRSGRRLNDPLCFESPVDSCCSIIACSTGNGDTKPMKLDVCRYGNDTYPVGTKWNIGCEQSCMCEPNSVATCKPRCKQYSPSEKCINVQDPNDACCEIQVCDVSQDVHEEPPDNVTSSTTSASETARSFDMSEELKSTSRPLVLAEPIGSVKVLNNNSVQVNLIHVNT…	OK	2.21128	41.5578	4.23216	11.6574	5e-05	0.000445332	yes	putative epidermal cell surface receptor	24.0279	4.58664	239	7.728	0.0131167	5743	12.4779	0.315167	XP_012545022	100000
TCONS_00048237	XLOC_033819	BMgn010758	chr26:895199-906678	1212	TCONS_00048237:194-3829	(+)	MTHLQYMPGDPRLVDQLVYELKSKGIFDQFRKDCIADVDTRPAYQNLRQRVESSVSSFLSRQCWKPDLNKNQLREKLRKHILDGNYLEQGVERIVDQVVNPKVASVFIPQVEDLVYNYLGIVRKKPVPDLNEENNTNLLPTDLEAVSPGSVHSDDGKDATDTQEVMDIEDGNTLGTDNETEKNIQYPNTIEMCVFESDTSIDKSCIPLPDEILPENIPQPENSPPKLDLDKIELPKEPESIQASKFHTDMSDEVDRTDKEYFKPVASDDDDSSSDASLIRNMSPLTPIRNLNNENSCDAQQAFENDSDGKVEDNKEPCTFRFALDHKPDEDSKDNTEKSDRDQTNLAFQFNNQVNIKPFNTPVSDDSSNSNNLQIDYESDANSKTNVENKIPETENSED…	OK	4.15687	9.08741	1.12837	2.50541	0.0001	0.000847087	yes	biorientation of chromosomes in cell division protein 1-like 1 isoform X1	1.6197	0.695729	873	9.77064	0.144441	1414	10.4641	0.233951	XP_012551699	100000
TCONS_00048417	XLOC_033925	BMgn002246	chr26:8903338-8921926	2200	TCONS_00048417:1-6600	(+)	MEDSEDNIMTTEDVKNVDNPTTVRVKPKKRSIVERELETNLTARITSPLTNRDRTSTSRYGRARRLKIETEVSDLKKVIPDVLKSNQNEKSPVKAQSPVYKMHASNSPMKMESPKRQIEAFVAQGQNSQQENISVNCFDSDDISPENRLPKIFVRKDIMKSKDTKLGKNVFSPKKSQKINSHLNNLLERTSANFNMNKSKDYIENLSGVKTLDFDSKKKKKENKESKSNINTVKENKTAPKNEVFDLEAQCLYQVGDLAWARMGTYPFWPSIITRDPLSGLFVKKKLFGRVERNIIHVTFFGDNGRRSWIVENMLRRFMGLAEFQMTKEQFTSEDKKKDPKLYSSFSISEKKQPLWMTSVEEAEMLLREPKRLRIDLLNEMLVRSRTSKHLPKGHKSGK…	OK	20.767	65.3389	1.65365	4.23234	5e-05	0.000445332	yes	uncharacterized protein LOC101747197	3.08364	1.62463	7405	12.8538	0.470197	22833	14.4768	1.44992	XP_012546962	99807
TCONS_00048493	XLOC_033969	BMgn000005	chr26:11953601-11977108	406	TCONS_00048493:98-1315	(+)	MFIAVYLFIIIVCIVYFEKCLRRNAKFPELSRRLPFIGHAHLFVGDSVHLWKIAQRISRESLQNGGLVTISFGPKKVYAVTDPEDINTVANLSMEKSYIYGFSRPWLGDGLFTADVLTWRNNRRLLNQAFKHTILDGFVDVFNNQARSLVDELAAEADLEKIYILNKLSLHSLRLVFKTILGVSDQEVTPEKFNSYLETNNILHNIFTKRFQKFWLHSDIVFNRTKLKIEQDYAVAVLHGVNAMVLKNRKEIRRLNLENGTQDYSGEQKPFIDLLIEIAEEKGLSDMEVIHELATFIAAGHDTVPYTLLYTLMCVGSHPPVQQRIYEELQQVLGSDDVTKQNLSSLVYLEATIKETMRLYPIAPVVSRVTDCDVKLRNSTIPSGASVALSPPPPCVGLR…	OK	8.2626	3.83405	-1.10773	-2.08039	0.0005	0.00360706	yes	cytochrome P450 4g15-like	0.583968	-0.776039	744	9.54109	0.0534953	435	8.74559	0.0312395	XP_012545784	99681
TCONS_00049020	XLOC_034277	BMgn004531	chr27:13975222-14122857	1150	TCONS_00049020:588-4037	(+)	MATVEGRPAQYGVSLRQLRELMETRGAEGMAKINALGGPQELCKKLYTSPTDGLSGSKADLQHRREVFGSNLIPPKPPKTFLTLVWEALQDVTLIILEVAAVVSLGLSFYKPADDPNDAAHLDEEEGHYQWIEGLAILISVIVVVIVTAFNDYTKERQFRGLQSRIEGEHKFAVIRGTEVKQVPISEIVVGDICQIKYGDLLPADGILLQSNDLKIDESSLTGESDHVKKGETFDPMVLSGTHVMEGSGKMLVTAVGVNSQAGIIFTLLGAAVDKQEKEIKQKKKEERKQQRKGTQRKSIPGEEEGVGGVGANHAPPDDNHAPPAADKPPPEPQHKKEKSVLQAKLTKLAIQIGYAGSTIAVLTVIILVIQFCVRTFAIEGKPWKATYINNLVKHLIIG…	OK	48.1279	16.3422	-1.55827	-5.49908	5e-05	0.000445332	yes	plasma membrane calcium-transporting ATPase 3 isoform X4	0.360705	-1.47111	12012	13.548	0.0813606	4333	12.0785	0.0293472	XP_004926068	100000
TCONS_00049066	XLOC_034300	BMgn013343	chr27:514663-538731	1281	TCONS_00049066:169-4011	(+)	MMNPQYPPPGQNNNAPNNPIYPPSSQEYNGVQNANIYSQMPAGPQKQFDQDMAQKMQNMNINGSQGFNIPPTQLPPGQAPPNFGPGQGQRPAPMPIRPPAGGQFPPMTGQRPPSATGQALTAQEGFETQRPPSQPMPPMSQPQGISGQMPPHSKGGFPYQPIPVRPGMPPNQPTAGMVAQPGAAPQPGPGMQGPPQSQSSSIPTGIPQSRAGPIPGQPGLNPQSLGPQSGPGQGAPPHPGQMPRQGLSQPGQSSLGPQHGLPPTSQGLPLQPGMSPQPPQLGPGLQQQTGQRQPPHIGQQGTPTSQPSFPQQPGQIPSHPGQAGFLSQPGPPGLPAQPVQAGQPQPGPPGLPTQGLPSQPSHPGLPPQPSQGLLPQPGLPPQPGFPQQPGFGPQGPYQQ…	OK	12.8984	28.3532	1.13632	2.78636	5e-05	0.000445332	yes	protein transport protein Sec24C isoform X1	1.43906	0.525128	5043	12.2989	0.234323	7258	12.8251	0.337205	XP_012546208	98438
TCONS_00049280	XLOC_034382	-	chr27:11165282-11228578	103	TCONS_00049280:898-1206	(-)	MASRAPTVTDVVRMPTVCRSPLPPTNNRTVERPVQDARTNCNWSAHMTSLTVVVLYSTRNSFQRCVVLEVFFLIFFFIFQITFSRFFPSLNSKFVPHLNVLH*	OK	1.18064	0.226348	-2.38296	-2.52474	0.0004	0.00295249	yes										CRL06916.1	48148
TCONS_00049305	XLOC_034391	BMgn004615	chr27:12489790-12547252	508	TCONS_00049305:312-1835	(+)	MGETVEIKEGKYTPLLRQCFVTASVAINIVGHGCVIGFPAILIPSLRKSDSHIHLTRSEESWIASVVGFALIVGNFIITLILDNIGRKKSHILTIFPNLAGWFLFLLVNNFPGLMAARFLQGIAMGMLGPLGSIIIGEMTDPKSRGVFLTSVSLSLTLGVLSSHALGTCFTWQISALLCSLVTFISLCLIIFTPESPSWLLSKGRYDEAREGFFWLRGKNAKTEHELERMITSQKMTRKASITGQKDTVKANLKNYFRYLSEAGKKPEFVKPVVIMVFLYIMFQFAGINVISSYATDILAELLDSEANSNFLMVALDIERLICNLIAIYLMKTLKRRTLLFSTTIICILAYISKGSYVYAKQAGILTYDSQWIPITLIGIYMFSLTVGVSSIPFALSGE…	OK	38.4015	13.0958	-1.55206	-4.46615	5e-05	0.000445332	yes	facilitated trehalose transporter Tret1-like	0.440908	-1.18145	3026	11.5039	0.110261	1334	10.3809	0.0486149	XP_004926978	100000
TCONS_00050795	XLOC_035320	BMgn009045	chr3:14207742-14259911	261	TCONS_00050795:160-942	(+)	MSDEIAENGTANGDVPEIELIIKASTIDGRRKGACLFCQEYFMDLYLLAELKTISLKVTTVDMQKPPPDFRTNFEATHPPILIDNGLAILENEKIERHIMKSVPGGHNLFVQDKEVASLIENLYSKLKLVLVRKDEQKSAALRAHLGRIDGLLERRETRFLTGDTMCCFDCELMPRLQHIRVAGKYFVDFEIPTTFRALWRYMYHMYQLDAFTQSCPADQDIINHYKLQQALKMKKHEELETPTFTTSIPIDVNELNNAE*	OK	32.5632	17.1227	-0.927329	-1.81286	0.0059	0.0293364	yes	chloride intracellular channel isoform 1	0.188018	-2.41106	19718	14.2565	0.388081	3707	11.855	0.0729661	NP_001040533	100000
TCONS_00051381	XLOC_035557	BMgn008958	chr3:12235951-12283733	963	TCONS_00051381:141-3029	(+)	MRWLIGASENMRHGKSGGGRARWESRLLVAAIALAFVNAQDISICCDKADKAEGTCRSVCEKMSQLNMTTDRSVIEQSTPNIYKFCGHHLTEFWICMNQTIQEVVSGTGWWGQVCCQLSRSSECRAACASALDAKALTESCRRSDEIAMFDCMDKQQEAQWCCSQTQSVSCHEACQKVLRRLGHSRIDGDAKEAAVDACEQSPELLHCLRDLTSSTVVGDTSKYLPCCHESDSQSCRSTCESVLRRTSDIEEIVEALGQDCGAPAIHNVLWQCFLRKDAPTDTKDLIPRDVANLHCCLKAKSATCKELCFHTFNKGSQEKWDMFDLQCLDNSQETMLSQCLEDVRTPCSLGCSSLTYCSQLNDRHTTMFRSCNVRADLDAHLSMAEQEGRRTLQVAGMH…	OK	5.67693	2.42597	-1.22655	-2.93998	5e-05	0.000445332	yes	reversion-inducing cysteine-rich protein with Kazal motifs	0.569052	-0.813369	1002	9.94006	0.0209738	570	9.15727	0.0119352	XP_004931718	100000
TCONS_00051411	XLOC_035571	BMgn008949	chr3:12502288-12529118	550	TCONS_00051411:133-1782	(+)	MPNGIRLWWVAVALLLWTPQTECREVTIEDIRDVLMTLVHLVRATEDKLERHEFREKMLGEQVKKMLMALDKKHRMLEPLKGMISRLDQRLSNVETILLQKEEREKDSQKKTDEALESIQKSILALTTTVTENAKENKNTEVDSKLESYGNTLERRLNATDARLEAVKTQIDNLKNTITEDNLRTLCQGMAYDENPLKKHLTEAEKLLNKYELKLVEYNSTSNKNDVEPINEIPLADEQWHSKMAEVMERQEIDIKNIQKILIDAESMWKDLPRVSQIERAHNETLEAIVNATEDIKANDEKSVDKVNKELRAMSDRLQGTNVDIQKSLTQSNTLTERAFNDIWRSYDMLRNEMKTLTKSEEVILQTADNVIAAKQGIEYGVQKILIYVGDLIKTQTKT…	OK	3.76686	0.493877	-2.93114	-5.14414	5e-05	0.000445332	yes	centromere-associated protein E	0.260819	-1.93888	285	8.10202	0.0106224	74	6.2049	0.00277053	XP_004931700	100000
TCONS_00051435	XLOC_035582	BMgn008938	chr3:13234699-13257501	364	TCONS_00051435:2564-3655	(-)	MCRSLLIASFVLFLDEIMCYINLADVECGVDVARTARIVGGVDSLPAEFPWTASIWRQGTHQCGATVINDRWLLTAGHCVCSVFDEFYRTKQLSVVVGYTDISSRDDSEPLSKIIPHPDYQCNKKSNDVALLKTARRLQWSSELRPACLPKFLSEDFSGSLATVAGWGFTDENRNEGDRSNILQKTEVTVVTNDQCNQWYQSQGSKVKIIPTQMCAGYENGGRDSCWADSGGPLMVRDDKKHTMVVGVVSTGSGCARPKLPGVYTRVSRYTDWIVQSISNENSRSGLSWYPRFG*	OK	1.26537	7.67273	2.60018	3.31478	5e-05	0.000445332	yes	trypsin-1-like	1.83663	0.877058	439	8.66621	0.113527	806	9.60286	0.208506	XP_004931819	100000
TCONS_00051913	XLOC_035923	BMgn014951	chr4:2324342-2327334	428	TCONS_00051913:344-1627	(-)	MKPEIDAKVEENDNPLPVGDVIGDTAYSERFVLKILIKLANLDTLKNEIKEKSFEEDLCMLWDMTAERDVVLFLQKHDSLNLINFALPMMDSPRLIEIMIGIVGNMCCQKEVVSSILKMDGFLIQLLEHSKCDDSLTLVQLLRLINSCLFLSNDSDIPILMTVFESVGYSPTLYFILKNSSHKDLLVTALENMNAICSSCNTERHSSKFLMQFLRSEALDSLSAAITEITTNLKDSFRTDEIERSLIISLQISLHLLGFDSSAEIYENSKDDVIVMMRQILDYYEEKLVIQKEIEPDLIDIIESISTIINILNLNNICDLTKYFDHSYKMWKAVNMIMKSDKDGATNFEQDDKVELLDFTSKIKAPLCTLMCNYMATCSDENLLKCLDVIGQDYDDIIT…	OK	2.55118	5.16553	1.01775	1.73774	0.00795	0.0374943	yes	protein saal1	0.949495	-0.0747678	32	5.03728	0.0181406	30	4.93107	0.0171958	XP_004929180	100000
TCONS_00052100	XLOC_036022	BMgn006208	chr4:7986254-7999246	515	TCONS_00052100:136-1680	(+)	MAEDFDVEAMLEAPYNKSDNTSSSKHRSDKHSDKHKERDKDGSRRRSRSRDKRRSRDKDSRRSRDRDDKKDRERGRDRDRRDRDKDRIKDKDRERERERDKEKRRSRDKDRSRERDRSRDKNVHKKEKTPEREPQKEYRSKSRGLDPKLEDLPPEERDLRTVFCMQLSQRIRAKDLEEFFSSVGKVRDVRLITCNKTRRFKGIAYIEFKDAESVPLALGLTGQKLLGVPIIVQHTQAEKNRVGNTLPNLAPKTSNGPTRLYVGSLHFNITEDMLRGIFEPFGKIDHIQLMTDPETGKSKGYGFLTFHHASDAKKAMEQLNGFELAGRPMKVGNVTERADGGSSTRFDADELDRAGIDLGATGRLQLMFKLAEGTGLQIPPAAASVLMGSGSALVSPQPQ…	OK	46.1077	79.7057	0.789673	1.78947	0.0043	0.0226041	yes	RNA-binding protein 39	1.09553	0.131628	6755	12.7118	0.892736	7401	12.8519	0.978019	XP_004929274	100000
TCONS_00053977	XLOC_036979	BMgn002639	chr5:8188693-8203922	680	TCONS_00053977:281-2320	(+)	MSGDVQPRKRKDKRKKKDEINVDEPRGTAAALGEGDVFLHSQHDHGTGGHWCAKIIFFSLLAVLVTLIGLIILENRGLTELEANSVESRYSGVLDGWIEDAPDDHHDEQTLDLKHHEDDHLEDNVQEDSEVEVERIEREVSDEELQQELSSNEVNAPVQKSEEKIDGGKPEDEVEDSVEDDEDEFLEPEDIEESPVVEHITAPAGKPLPELEDDISTEKPINSLTEEDEYEKQQEQLRLEKEQASHKDGGDSLDDDWPGEPSESYWRQQLDQAEQDLRQGEWSAALGRVSAPSLQTSARARYVKARALDATAEARRDNRLLSQAIAAYIDLLKMNERLSDKKLIEVTDRTLERIKFRGTYLSAEPVYKLLIRRFPDNPNYRNNLTVSLLMANRADLAET…	OK	15.5564	56.5742	1.86264	4.74192	5e-05	0.000445332	yes	aspartyl/asparaginyl beta-hydroxylase isoform X6	1.35461	0.437881	4903	12.226	0.321952	6642	12.6927	0.43612	XP_012551145	97574
TCONS_00053988	XLOC_036984	BMgn002643	chr5:8260146-8303710	939	TCONS_00053988:297-3113	(+)	MYSMNYIGQFIANFREFYNEINAATLTGAIDVIVVEQPDGSFTCSPFHVRFGKLGVLRSRFKVVDLELNGEPLNIHMKLGESGEAFFVEEVGEDEAECSAHLATSPIPAARFEELYEPRRRNSLSAVEPDHGQASDYTKRRYTADGQTMQKPDLTKIKKNTTKDEKPSKDNEALFEMEDLDEGTDWTDGKTPKTFAATQLGEAESEANQAVQKISVHNDFRPIDVAPTEEEVKQNGNGKKKKKTRKVSSKKKHQRKSSTSSVSSQSDRAGSEQRALQSTAIVNATDMSFFSDTELNAATLSRGSRGGTPVQSDTEVELSRTTTGDKSSQSWRWGELPEPPVRGVESGECASAPSPASASPASPSSPASPASPAEPLSSDEERPSRRGVLSGMFRFMSTR…	OK	17.6042	4.61948	-1.93011	-4.30923	5e-05	0.000445332	yes	phosphatidate phosphatase LPIN2 isoform X2	0.391271	-1.35376	6423	12.6367	0.220362	2513	11.2905	0.0862211	XP_004932325	99243
TCONS_00054136	XLOC_037029	BMgn003480	chr5:11600525-11613278	892	TCONS_00054136:178-2853	(+)	MADSDDEYDRKRRDKFRGERGPADNSSYRSSDRREERSRGREEWTERSRGGRSGPDYRDYRSGVTGTRGYSPIRGEGPPNKRIRPEWPIEDRRYGGMPHDSYGSYGWAHDHFGPHPAHQGYGQPMPPVPARDAVMPVGSAEGPPTMMTFKAFLAAQDDSITVDDAILKYNEYKLEFRRQQLNEFFVAHKDEEWFKIKYHPEESIKRKEEQLSALKNRLNVFLELLETGELDKVSVDVDKTEKLIRLLDIVVIKLEGGSEEDIKELDEPVNVENSNVNDKADKIVSDKLIVIEDDTVKVKEEKEDDKQEKKTESPKSTAPLTMKIDPHLRHLQEQAKLFSRYNSTDETEEKPAEKPAEKEPPPPGSSSSSSSSSSSSSSSEDEGESTSRRKSKSKSKSKT…	OK	15.401	24.4195	0.665006	1.73949	0.00235	0.0136971	yes	serrate RNA effector molecule homolog isoform X2	1.54684	0.629324	3893	11.9214	0.318445	6021	12.5561	0.492583	XP_012549286	100000
TCONS_00054530	XLOC_037192	BMgn005775	chr5:20599962-20640554	438	TCONS_00054530:916-2229	(+)	MVHELRSSKEVGEIKPEMNAAVSTESMDMTEEDMSQVEGCGLSGGSEDEDECASSPAGSNYDDGNDIIKNAMSDEVTKQLAAAGPVGMAAAAAIASSKKRKRPHSFETNPSVRKRHQNRLLRKLRQTIEEFATRVGQQAVVLVATPGKPNTSYRVFGAKPLEDVVRNLRCMIMEELENALAQQAPPPPADDPSLFELPPLIIDGIPTPVEKMTQAQLRAFIPLMLKYSMVRGKPGWGRESTRPPWWPKDLPWANVRMDARSEDEKQKMSWTHALRQIVINCYKYHGREDLLPAFTEEDEKGPPTQPMSQYAPAVLQTITNPDGSVSLIQVDPNNPIITLPDGTTAHVIQSGEGGASVVGALDTDGAVAVDLNAVAEATLNHEGQIILTADDGHGYPVSV…	OK	14.8186	6.31448	-1.23067	-2.12848	0.0022	0.0129871	yes	DNA-binding protein Ewg isoform X5	0.828575	-0.271296	2860	11.4791	0.439781	2370	11.2027	0.364391	XP_012543897	100000
TCONS_00054933	XLOC_037352	BMgn003752	chr5:9622981-9634498	172	TCONS_00054933:119-634	(+)	MWDPTHVQVTVQKARGLLIKGKNGTNNCFVTIALGKEKFQTSVKHKATQNVEWLEECELPIPTQGNTAEVVLKVYDEDFVKDHLLGQVSIPLKDLDVYERPRNRWYKLQGKSGKENDKDRGEIEVKIAFTVKEGSLTDLSKKDKHRSSLSSLAQNVGGSLMSIGSIEKRKS*	OK	9.40704	16.8477	0.840735	2.15043	0.0002	0.00158944	yes	rab11 family-interacting protein 1	1.35304	0.436202	1821	10.8312	0.467488	2464	11.2671	0.632529	XP_012549325	100000
TCONS_00055083	XLOC_037413	BMgn003709	chr5:12010600-12054414	699	TCONS_00055083:76-2172	(+)	MDAVQEHKNNTENSTVTVENGATDTLKTNNMQVANGVSQQIYLNGPDQVVPAESYTTAIPGCHVKLRIAPRGLAAEPPISVPGLLSRTTARYPNATALATKKADGKWHKITYKQYQDRVRIIAKAFLKLGLDRYHSVSILGFNSEQWFIADLAAIHAGGYAAGIYTTNSADACFHCLESSRANICAVQDKKQLDKILSVKHKLPLLKAIVQWEGPVDTSIPGIYSWDQLLEIGAKEPDTQLNEILKSIAVNECCTLVYTSGTVGPPKAVMLSHDNLTWDAFGIGERCQNLQPTRDRLVSFLPLSHVAAQVVDIYTTLSNAVTVYFAQPDALKGSLVETLKEVRPTRFLGVPRVWEKMYEKIMAVGASSGPLKKQIALWAKEKGLQYHLSRINGYEGSSV…	OK	5.81421	13.5996	1.22591	3.73536	5e-05	0.000445332	yes	very long-chain-fatty-acid--CoA ligase bubblegum isoform X1	1.97678	0.983154	1608	10.6424	0.0446357	3179	11.6328	0.088235	XP_004930169	100000
TCONS_00055427	XLOC_037526	BMgn003609	chr5:17098742-17100607	176	TCONS_00055427:311-838	(+)	MNSGRTLPNVLVTGTPGVGKSTLCRNLADRTKFAWRDVSNIAQEHNCLDEYDPEYQCPFLNEDKLLDIMEGMMAKGGNIVDYHSCDFFPERWFDGVFVIRCNNTTLYDRLAARGYTGKKLEDNIQCEIFATILDEAQSSYKPVIIHELQNDTEEQIQKNVDTIVAWIERWKEENI*	OK	111.593	21.477	-2.37737	-7.88088	5e-05	0.000445332	yes	adenylate kinase isoenzyme 6 homolog	0.230686	-2.116	2761	11.4285	1.5114	637	9.31621	0.348659	XP_004930023	100000
TCONS_00056191	XLOC_038022	BMgn006517	chr6:8900300-8981359	1570	TCONS_00056191:152-4858	(+)	MFRCIPLFKCNRQVESVDKRHCSLPTVPEDILRYSRSLEELLLDANHIRDLPKNFFRLHRLRRLGLSDNEIHKLPADIQNFENLVELDVSRNDIPDIPEDIKKLRALQIADFSSNPIPRLPAGFSQLRALTVLGLNDMSLTSLPNDFGSLVSLQSLELRENLLKSLPESLKNLTNLQRLDLGDNEIEELPGFIGELPALEELWLDHNKLQYLPPEIGNLKALICLDVSENKLEKIPEEIGGLSSLTDLHLSQNMLESIPDGIGHLYKLTILKLDQNRLHTLNENVGRCTNLQELILTENFLTELPDSIGNLNKLTVLNVDRNSLAEIPMDIGNMTLLGVLSLRDNKLTKLPNELGNCTSLHVLDVSGNRLQYLPYTLVNLELKAVWLSENQAQPLLTFQ…	OK	6.31309	10.5396	0.739406	0.920219	0.1124	0.279837	no	protein lap4 isoform X8	0.362406	-1.46432	11156	13.4432	0.282545	4043	11.9761	0.102396	XP_021207461.1	32.168
TCONS_00056240	XLOC_038037	BMgn006531	chr6:10047609-10124042	345	TCONS_00056240:283-1317	(+)	MCDNTNPSTQSIADYLAQLLKDRKQLAAFPNVFMHMERLLDEEIAKVRASLFQINGVKKEPLILPEPEGMVTTLTEKVYVPVKEHPDFNFVGRILGPRGMTAKQLEQETGCKIMVRGKGSMRDKKKEDANRGKPNWEHLADDLHVLLTVEDTENRAKIKLARAVDEVKRLLVPQADGEDELKKRQLMELAIINGTYRDSSSKVSVPVNGQCLITDEEWRRVAAAAAETQRLLAPGGVGGVALRTPAPLGAPLILSPRMSAPAQPGLLNGAGAGAAAGLLSPGEPAHQLIYASPYDYANYAALTAAANPLLATEYAAADHAGVVRRAGRVAMREHPYQRTALPAP*	OK	52.0461	19.2536	-1.43466	-3.41315	5e-05	0.000445332	yes	protein held out wings isoform X1	0.389637	-1.3598	1486	10.5282	0.604311	579	9.17831	0.235462	XP_004930624	100000
TCONS_00056318	XLOC_038074	BMgn006298	chr6:13822535-13838015	381	TCONS_00056318:1-1143	(+)	MAEDEVLFDDVYELCEIIGKGPFSLVRRCVHRQTAQQFAVKIVDVARFTASPGLSTADLKREATICHMLKHPHIVELLETYSSEGMLYMVFEYMDGSDLCFEVVRRASAGFVYSEAVACHYMRQILEALRYCHENDIVHRDVRPHCVLLAGRDNCAPVKLGGFGVAAQLPTPTSHRAPPGRIGTPHYMAPEVVSSQLYGKPVDVWAAGILLHVLLVGYLPFAGTRERLFEAICRGRLRFDAPLWDDVSDAAKDLVQRMLTVDHTQRINIQDVLNHRWIKDREKQNRIHLAGTVEELKKFNSRRRLRAATLGAAAADDEEEEEQQPTRKQAMLEEANAAAVNIVVESLDDVAVLQDGPLFIDPDLFHSVLDDLQLRALLEA*	OK	4.93515	11.3551	1.20217	2.18779	0.00035	0.00262811	yes	peripheral plasma membrane protein CASK	2.14511	1.10105	423	8.71902	0.0282116	907	9.82378	0.0605171	XP_012553279	94279
TCONS_00056360	XLOC_038092	BMgn006315	chr6:14788830-15014449	465	TCONS_00056360:1-1395	(+)	MSPGERAALGRREPARPQYANTAPGFPPPYYPPYGVPHPSAWLGAPLISMAGRAPAQSRNTPVSKLAMQAQGAPLIIQNRKKFNIGFDQRNQRTQQGHTENVQRDRCELTDGNRARNQQQQTRSARGGRNNNTDAVSIASDESSGSANSETMLPRIIKPRKRRKKDRKPNNIVPHDLTTTLDLGEVDHCAVSSIGTHGIYDETYCRDMSLPYRLDVKVLEYPEPAPTPYRVTALGEALEATRFGITEAVSPAESAVSSCQCRLCDPVGQIWDADSIADLLDENSSGDFTPTKLEDSMKVVGPLGRRGADTTLRRSWSDPSSRVPERRDIGNSDNYSAPNLYSLFPPARQASSPEPRSPLALEISSEIVTSMNGHRDLEIKLFSTSPPAMNSDRRSFFAD…	OK	100.502	76.305	-0.397381	-0.688955	0.2245	0.426137	no	uncharacterized protein LOC101740768	0.793475	-0.333743	6498	12.6519	4.65806	5156	12.3267	3.69606	XP_004923549.1	100000
TCONS_00056897	XLOC_038352	BMgn006275	chr6:15014550-15022574	173	TCONS_00056897:97-615	(+)	MNTSVAKLAQISFRSINFTVQGTPVLASELHTSAPLCRVVSGKYRITKKRDKPLTYEMANPPHYIAHRKSWNSWNTSSLKDGLRRSETAVEDEFIRRFMTGTWHGLVCSEVIIKRQFNHIRVAAIMRRAVSPTKMYFLLGYTEELLANWLQCPVTLELQTVDSFKDVVFKYI*	OK	8.27939	20.7597	1.32619	4.50457	5e-05	0.000445332	yes	GK12989	0.604567	-0.726027	1007	9.97027	0.59996	609	9.24933	0.362716	XP_004923550.1	100000
TCONS_00057966	XLOC_039108	BMgn010018	chr7:2068446-2106212	932	TCONS_00057966:171-2966	(+)	MPGKIKVKVLAGRNLPVMDRASDTTDAFVEIKFGGVTHKTDVCRKSLNPHWNNTEWYRFEVDESELQDEPLQLRLMDHDTYSANDAIGKVVISLAPLLAREANNPKSTTAPHGGAVLSGWIPVFDTMHGIRGELNVIVKVELFSDFNKYKTSSCGVQFFHCPMIPPGYRANSIHGFVEELVVNDDPEYQWIDKIRTPRASNEARQVAFIKLSNQVQRLVGLKAAELGANAVVGYQQDFDLEGEAGVVARAVGTAVSITPIPTPSYPNNIPPCTQQSERDRDRCDKDKGSPRHARHESYGGRDPPNPPAPAPAMQNPSLNATSTPMGIHRRSSDSDLSVTPKGGSLNTSAGNVGSGGGAILRPSMNSNNLDMLEYPFLTMTEFPPGFIVHIGGTVCARSV…	OK	4.63033	6.9335	0.582469	1.55525	0.0067	0.032653	yes	C2 domain-containing protein 5	1.15818	0.21186	2088	11.0275	0.0569245	2419	11.2393	0.0659289	XP_004923298	100000
TCONS_00058677	XLOC_039562	-	chr8:790746-822524	184	TCONS_00058677:431-982	(+)	MELVLSVNGALRGLIRELTGNDIAKQCQAAGCICNLALGDSRAGVAVTKSAGPYLIAALDNLTTELAVTCAWTIGNLAGSGPRACDLLVSQGAVSKLAGLLSHSTQDVRDAGLEALVHFVYTVEDLKSDHLDRIVVAVQKLDLSEQTSQILFYLSSRRLHSFTVGRRIYFKNHKYCSGKIDTV*	OK	4.03862	2.36548	-0.771731	-1.54504	0.0097	0.0439486	yes	importin subunit alpha-2 isoform X1									XP_004925377	100000
TCONS_00058971	XLOC_039697	BMgn005452	chr8:9438053-9531236	421	TCONS_00058971:120-1382	(+)	MSGDALEAQLQVRFITKQEQYAVPDSPYAIQCNVHPADLNTLINAILKETSPSFEKAVIFDFLVCGELLCASLAEHLQEKGVSTEDTLEVEYLERFPAPTPQDCLMHDDWVSAVQAHSSWILSGSYDNSLHIWSTKGQHKLAIPGHTSPVKAVSWVSFQGDQATFVSGSHDQTAILWVWNVPRNSVDCMITYRGHDKGIECLSVSADGNRFASGSWDNNVCLWSASLAEEENHPATKKSKPEHGTTRNPLTTLKGHKEAISGVQWMDYNTVLSSGWDHLLKIWDCDLGGIKQEIAGNKAFFDVDWSPLNNSIITASADRHVRLYDPRSTESIVKTTFTSHTGWVQSVRWSKTKDTLFLSAGYDNQVKLWETRSPRTPLYDLSGHEDKVLCCDWSNPSLL…	OK	113.961	37.3592	-1.60901	-3.39883	5e-05	0.000445332	yes	ribosome biogenesis protein WDR12 homolog	0.394221	-1.34292	5872	12.5177	1.02609	2315	11.1763	0.404508	XP_004932125	100000
TCONS_00059019	XLOC_039720	BMgn005470	chr8:10722207-10729040	1185	TCONS_00059019:163-3717	(+)	MAQSTTNYDDLEDGEIESGDEESTETQNVDIINENSSKLEEKSKESLETQDQYYSKSGKKKRSKSNKDHKSKDKSKKNRRYSSPVEDDFASNIEKAIRKAMNKNEAEDDQSRLDEDRRRYKKRKKHDTKEGSSKKRKKQEYSDEMDESEMMCVRGASPVQKQSPVEAHEEDDRDSYASDSSHESRGHQHRQQRQKHQQTDRFKNDRGKNEKRRAAHSMQDTDGPCLYYMQGKCHKGDDCIYSHDVHPPRKMELCKFYLMDCCAKRDKCLYMHADFPCKYYHTGLPCIYKDDCKFAHGKPLTESLKNILLKHIESAPKEILGDFPRLNREGALKMLQATQAKLKQEYPDFMESQEKTIPSLFELSIPNPQCSDFSVNQSNNEKQNKISPKVRQSRWQNDN…	OK	18.8552	29.513	0.646389	2.40945	5e-05	0.000445332	yes	protein suppressor of sable isoform X2	1.30288	0.381707	1295	10.3231	0.711722	1688	10.7191	0.927289	XP_012550976	100000
TCONS_00059160	XLOC_039777	BMgn015440	chr8:12983045-13007406	1208	TCONS_00059160:179-3802	(+)	MTGLQWLRLDKTNLCDIPEELGKLMKLENLSLKKNNLEKLFGELTELKCLRSLNVRHNKVKTSGIPAELFHLEELTTLDLSHNRLKEVPEGLEKAKSLLVLNLSHNRIETIPPTLFVQLTDLLFLDLSHNLLETLPPQTRRLANLQTLILNDNPLGVFQLRQLPSLQSLETLHMRNTQRTLANLPTSLETLSNLSDVDLSKNALTKIPDALYTLLSLKRLNLSDNEISELSAAMDTWQKLESLNLSRNNLTSLPASLCKLQNLRRLHVDDNKLDFEGIPSGIGKLGALEVFSAANNLLEMIPEGLCRCGALKKLNLSCNKLITLPDAVHLLSDLESLQLHGNPDLVMPPKPVERPRGAGLQYYNIDFSLQAQLQLAGAASAESTTTSSVKSDPIARKLR…	OK	22.1964	14.317	-0.632591	-2.17526	0.0004	0.00295249	yes	protein flightless-1	0.817858	-0.290078	4118	12.0065	0.179936	3368	11.7171	0.147163	XP_004932247	100000
TCONS_00059250	XLOC_039817	BMgn009885	chr8:17049084-17059748	503	TCONS_00059250:1-1509	(+)	SEIRNQHTPNSNTCFQYSRLFCIPQNNDNLEKMTADKESYGDETNQDSEVEQTPTENVNEDTEDDKITFKDLGVVDVLCEACEELKWKKPSKIQKEAIPVALLGKDIIGLAETGSGKTGAFALPILQALLENPQRYFALILTPTRELAFQISEQFEALGASIGVKCAVIVGGMDMVAQALMLSKKPHIIIATPGRLVDHLENTKGFNLRPLKYLVMDEADRILNMDFEVEVDKILRVIPRERHTYLFSATMTKKVQKLQRASLQDPVKVEVSTKYQTVDKLMQSYIFIPVKFKDVYLVHILNEMAGNSFIVFVSTCAGALRCALLLRNLGLAAVPLHGQMSQNKRLAALNKFKSKSRSVLICTDVASRGLDIPHVDVVINLDIPLHSKDYIHRVGRTAR…	OK	103.827	30.5362	-1.76558	-4.58897	5e-05	0.000445332	yes	probable ATP-dependent RNA helicase DDX47	0.472233	-1.08243	5258	12.3578	0.655775	2483	11.2782	0.309678	XP_004923655	100000
TCONS_00059329	XLOC_039846	BMgn009917	chr8:18462296-18496631	751	TCONS_00059329:1-2253	(+)	MIKSAYSEMAHEGPARTEGSPHHTPSPPHLPHLPVTDSGFHHQIMQNHSPRKNHIVERAKQTLENSFLQQLKKQQQLQQEILLQHFQQQRQQLAREHENQMREHLKLWEQQKKAMEEAALREAREAREAREARERHERDRVELMRKKDIHEHSANASTQVKQKLQEFIKKKQANANGTVTTASYRNWGIVKSSSGESITSTGATATHPYRLTAPLPLNLNAPPPQPSPADYPLRKTASEPNMLKQRLKARVIERRASPLARRPLRTRHKHRSESHLHLPPTDGAVRRARGDWDPARAHLVLTRAHDAAVQLREEEGEVIDLTSKRNDPPAPVEPAPLTRALSSPLVGARVPATGLAYDPLMLKHGCACGQHAPTHPEHGGRLQSVWARLCETGLAARTE…	OK	10.9527	8.37376	-0.387338	-0.92793	0.1049	0.267684	no	histone deacetylase 5	0.373359	-1.42136	3759	11.8565	0.210688	1403	10.4537	0.0786622	XP_012553395	78120
TCONS_00059602	XLOC_039985	BMgn005370	chr8:8343786-8386976	529	TCONS_00059602:138-1724	(+)	MGDDPIHDSENTQTQTQNSQVDWSQQNTPATIPNIWGRLYSTKVSINGKYCWKQEYQPEYIDLIQPEFSLGRSFNCTFIMRKDNIKESIIRNVSKLHFVIKRNLSELLSPAIITDLSHNGTFVNGEDIGKGNSRVLDDNDVISVTHRIVKIFIFKDLLKNEQDQVPKEISQKYYISRVLGQGACGLVKLVYDKIKCTKHAMKIIKKSRLTNGQINHINKPAKIMNEINIMKALRHPCIISIEEVFDSRDAVYIILELMEGGELFDRITKFSHLTEPLTRFIFRQMVLAVKYLHSQGITHRDLKPENVLLEGDEDETLVKITDFGLSKFVGEDSFMKTMCGTPLYLAPEVLRANGQNTYGPEVDVWSLGVIFFVCLVGYLPFSHDYKEMSLKNQILNGQY…	OK	6.33306	2.30565	-1.45773	-1.67395	0.00835	0.0390001	yes	cell cycle checkpoint kinase 2	0.596389	-0.745673	517	9.00538	0.0803044	308	8.27049	0.0478927	NP_001036936	99367
TCONS_00059738	XLOC_040045	BMgn005310	chr8:11877349-12084106	859	TCONS_00059738:959-3535	(+)	MSPAASTKYGAQEAHSPSKTIPKTLNIMEHLNNIATREKNYNEQTACVTKACIHSSMRQNHSNKKLDENNELTDLDRYTMQIRDYECSRGEIERRPSRNSDEKVRRGERVMQNLLVKESIIRQKIDVKADATSPVASKFKYVQNTQEWMKTIERLMCIRIRALFVIGLLLTMIATGTAAPTRSRATRTAHHERSARGYLETFGYLSKSRPEVGNLIMDGNEQSYEDDFRIAIKTLQEFGGIPVTGELDAATRNLMKQKRCGRPDREEQDHENRRSKRFAVQGAKWKHTNLTWSLSSTRRPSLLDPYETRSVLARALDVWEQASRLTFTEVNSEEADILVSFAKRYHDDAYPFDGRGTILAHAFFPGVDRGGDAHFDDDELWLLEPKDDDEEGTSLFAVA…	OK	0.215418	28.8257	7.06407	9.87153	5e-05	0.000445332	yes	matrix metalloproteinase-14-like	39.2956	5.29629	68	6.07435	0.00604491	2659	11.3751	0.237538	XP_004932298	100000
TCONS_00059864	XLOC_040102	BMgn009854	chr8:17061370-17082624	644	TCONS_00059864:453-2384	(+)	MAATRKLQGEIERCLKKVTEGVETFEDIWQKVHNATNSNQKEKYEADLKKEIKKLQRLRDQIKSWIASGEIKDKSTLLEFRKLIETQMERFKVVERETKTKAYSKEGLGAAQKLDPAQKEREEMSSWLISSIDALNLQVDQFESEVESLLVGKKKRLDKEKQDRMEELKLKLEKHRFHIKKLETLLRMLDNMSVEVEQIKGIKEDVEYYIDSSLEPGFEENDYIYDDIQGLDEIELSGVGPSTDSNNSNGSAATPNSILSGTSPVRTPTSENHNHSTDSIDIEKKKKEEIIPKPVKPLPLRAVNASVVGNSTCNVSSLLNNSAAASNSTGVSGASTPSKPAPSPPPRPANSTEVVENGPVSITAAVNTTTTHLPPPPTQQPPPTSRSTSSSGGASASVT…	OK	9.65172	29.9763	1.63496	5.28209	5e-05	0.000445332	yes	CCR4-NOT transcription complex subunit 3 isoform X2	3.08809	1.62672	904	9.81981	0.0692392	2793	11.4455	0.213817	XP_004923656	100000
TCONS_00060341	XLOC_040469	BMgn008114	chr9:5627833-5713626	1669	TCONS_00060341:309-5315	(+)	MPFVPRAVEPKYLSRTSLRDENGKPKIADEELQAVTNCTLTNALRQLASLVLLAEDIFSELTEQLQEITIRSKAAQTKIEKINEVVINFDPKKVPVPEGSLSDFAVRKVHYTASNPHKNGLFVPDTRPPSLRKLYEKATTDRISIAILDQMRKDSHHSPYLLCTPVLSNKRRKIYQKVDVEIETHIPYVVEQLRKWTSKEAIGDVTALPDASMRIASSVTLTPDELSECGSGDDEPIDHKLPSPEEQLRVIASKFPPELVAIDTSGKFFDRMCSSRKSLHIESGNGETDTVKRRTRPRKPRGKRRNTISGTDQKELREAIAGDTTNAVASEEVEENNTVIRSQSSDLLKKSPIDPVTKKGHFNSLKQWGKNRLKLIGRSPSASRDSFKDTTKFDKSKDV…	OK	1.50817	3.56964	1.24298	2.38865	0.00025	0.00193946	yes	uncharacterized protein LOC101737722	1.25011	0.322059	737	9.51968	0.0849666	921	9.84273	0.106218	XP_012545390	100000
