# Supplementary material for: Refining a steroidogenic model: an analysis of RNA-seq datasets from insect prothoracic glands
Source: BMC Genomics. 2018 Jul 13;19:537. doi: 10.1186/s12864-018-4896-2 (PMC6045881; doi:10.1186/s12864-018-4896-2)
Supplement: Supplementary file 7 — Table S7. Tabulation of 650 loci of Bombyx mori genone whose transcript abundance in PG cells was used to determine the genes expressed in these cells. Data from Bowtie2 (column F and G) [27, 28] and Cufflinks (column D and E) was integrated with qPCR results and used to plot Fig. 1d and e. (XLSX 94 kb) [file 12864_2018_4896_MOESM7_ESM.xlsx]

## Sheet: Sheet1
Bombyx mori gene ID	Transcripts / prothoracic gland cell on V-0	Transcripts / prothoracic gland cell on V-6	FPKM on V-0	FPKM on V-6	RPGM on V-0	RPGM on V-6
BGIBMGA012386	62.47	78.64	0.342081	0.43303	0.00143495	0.00188489
BMgn000004	27.77	61.13	0.000518086	0.526849	0.00137481	0.00604918
BMgn000005	228.686	822.158	8.2626	3.83405	0.0534953	0.0312395
BMgn000016	41.56	197.45	0.10801	3.07538	0.00208473	0.0031291
BMgn000056	13.75	121.45	0.01778	0.103729	0.00870191	0.00753326
BMgn000060	32.487	19.87	0.0939176	0.0370111	0.00140218	0.000736145
BMgn000066	14136.1	297175	0	0	NA	NA
BMgn000068	0.332276	3.28668	0.60543	0.531408	0.00947563	0.00754838
BMgn000078	31.8436	309.105	1.17157	2.77906	0.0499941	0.0891224
BMgn000089	5.627	14.542	0.0238571	0.0318983	0.0274495	0.0236371
BMgn000093	245.443	1589.07	11.5449	2.49889	0.0218676	0.00707459
BMgn000152	27.99	68.5	0	0	0.00260505	0.00484398
BMgn000158	0.151501	38.0472	0.0408344	0.100652	0.00238986	0.00342893
BMgn000213	23.19	21.15	0	0	0.000225073	0
BMgn000313	0.609628	48.58	0	0.127592	0.000343867	0.000939345
BMgn000352	19.034	5.525	0.0170854	0.0190432	0.000615716	0.00100054
BMgn000354	178.27	3014.33	16.3287	25.8786	NA	NA
BMgn000368	245.904	63286.6	77.1172	0	0.817327	3.46656
BMgn000452	336.914	9840.7	12.3206	39.8933	0.144046	0.464056
BMgn000467	107.763	541.484	7.60111	2.5258	0.0650944	0.0194087
BMgn000468	242.867	3897.64	9.96551	10.852	0.386059	0.428259
BMgn000485	1415.65	7549.8	22.313	12.6163	0.106695	0.104349
BMgn000488	4.91	12.6708	1.30155	0.419598	0.00509271	0.00151937
BMgn000547	2.77918	42.6965	0.136018	0.0789503	0.00090795	0.000775885
BMgn000577	2.82	113.42	0.166282	0.0186598	0.00427664	0.000488759
BMgn000583	186.54	46.78	3.75683	0.10187	0.0114962	0.000674593
BMgn000584	162.15	594.021	8.10718	2.54254	0.111486	0.03173
BMgn000585	45.687	7.69	0.0803058	0.0180091	0.0236518	0.0271855
BMgn000586	66.79	6.58	0.192608	0.104664	0.00733798	0.00639349
BMgn000600	80.1108	3464.11	20.0023	33.1065	0.386419	0.558837
BMgn000601	61.0521	326.348	0.518013	0	0.0549492	0.0226905
BMgn000602	1315.61	5308.01	33.6671	9.31039	1.47104	0.420412
BMgn000628	285.955	1633.93	2.87386	0.194344	0.0259732	0.0059544
BMgn000640	11.55	187.65	0	1.25678	0.000572401	0.0424481
BMgn000648	18395.9	156877	0	487.297	3.24438	1.14845
BMgn000673	209.75	187.43	3.71985	2.74277	0.178382	0.163265
BMgn000674	12.992	6.582	0.0128951	0.0304551	3.81607e-05	0.000457928
BMgn000697	124.78	119.95	0.0572832	0.0685829	0.0058832	0.00502224
BMgn000705	69.543	71.582	0.399773	0.390315	0.00424989	0.00397837
BMgn000716	1901.05	214.282	17.7248	1.20278	0.0535018	0.0132363
BMgn000770	235.612	5312.55	11.3448	15.3287	0.52995	0.684957
BMgn000779	213.144	3767.4	6.34037	7.06036	0.123677	0.152915
BMgn000783	7.62932	280.402	4.7081	5.70077	0.0726002	0.0836053
BMgn000790	4.92447	489.813	4.1377	4.6603	0.0753512	0.0930487
BMgn000868	31.435	10.79	0.10862	0.388324	0.00279858	0.00342889
BMgn000871	8.59	2.31	0.0609069	0.0280117	0.000733431	0.000466729
BMgn000888	17.82	107.69	0.0415581	0.315316	0.0100027	0.0094174
BMgn000982	13.99	6.51	0	0	NA	NA
BMgn000983	1.39	3.47987	0.00528948	0.00898142	0.000332751	0.000623908
BMgn000999	10.53	2351.17	0.770795	5.90012	0.00614993	0.0418122
BMgn001003	65.32	98.54	0	0	0.000650444	0.00141567
BMgn001005	11.35	2.46	0.00435482	0	0.000144707	0.000217061
BMgn001048	70.3941	2746.81	11.8714	12.6563	0.0627281	0.0670432
BMgn001067	2.41	32.16	0	0	0.000477008	0.00133562
BMgn001079	831.485	10269.1	31.8071	16.7541	0.469961	0.243234
BMgn001085	14.521	189.52	0.0317666	1.84392	0.00604185	0.0235148
BMgn001100	175.536	635.407	22.9735	12.399	0.737448	0.395223
BMgn001162	932.406	1542.92	0	0.0773709	7.95704	0.349038
BMgn001163	14.87	35.69	0	0	NA	NA
BMgn001166	3409.29	45147.6	50.0873	26.776	2.83812	1.35334
BMgn001183	259.597	1769.72	24.6748	5.99016	0.377105	0.121125
BMgn001191	50.3336	971.945	2.05423	3.39141	0.0187005	0.0165639
BMgn001254	315.501	2588.3	5.52718	4.00563	0.134138	0.0810938
BMgn001256	25.67	96.54	0.0331813	0.0313831	0.0111821	0.0106415
BMgn001276	28.19	113.86	1.60087	2.8053	0.00742831	0.0106338
BMgn001277	1227.25	2003.01	18.813	5.84801	0.220393	0.0735066
BMgn001300	0.0150424	4.95251	0.00491631	0.01133	0.00324633	0.00399613
BMgn001314	12.36	68.73	0	0	4.64123e-05	0.000232062
BMgn001412	8.02487	1.76136	0	0.0408387	0.00672928	0.00845626
BMgn001419	2.41833	6.03008	0.614957	0.0722457	0.0447919	0.0072513
BMgn001458	62.6546	5910.99	29.1129	27.6798	0.436987	0.414387
BMgn001493	33.14	2.89	0.0232859	0.00552149	0.000412894	0.000355943
BMgn001505	7.46	35.62	3.92385	0.382789	0.0483927	0.00646401
BMgn001530	18.691	86.528	0.0298034	0.238456	0.00146574	0.00389119
BMgn001531	0.0184368	2.14021	0.0294131	0.00551078	0.00482495	0.00412751
BMgn001543	19.34	43.68	0.0104118	0.0232103	0.000640123	0.0011949
BMgn001557	24.45	42.152	0.136269	0.211691	0.00142564	0.00211718
BMgn001573	0.0274997	4.43598	0.028875	0.0535107	0.000511509	0.00107985
BMgn001609	811.76	8267.8	5.12961	8.35034	0.317363	0.527036
BMgn001678	31.3823	19000.7	57.3187	0	0.604367	20.5183
BMgn001753	147.161	1739263	17.8818	0	0.306374	391.117
BMgn001882	94.31	134.52	0.0508777	1.24477	0.0112334	0.0303989
BMgn001910	1.53	18.63	0.0202873	0.0690074	0.0228856	0.0278352
BMgn001962	34.56	13.77	0.123305	0.0435431	0.00311888	0.00113163
BMgn001988	95.7633	596.484	2.87198	1.33219	0.0170237	0.0115471
BMgn001998	1828.76	6365.69	12.309	11.4839	0.0597947	0.0570003
BMgn002024	1276.42	21141.7	44.5056	55.6239	0.185936	0.221124
BMgn002041	91.232	30.548	0.934876	0.35527	0.052039	0.0170309
BMgn002043	23.97	65.99	0.0164459	0.042806	0.00160909	0.002177
BMgn002066	7213.87	47442.7	18.4195	0	0.245315	3.80035
BMgn002079	175.614	2847.42	5.44303	6.36925	0.255428	0.261438
BMgn002085	0.86	14.89	0	0.0279672	0.00810669	0.00900744
BMgn002131	16.792	41.591	0.0158117	0.0574417	0.00202668	0.00329336
BMgn002134	11.31	41.67	0	0	0.000684375	0.00111211
BMgn002137	13.68	10.43	0.0609445	0.0257481	0.00225092	0.00249827
BMgn002138	52.5077	444.329	2.00263	1.86793	0.00832999	0.00805957
BMgn002171	2.45	16.78	0	0	0.000176143	7.04573e-05
BMgn002178	56.71	24.78	0	0.0289055	0.00127331	0.000818554
BMgn002197	45.69	92.13	0.0183831	0.0404532	0.000262235	0.000786705
BMgn002223	21.7789	141.848	1.50936	6.29634	0.0150221	0.0566519
BMgn002226	21.43	33.11	0	0	0.00358394	0.00541633
BMgn002244	52.549	39.245	0.16657	0.129499	0.00450258	0.00428944
BMgn002248	3.59	58.42	0.0323305	0.0145582	0.000841751	0.000420875
BMgn002267	34.156	58.65	0.0473335	0.810676	0.000940465	0.00441609
BMgn002268	27.783	55.64	0.0393532	0.209645	0.00177688	0.00168083
BMgn002269	41.25	89.65	0.219879	0.429773	0.00248074	0.00345998
BMgn002270	7.7035	211.594	0.773634	25.2418	0.00191812	0.0748966
BMgn002272	2.1	7.5	0.489559	31.3377	0.0022651	0.0820625
BMgn002275	18.76	0.683261	0.0120629	0	0.00345427	0.0037282
BMgn002285	31.692	42.592	0.0330129	0.0589565	0.000712251	0.0014245
BMgn002286	82.182	181.03	0.899884	1.54836	0.0194876	0.0310523
BMgn002287	33.7436	566.942	0.0740132	0.585648	0.0224398	0.0175439
BMgn002307	32.182	17.69	0.0367464	0.0351354	0.000987731	0.00106571
BMgn002316	33.947	225.121	0.0258246	0.0136778	0.00251548	0.00149224
BMgn002325	7.30919	620.8	0.0616965	0.178173	0.00763359	0.00593723
BMgn002328	14.41	5.79	0	0	9.14997e-05	0.000182999
BMgn002381	120288	2077867	0	0	152.238	110.525
BMgn002400	145.672	98.451	1.30752	1.19311	0.0207114	0.0188849
BMgn002442	5.69316	156.684	0.0657931	0.519404	0.00301154	0.00347298
BMgn002458	0.32	3.1515	0	0	0.00255814	0.00293365
BMgn002472	13.52	21.36	0.122224	0.0111033	0.0106539	0.0119383
BMgn002495	231.559	4902.07	1.87523	3.06145	0.0240746	0.0253054
BMgn002506	8.72466	74.4925	0.225445	0.228788	0.00182899	0.00192697
BMgn002532	94.1756	1633.14	1.00608	2.46938	0.0489084	0.0921007
BMgn002535	20.16	22.77	0	0.0325536	0.0046759	0.00572798
BMgn002545	65.12	34.51	0.00779337	0.0235456	0.000792393	0.00151875
BMgn002547	156.283	2832.89	4.26374	9.85713	0.299873	0.588637
BMgn002550	4.329	1.281	0.00924643	0	0.000159974	5.33248e-05
BMgn002597	10.1195	566.691	1.4027	4.62283	0.0160655	0.0455871
BMgn002661	291.054	4209.06	145.345	22.413	0.366505	0.13258
BMgn002700	14.63	147.22	0.211035	0	0.00432719	0.00041876
BMgn002714	78.61	198.54	5.41477	8.63819	0.0279181	0.0419473
BMgn002733	0.475098	42.1997	0	0	NA	NA
BMgn002767	12.31	8.43	0.044238	0.0326545	0.00215297	0.00241737
BMgn002771	46.63	104.32	0.0656663	0.131068	0.0260921	0.0179933
BMgn002824	72.14	145.28	0.138392	0.646172	0.00241477	0.0086741
BMgn002851	22.6958	388.663	1.04767	2.50803	0.0264778	0.0707102
BMgn002964	105.63	69.78	0.224686	0.0965091	0.00523627	0.00191571
BMgn003036	56.212	10.78	0.178779	0.0581305	0.00354213	0.00195749
BMgn003046	110.542	43.567	0.644518	0.214416	0.00526598	0.00141898
BMgn003099	68.93	39.87	0.485568	0.37954	0.0058754	0.00371593
BMgn003145	110.408	3953.34	7.25891	13.0966	0.0774807	0.112665
BMgn003286	2.38	56.73	0.00638317	0.494096	0.000715837	0.0061957
BMgn003293	0.189033	34.1831	0.223664	0.517603	0.0308015	0.0303953
BMgn003314	5618.63	20714.6	13.4432	16.3671	0.0543569	0.0720843
BMgn003315	6.80969	15.5857	0.369702	0.261108	0.00399504	0.00295836
BMgn003369	68.54	68.19	0	0	0.000275202	0.000444557
BMgn003394	1213.28	23801.6	95.8315	73.2482	1.9644	1.52225
BMgn003399	145.892	2332.47	22.3251	22.4869	0.148865	0.175623
BMgn003401	143.243	3095.15	30.3907	39.8421	0.351793	0.438389
BMgn003416	6.78	3.251	0.00906781	0.00817053	0.00127614	0.00242206
BMgn003418	27.46	9.56	0	0	NA	NA
BMgn003560	1084.39	3326.38	7.93477	11.3244	0.16607	0.231034
BMgn003639	20.8923	43.1074	0.215131	0.13145	0.00391369	0.00283247
BMgn003640	653.353	558.506	38.5612	6.57835	0.427113	0.0858165
BMgn003654	216.749	2106.93	10.2533	8.97667	0.0651378	0.051246
BMgn003683	16.782	19.56	0.025975	0.0296625	0.000749726	0.00058907
BMgn003684	62.89	31.41	0.569871	0.341235	0.00334573	0.00303084
BMgn003731	32.452	165.523	0.212573	1.39921	0.0149671	0.0329276
BMgn003786	38.12	204.964	5.2967e-05	0.601187	0.00421034	0.00619822
BMgn003800	119.868	734.929	3.80942	2.67863	0.0383851	0.0294971
BMgn003802	42.39	101.34	0.141276	0.355511	0.0121453	0.0266955
BMgn003813	4.14	13.21	0	0	0.000408372	0.000306279
BMgn003843	6.549	0.236	0.0213007	0	0.000233263	0.000816422
BMgn003851	259.204	19769.8	1.95486	13.1599	0.103805	0.373626
BMgn003863	1.78422	981.212	0.0808348	2.20709	0.00154229	0.00572139
BMgn003878	73.2878	1.317	0.0342415	0.0416889	0.000576037	0.000480031
BMgn003879	8.792	24.888	0.0335203	0.0064596	0.000321626	0.00012865
BMgn003908	65.77	5.61	0	0.166685	0.00227652	0.00364243
BMgn003926	172.128	130.234	5.02966	0.671199	0.0548439	0.00809476
BMgn003943	110.13	182.34	0.867252	1.30977	0.0252845	0.0127827
BMgn003944	123.42	84.24	0.949759	0.14214	0.00599685	0.00312548
BMgn003945	154.32	110.75	1.4443	1.21065	0.0107981	0.00754186
BMgn003957	14.77	42.15	0	0	0.0016514	0.00149561
BMgn003976	4074.56	5556.39	0	59.4626	2.934	0.890166
BMgn003982	57.56	98.45	0.0258981	0.0450302	0.00127311	0.00187784
BMgn004020	1341.37	18582.5	61.8898	68.9362	0.0952413	0.104793
BMgn004032	37.12	350.23	2.35733	2.16828	0.0154784	0.0192324
BMgn004033	8.15055	45.4847	0.662804	0.177398	0.0290034	0.0339653
BMgn004057	57.29	11.34	0	0	0.000555556	0
BMgn004083	73.2878	58.4329	0.0603728	0.13038	0.00767663	0.0104636
BMgn004097	107.938	366.924	0.121157	0.140974	0.000258369	0.000516739
BMgn004105	28.391	202.34	0.034429	1.22419	0.00644298	0.00863688
BMgn004118	6.20608	81.0971	0.0347607	0.0946445	0.00409496	0.00375372
BMgn004344	190.245	1493.33	9.0688	6.34304	0.0576896	0.0485128
BMgn004424	27.1679	11.7545	0.158986	0.00921498	0.00261835	0.00221237
BMgn004428	0.150334	2.91962	1.13807	0	0.198921	1.94231
BMgn004513	8.95991	483.67	3.17188	5.21556	0.0765816	0.114966
BMgn004624	13.67	5.51	0.0164094	0	0.00146541	0.00135411
BMgn004625	17.46	565.81	1.75653	2.73108	0.0101985	0.0163313
BMgn004639	299.912	10465	12.7412	65.206	0.174805	0.894888
BMgn004678	12.897	23.13	0.0452206	0.0333903	0.000606061	0.00185383
BMgn004714	4.16	23.12	0	0	NA	NA
BMgn004715	13.59	3.145	0	0.010622	0.000180766	0.000180766
BMgn004716	20.34	34.77	0	0.0199777	0.00209908	0.00122128
BMgn004717	12.89	28.97	0	0.0226386	0.00156222	0.0019193
BMgn004718	25.31	42.19	0	0	0.000242645	0.000363967
BMgn004720	22.59	30.03	0.0398443	0.0295214	0.0015508	0.0025699
BMgn004721	14.365	16.48	0.0110283	0.0145182	5.78402e-05	0.000231361
BMgn004748	84.25	177.54	0.23381	0.748381	0.00440545	0.00495728
BMgn004759	21.21	14.592	0	0.0141583	0	0.000121655
BMgn004770	13.141	8.549	0.0134605	0.0112133	0.0013624	0.000363306
BMgn004778	6.82623	96.2488	0.0133558	0.00469398	0.0133266	0.0103869
BMgn004852	2244.37	14675.2	46.5318	80.0868	0.462352	0.793154
BMgn004952	32.6708	444.895	4.01268	6.40918	0.125365	0.191822
BMgn004952	66.2611	5279.37	4.01268	6.40918	0.125365	0.191822
BMgn005082	78.543	288.38	0.937716	2.32004	0.0238297	0.0263753
BMgn005119	61.4753	218.941	1.25436	1.26935	0.0152733	0.0102683
BMgn005170	45.632	23.156	0.26616	0.120307	0.00137603	0.000966938
BMgn005189	14.9366	42.9155	1.65008	1.86747	0.00977054	0.00830556
BMgn005195	6.29533	50.6237	0.112102	0.0238645	0.00159483	0.000473043
BMgn005235	12.13	27.18	0	0	0.0189394	0.0215774
BMgn005272	11.543	37.529	0.0755501	0.333656	0.00250627	0.00694919
BMgn005346	235.635	1036	9.57639	7.4085	0.0574389	0.0465607
BMgn005356	991.24	534.613	25.0841	2.79686	0.202795	0.0309212
BMgn005365	31.12	106.21	4.60569e-06	0.502878	0.000166677	0.00495864
BMgn005375	5.681	0.895	0.012406	0	0.000172921	0
BMgn005376	4.998	14.529	0.00750032	0.0366402	0.00125918	0.00202868
BMgn005420	44.519	33.145	0.0126116	0.028115	0.000776264	0.00158128
BMgn005431	41.15	23.51	0	0	0.00016621	8.31048e-05
BMgn005477	651.574	1331.92	12.4815	10.3776	0.273077	0.231718
BMgn005482	45.8382	2760.49	0.793141	6.83373	0.0105139	0.0989991
BMgn005496	1198.84	86648.2	0	0	2.21929	1.83813
BMgn005576	203458	337489	0	0	52.1891	20.6552
BMgn005583	107.861	1870.69	13.4874	11.2101	0.39778	0.326134
BMgn005643	262.691	2414.59	28.9626	13.7129	1.15849	0.542865
BMgn005692	0.367206	50.2636	0.00479676	0.0762162	0.00297245	0.00263753
BMgn005707	10.6777	87.099	0.233488	0.101747	0.0134832	0.0105462
BMgn005714	62.0831	1906.66	2.81815	7.96742	0.0192806	0.0654118
BMgn005757	2.314	24.77	0.0136263	0.0422606	0.000150707	0.000798746
BMgn005797	1141.35	11065.9	23.66	12.9459	1.15093	0.636111
BMgn005818	0.65	3.42	0.115374	3.10388	0.000484496	0.00209948
BMgn005825	12.432	31.85	0.0471209	0.119831	0.00191798	0.00473853
BMgn005847	38.5802	315.011	1.24527	1.22765	0.0378363	0.057807
BMgn005910	1.47856	108.695	0.032052	0.0408832	0.00128361	0.00158762
BMgn005914	31.2135	328.205	1.13908	1.48677	0.0183576	0.0203803
BMgn005935	310.072	6534.48	14.2306	33.738	0.366248	0.861111
BMgn005972	95.5369	2014.6	0.174445	0.0533163	0.00255533	0.000958248
BMgn005985	87.3325	1374.21	5.07566	7.42847	0.18689	0.264932
BMgn006002	83.24	186.65	0.251395	1.58882	0.000103327	0.000309981
BMgn006047	1567.89	9515.09	16.7743	26.8143	0.35636	0.521553
BMgn006049	13.16	4.79	0	0	8.67152e-05	0
Bmgn006150	28.45	34.52	10.8532	13.9617	0.000261883	0.00336083
BMgn006151	3.09281	172.8	10.3052	3.56486	NA	NA
BMgn006183	3118.36	21977.8	57.4819	42.5387	0.407782	0.260661
BMgn006212	6.782	3.529	0.0431924	0.0221685	0.00086815	0.00162778
BMgn006226	463.336	5698.68	38.4874	26.7024	0.288653	0.273408
BMgn006244	30.345	22.591	0.0448096	0.0338355	0.0030819	0.00336378
BMgn006257	441.29	22114.7	60.3808	111.19	0.0647308	0.118724
BMgn006279	52.695	23.425	0.180638	0.0991026	0.00134786	0.00142274
BMgn006348	23.0057	567.944	0.60494	4.16398	0.0113523	0.0680195
BMgn006352	56.781	25.688	0.424698	0.264066	0.0140474	0.00775807
BMgn006361	1.13958	41.2831	0.0253729	0.070119	0.00487808	0.00587663
BMgn006367	53.1947	581.155	3.99424	4.14805	0.0237071	0.0271573
BMgn006532	16.754	119.65	0.0461205	0.849574	0.00561334	0.0312036
BMgn006544	2.84992	21.3383	0.107116	0.205684	0.00499641	0.00455119
BMgn006555	842.018	12899.6	18.8632	14.4183	0.299827	0.21962
BMgn006572	36.0322	167.613	0.468409	1.23857	0.00577401	0.0178699
BMgn006582	50.7089	2055.09	1.85659	4.96769	0.031845	0.0792346
BMgn006593	0.356868	15.1469	0.043696	0.0829465	0.00757121	0.0110421
BMgn006597	5.78	58.93	0	0.0485859	0.00018111	0.000724441
BMgn006598	31.45	39.56	0	0	7.44879e-05	0.000148976
BMgn006603	2134.46	11955.3	52.931	58.2848	1.88209	1.34054
BMgn006616	811.76	8267.8	0	25.0679	0.522482	0.489139
BMgn006624	12.45	132.45	0.0224596	0.424961	0.00934176	0.013048
BMgn006625	0.38	14.52	0	0	0	0.000405515
BMgn006655	1431.05	6534.67	101.745	22.9936	1.06731	0.246243
BMgn006657	72.16	79.25	0.270785	0.234147	0.00790664	0.0104535
BMgn006675	3.6722	22.6283	0.0495344	0.262696	0.00212287	0.00334195
BMgn006691	5.36225	58.1676	0	0.0209835	0.114184	0.199787
BMgn006712	68.241	836.21	5.22377	6.36945	0.0536892	0.0563619
BMgn006716	13.79	70.43	0.0240154	0.134948	0.00249332	0.00259613
BMgn006717	31.42	119.54	0.0672943	0.386114	0.00253663	0.00527352
BMgn006724	604.347	5725.77	0	39.2406	0.220764	0.163816
BMgn006766	1945.96	26543	22.633	41.7617	0.138119	0.248227
BMgn006799	149.53	70.34	0.496453	0.0787635	0.00742071	0.00592061
BMgn006801	269.956	573.593	1.06173	1.79108	0.0165164	0.0245482
BMgn006807	620.814	9233.07	21.3777	17.2246	0.282952	0.226269
BMgn006817	95.427	2317.93	3.67398	6.96033	0.0495371	0.085225
BMgn006850	1520.73	30606.7	96.5167	85.4801	2.96456	2.60116
BMgn006865	486.659	7224.1	92.7814	47.0509	0.951547	0.488644
BMgn006878	1959.08	8909.36	41.2976	37.6301	0.899816	0.638457
BMgn006891	260.915	4915.07	13.8608	12.6321	0.122183	0.127614
BMgn006915	59.527	15.23	0.489389	0.191201	0.00722074	0.00422888
BMgn006916	521.062	1047.2	0	17.0882	9.74331	0.217975
BMgn006922	33.451	2.582	0.16757	0.00646742	0.00135499	0.00130405
BMgn006929	86.3171	541.153	2.87368	0.562376	0.0193897	0.00342723
BMgn006936	214.277	184523	72.0901	0	0.558657	11.625
BMgn007009	30.451	17.683	0.11309	0.0732131	0.00401795	0.000977782
BMgn007017	329.082	9501.68	20.8581	24.8468	0.922331	1.17297
BMgn007034	356.861	12166.4	3.95289	6.9649	0.0645194	0.10304
BMgn007047	2223.26	98989.7	225.707	450.963	1.92606	4.03783
BMgn007070	45.67	32.89	0	0.105099	0.00875547	0.00396081
BMgn007139	706.569	15049.4	33.4798	42.9588	0.375051	0.494389
BMgn007166	34.4892	37.361	0.0168849	0.00648583	0.00433024	0.00505258
BMgn007168	24.765	69.43	0.0198901	0.12218	0.00105208	0.00220936
BMgn007184	4.56	42.13	0.0547015	0.0219815	0.00568193	0.00726233
BMgn007195	67.24	43.1	0.627213	0.0751658	0.0130451	0.00173326
BMgn007273	31.1056	145.847	0.366631	0.377408	0.00417549	0.00517525
BMgn007310	2938.18	8537.47	39.2761	91.9009	0.161094	0.391692
BMgn007338	159.23	44.688	1.217	0.563081	0.026002	0.0228739
BMgn007347/BK005944	1.67	5.41	0.0244498	0	0.00865152	0.00722882
BMgn007347/BK005945	2.49	9.03	0.0244498	0	0.00865152	0.00722882
BMgn007355	568.668	16636.3	35.4854	83.3522	0.738311	1.2691
BMgn007383	51.35	55.56	0.50114	0.598893	0.00281387	0.00419086
BMgn007389	29.65	53.41	0	0	NA	NA
BMgn007466	11120.1	3739.41	0	75.4208	10.337	0.753983
BMgn007477	23204.3	506740	0	0	33.2508	36.9237
BMgn007489	192.477	1873.97	10.7911	13.7186	0.152022	0.194943
BMgn007490	1894.63	273602	281.314	649.101	5.45949	12.8422
BMgn007492	22.14	97.56	0.119217	0.600074	0.000801399	0.00271779
BMgn007540	166.914	3238.2	20.9783	15.218	0.150062	0.122051
BMgn007588	3.24	16.22	0.0181548	0.051875	0.000969274	0.00155084
BMgn007629	138.996	18256.4	28.4065	195.579	0.0177949	0.129701
BMgn007757	159.79	27.626	1.98211	0.24194	0.00632895	0.00299296
BMgn007786	23.415	43.15	0.0952123	0.0576054	0.00326921	0.00150886
BMgn007787	5.15	8.14	0	0.00658677	0.000324097	0.000162048
BMgn007789	1289.26	4255.71	14.1717	16.0716	0.135627	0.180568
BMgn007794	89.569	34.526	0.555819	0.1769	0.00395273	0.00105544
BMgn007837	67.4952	97.3868	0	0.0148324	0.00613007	0.00747013
BMgn007887	3.13071	39.2902	0.0578256	1.22932	0.00283095	0.00650695
BMgn007897	3.17208	3.45512	0.0295252	0.0365821	0.00209896	0.00169038
BMgn007929	14.7348	980.678	0.771012	5.33717	0.00408422	0.0242901
BMgn007930	31.7	56.69	8.13074	0.121764	0.0688951	0.00545406
BMgn007950	4098.77	42232.4	129.325	335.598	2.97383	7.67952
BMgn007957	1061.46	4310.42	19.9242	8.13233	0.0574763	0.022939
BMgn007963	28.5698	893.152	5.13844	7.79812	0.100687	0.0921295
BMgn007980	2.44563	43.366	0.403863	0.155901	0.0107614	0.00538068
BMgn007996	8.521	13.418	0.0473248	0.0600683	0.0143737	0.00988366
BMgn008036	34.2238	521.495	0.808497	0.352877	0.00948534	0.00703751
BMgn008039	10.115	29.995	0.0618752	0.0835751	0.00245861	0.00240176
BMgn008065	35.1808	19.5862	0.00987801	0.00510701	0.000881501	0.00113336
BMgn008236	1.18698	52.1576	1.13292	1.05675	0.361849	0.360865
BMgn008238	459.085	1574.27	24.1905	18.9959	0.838557	0.635604
BMgn008272	17.89	14.54	0.00642453	0	0.00401415	0.003823
BMgn008273	25.691	12.415	0.0617487	0.0257555	0.000939099	0.00227732
BMgn008283	135.353	2560.82	9.14482	12.1798	0.0391402	0.0521751
BMgn008304	1131.5	27392.4	48.7196	40.9223	0.404412	0.369121
BMgn008322	11.58	115.62	0.254321	1.09293	0.00771605	0.0339506
BMgn008348	20.18	28.44	0.00749725	0.00143939	0.000197531	3.29218e-05
BMgn008348	14.78	28.61	0.00749725	0.00143939	0.000197531	3.29218e-05
BMgn008375	21.692	44.526	0.0366895	0.0690099	0.000831255	0.00115097
BMgn008437	41.59	33.66	0.0921614	0.128026	0.00246782	0.00249524
BMgn008486	4.12	18.65	0	0	0.000407664	0.000407664
BMgn008534	38.6118	958.515	6.89728	7.3105	0.0533065	0.0576843
BMgn008552	72.0398	497.011	2.75802	1.92949	0.0174436	0.0134078
BMgn008559	14.562	3.249	0.0257084	0	0.000442674	0.000467267
BMgn008597	36.1706	285.371	0.659337	0.285099	0.00992993	0.00620621
BMgn008723	564.89	4682.5	22.991	8.9357	0.263771	0.131885
BMgn008802	1.09478	284.932	0.23109	4.39373	0.0105661	0.0205967
BMgn008840	13.15	24.156	0.0171093	0.0402895	0.00162136	0.00238436
BMgn008849	146.543	134.245	1.02016	1.31579	0.00625377	0.00732746
BMgn008851	52.2483	473.147	0.440264	0.297308	0.345807	0.162956
BMgn008884	315.442	2821.37	21.8418	23.8398	0.378539	0.390667
BMgn008933	26.4408	57.5662	0.303198	0.322747	0.00384574	0.00391696
BMgn008952	61.8005	1409.33	6.51059	5.99994	0.0918942	0.101129
BMgn008955	7228.29	259366	356.391	0	2.43105	7.34274
BMgn008986	270.585	794.892	10.8594	8.19982	0.190951	0.0955615
BMgn009006	27.947	1.99222	29.1848	1.9525	0.900253	0.0527528
BMgn009019	0.72	4.44	0	0.156726	0.00327837	0.0033748
BMgn009039	1.40558	20.0103	0.0241998	0.010728	0.00306621	0.00421446
BMgn009045	3500.09	10306.4	32.5632	17.1227	0.388081	0.0729661
BMgn009049	370.012	34226.8	41.4631	0	0.409644	0.839826
BMgn009076	19.78	67.42	0	0	0.000459929	0.000804875
BMgn009081	15.291	72.399	0.122939	0.704672	0.00325521	0.0129557
BMgn009133	2919.92	86118.4	220.519	143.774	0.394695	0.255352
BMgn009134	23.3308	1115.8	13.4021	12.4187	0.113777	0.110024
BMgn009172	33.44	95.43	0.106472	0.39538	0.00491017	0.0101551
BMgn009254	291.471	10856.2	24.6467	43.5006	0.123535	0.188546
BMgn009272	6.791	68.791	0.0380623	0.668052	0.00207941	0.00680059
BMgn009273	4.15	12.581	0.0570021	0.0899955	0.00198582	0.00243972
BMgn009275	34.52	59.78	0.0366418	0.146084	0.00361141	0.00455038
BMgn009306	2.17	5.43	0.00171804	0.000529246	0.000798103	0.00114015
BMgn009499	1.592	25.621	0.0497202	0.0183949	0.00930103	0.0164386
BMgn009521	18.54	41.42	0.178461	0.276499	0.00934611	0.01088
BMgn009523	0.158132	1.31783	0.123765	0.0345973	0.00577713	0.00557743
BMgn009529	16.4152	502.387	7.91806	13.4714	0.088561	0.147793
BMgn009538	15.632	2.391	0	0.0315728	7.13929e-05	7.13929e-05
BMgn009604	206.38	254.35	1.21576	1.73484	0.0143545	0.0198325
BMgn009697	279.918	3299.36	4.6044	3.3054	0.0396779	0.031312
BMgn009790	97.7222	3835.99	7.04046	12.5661	0.0421325	0.0767693
BMgn009799	258.608	94564.6	19.1593	375.369	0.0571084	1.135
BMgn009810	97.54	178.54	0.92876	1.22242	0.00970335	0.0115831
BMgn009865	0.909303	154.197	0.0108035	0.0326572	0.000809249	0.00123314
BMgn009867	44.52	20.34	0	0	0.000354158	0.000708316
BMgn009886	35.6868	81.6782	0.7278	0.8102	0.0117689	0.0120825
BMgn009926	18.6288	659.801	0.577509	0.974212	0.0052856	0.00754195
BMgn009949	1.34049	1098.22	0.0550239	30.0584	0.00447144	0.222307
BMgn009960	334.502	11028.6	0	22.682	0.658908	0.0803347
BMgn010037	100.102	394.343	6.83067	4.03736	0.0333821	0.0177648
BMgn010059	2.359	4.23	0.00836045	0	0.000278552	0
BMgn010085	2.91	32.19	0	0	0.00111436	0.00167154
BMgn010090	69.335	1745.28	0.62368	2.21927	0.00384472	0.00490468
BMgn010091	227.767	5253.63	0.852647	30.4897	0.00381586	0.0824415
BMgn010180	150.838	8709.69	10.0209	12.6672	0.175611	0.214863
BMgn010239	0.361156	10.7759	0.021388	0.368785	0.000641026	0.00228938
BMgn010241	9.51867	70.0485	0	0	0.00110777	0.000994328
BMgn010244	0.79	5.64	0	0	NA	NA
BMgn010296	11.33	17.62	0.538975	0.722938	0.0217202	0.0224443
BMgn010301	24.57	11.11	0	0	0.000438885	0.00087777
BMgn010304	3.58	12.4	0	0.0316445	0.000169319	0.000790157
BMgn010342	213.694	2133.43	7.33767	7.6007	0.0456184	0.0480239
BMgn010397	570.933	3777.89	14.0871	11.7188	0.153162	0.1282
BMgn010416	176.938	2321.41	7.75161	5.63692	0.0282066	0.0229138
BMgn010429	28.943	85.32	0.0425856	0.162031	0.000870484	0.00155444
BMgn010435	2228.87	18070	52.1502	46.0348	0.239253	0.222852
BMgn010453	11.692	45.69	0.198662	0.212732	0.00467672	0.00544838
BMgn010454	67.56	203.14	0.108284	1.39964	0.00227034	0.00787123
BMgn010460	4.93847	69.737	0.00332919	0.00786283	0.000932105	0.00639763
BMgn010461	705.718	8709.9	33.6016	35.8263	0.225299	0.246597
BMgn010521	15.21	54.25	0	0.0412874	0.000636075	0.000969256
BMgn010599	55.69	69.54	0.117981	0.278048	0.0115971	0.0205434
BMgn010605	6.77654	117.847	0.805244	1.59222	0.0191418	0.0238091
BMgn010609	32.57	26.74	0.0676568	0.0703441	0.00142071	0.00177588
BMgn010612	19.8879	538.061	1.2752	4.61029	0.00988312	0.0238793
BMgn010783	167.809	826.228	7.4542	9.05963	0.0425889	0.0610999
BMgn010814	181.02	279	52.0998	0.470807	0.633822	0.0140762
BMgn010821	5.621	108.695	0	0.00714259	0.000505476	0.000861181
BMgn010828	131.012	749.875	7.17141	8.21833	0.0426212	0.0589462
BMgn010854	21.596	10.2	0.25982	0.0427768	0.00572306	0.000977108
BMgn010865	23.14	27.81	0	0	0.000845897	0.00154252
BMgn010869	32.8188	422.272	0.148834	0.00104233	0.00137982	0.000941994
BMgn010882	46.72	7.891	0.0102669	0.00925013	0.000285694	0.000142847
BMgn010893	0.95	21.41	0	0	0.000487972	0.000487972
BMgn010894	13.4427	2.90248	0	0	0.00142892	0.00182375
BMgn010994	176.582	4154.07	4.26144	17.9965	0.100402	0.473896
BMgn010995	1.45667	720.846	0.012115	0	0.00022553	0
BMgn011034	640.346	2964.63	0	0	0.0499434	0.0250587
BMgn011037	2.315	3.19	2.80482	50.8528	0.00265775	0.0434671
BMgn011037	37.5991	351.194	2.80482	50.8528	0.00265775	0.0434671
BMgn011067	1.77902	73.9086	0	0.193345	0.00185835	0.00288084
BMgn011082	1241.16	8050.77	10.2981	28.6072	0.354208	0.987829
BMgn011084	34.159	65.241	0.233938	0.573313	0.00748681	0.018717
BMgn011085	156.29	204.25	1.08068	1.34714	0.0339603	0.0420585
BMgn011159	65.0658	955.631	11.0963	12.8571	0.130899	0.169508
BMgn011216	3.25	11.89	0	0.0044011	3.37929e-05	3.37929e-05
BMgn011251	295.947	4664.36	3.71652	5.25688	0.0431687	0.0576101
BMgn011291	10.18	105.6	0.0022771	0.212935	0.00128901	0.00294985
BMgn011318	206.462	1978.96	3.68969	5.53935	0.0885812	0.137747
BMgn011429	388.836	981.531	41.6756	134.444	0.0480226	0.173258
BMgn011447	7.56	14.256	0.00954451	0.0125622	0.000267738	0.000267738
BMgn011512	2926.74	13661	17.8523	15.5882	0.234255	0.211548
BMgn011527	90.6118	134.482	5.62157	0.816521	0.0731096	0.0101193
BMgn011531	14.1388	334.399	0.326457	0.368419	0.0169174	0.016658
BMgn011535	74.5434	265.42	0.147063	0.302872	0.00225187	0.00626608
BMgn011545	35.69	105.69	0.0115543	0.0630701	0.000261131	0.00130565
BMgn011554	6.79	187.54	0.0890926	1.38853	0.000918333	0.0059077
BMgn011579	0.58	15.69	0	0	0.00385848	0.00320595
BMgn011685	3.3826	4.10092	0	0	0.000272109	0.000272109
BMgn011691	167.4	1019.59	4.19945	3.41507	0.0971198	0.0917011
BMgn011708	12.4	8.44	0.0061991	0.0523319	0.000442997	0.000575897
BMgn011807	7.192	18.525	0.0337494	0.0716479	0.0113318	0.0144329
BMgn011852	252.811	4098.64	11.3783	20.9268	0.0776562	0.132783
BMgn011877	7713.76	58612.3	102.699	65.1406	0.701956	0.501848
BMgn011918	10.0221	1171.08	0.0394356	1.45964	0.00620744	0.0214043
BMgn011934	21.0124	437.853	0.379826	6.11238	0.00381827	0.0200359
BMgn011982	101.104	237.109	10.7146	5.06731	0.118492	0.0548889
BMgn012041	2.54034	237.155	0.0829515	0.0655901	0.00550247	0.00577872
BMgn012087	4.691	2.589	0.363916	0.178434	0.00195871	0.00132048
BMgn012089	49.291	32.43	0.0309911	0.0212564	0.00916063	0.00759835
BMgn012104	0.640871	1.34	0.0296251	0	0.000537968	0.000786261
BMgn012112	0.106576	16.5652	0.0162702	0	0.000502513	0
BMgn012114	31.8395	2109.77	0.60422	2.45461	0.0207587	0.0220829
BMgn012152	372.105	13658.7	53.2643	64.5666	0.151273	0.185616
BMgn012241	187.547	40774.7	5.01309	14.0107	0.0387885	0.0829473
BMgn012270	227.66	2401.25	7.84234	9.68412	0.0869965	0.160138
BMgn012274	32.14	11.7545	0.00753865	0.00679343	0.000420698	0.000233721
BMgn012362	196.54	154.25	0.988868	0.782461	0.0360391	0.0325849
BMgn012385	31.765	175.43	0.342081	0.43303	0.00143495	0.00188489
BMgn012453	19.3156	314.379	0.482701	0.617198	0.00555291	0.0106122
BMgn012456	59.67	31.15	0	0	0.000252334	0.000504668
BMgn012457	2.71079	25.61	0	0	0.00433763	0.012526
BMgn012469	51.68	24.68	0.461583	0.177899	0.0065688	0.00227897
BMgn012488	118.705	989.209	1.84132	2.96218	0.0639381	0.0721269
BMgn012492	418.924	5278.01	23.0485	29.9727	0.2327	0.313649
BMgn012538	152.125	4769.57	19.7627	17.5792	0.186848	0.123114
BMgn012539	3.13	7.96	0.147679	0.0616872	0.00131883	0.000659413
BMgn012597	25.62	39.13	0	0	0.000472255	0.000314837
BMgn012667	26.73	2.15	0.107362	0	0.00163961	0.0114773
BMgn012674	2636.55	53738.1	325.395	364.404	2.91053	3.21798
BMgn012730	11.4	4.97281	0.116246	0.0413639	0.00142936	0.00135312
BMgn012735	11.56	110.22	0.0311846	0.324991	0.00549429	0.00889363
BMgn012745	19.0388	72.3424	0.0101483	0	0.00393679	0.00382787
BMgn012747	24.51	51.69	0	0	0.0296134	0.0244999
BMgn012784	247.661	2032.12	0	0	0.056299	0.0420563
BMgn012826	696.796	4791.57	7.99601	9.03484	0.289136	0.31284
BMgn012831	143.876	86.34	1.57655	0.898211	0.00563579	0.00328754
BMgn012849	15.492	24.15	0.143138	0.206208	0.00545711	0.00828197
BMgn012882	4.18	16.728	0.00644678	0.018285	0.00499959	0.00549135
BMgn012922	483.377	7985.48	13.7844	26.2386	0.158338	0.296928
BMgn012949	21.293	2.592	0	0.0219815	0	0.000902731
BMgn012991	231.722	514.463	5.15398	0.952873	0.0475856	0.00689986
BMgn013012	18.34	68.42	0	0.0217956	0.000367217	0.000834585
BMgn013156	15.167	2.341	0.0116181	0.0360428	0.000272889	0.000409333
BMgn013176	0.78	26.11	0	0	0.00329138	0.0040981
BMgn013221	27.995	166.795	0.0336659	0.0253187	0.0101435	0.00890648
BMgn013236	727.248	16407.2	105.36	80.3991	2.05891	1.52243
BMgn013237	348.817	15372.8	7.99009	5.41369	0.472061	0.248826
BMgn013238	5.66	3.14	0.0293842	0.0919059	0.0140693	0.00324675
BMgn013239	16.51	20.19	0.0318329	0.00754791	0.0016835	0.0002405
BMgn013240	10.342	6.28	0.012209	0	0.000755858	0
BMgn013241	0.0638587	35.42	0.0768029	0.0251391	0.00232984	0.000832085
BMgn013246	59.61	9.15	0	0	0.000841097	0.0010352
BMgn013257	0.57194	61.3269	0.0187139	0.0746151	0.000100231	0.000467742
BMgn013274	617.926	941.333	2.78308	0.572283	0.0551064	0.0105319
BMgn013297	33.6672	371.265	1.90026	2.27233	0.0311731	0.0294502
BMgn013343	139.052	2459.88	12.8984	28.3532	0.234323	0.337205
BMgn013344	5.81983	45.621	0.0652078	0.224222	0	0.001221
BMgn013346	4.45571	225.049	0.0329497	0.305826	0.0012352	0.00309865
BMgn013348	1246.8	11373.6	50.118	55.9128	0.562823	0.629413
BMgn013356	15.78	45.62	0.0149654	0.293598	0.000919794	0.00253863
BMgn013363	147.556	305.189	7.37455	7.38857	0.0929208	0.104141
BMgn013368	0.322921	0.990437	0.0139251	0.00984856	0.00205116	0.00189185
BMgn013382	498.65	253.12	3.74481	3.47879	0.0316806	0.024775
BMgn013392	795.323	4308.12	0	0	0.0599797	0.0287525
BMgn013403	2.47	12.853	0.972106	0.877807	0.00553572	0.00548965
BMgn013581	110.541	175.623	1.09726	1.45538	0.0288465	0.0399273
BMgn013608	68.3261	1423.04	13.1527	9.92465	0.0880156	0.066393
BMgn013619	3.456	3.416	0	0.0179205	0.000870322	0.000632961
BMgn013640	0.176007	23.41	0.00514422	0.00532038	0.000311901	0.000490131
BMgn013697	21.54	89.31	0	0	0.000214087	0.000249768
BMgn013702	11.004	27.491	0.0416108	0.294345	0.00638821	0.00794431
BMgn013762	13.41	9.442	0.573404	0.320226	0.0186235	0.010292
BMgn013763	3.67	6.799	0.0238633	0.0105168	0.00198756	0.000961723
BMgn013764	2.52	3.415	0.0666613	0.0606796	0.00141044	0.000822755
BMgn013820	32.415	57.152	0.146783	0.29331	0.00229803	0.0044271
BMgn013821	13.415	22.341	0.182307	0.234702	0.00698218	0.00628104
BMgn013935	519.266	1874.77			0.060866	0.0146364
BMgn014042	10.41	143.45	0.00184596	1.07003	0.0193597	0.0206026
BMgn014043	19.84	11.46	0.0836699	0.378281	0.000782779	0.000626223
BMgn014046	27.82	109.45	0.185969	0.306621	0.00853634	0.00323382
BMgn014073	12.55	145.01	0.128958	0.322558	0.0026266	0.00922363
BMgn014128	12.41	56.942	0	0	0.0105438	0.0127701
BMgn014131	1262.1	3899.34	32.17	5.88505	1.65504	0.276163
BMgn014160	41.5946	548.878	3.23649	4.57902	0.0766215	0.100233
BMgn014186	2.591	16.526	0.00849055	0.0221842	0.000784264	0.00152614
BMgn014225	16.798	0.943	0.00951043	0	0.000319285	0.000319285
BMgn014229	63.1	33.21	0	0	0	9.87947e-05
BMgn014230	0.97	23.54	0	0	0.00128149	0.00302239
BMgn014256	23.18	19.11	0.00655731	0.00590951	0.000222668	0.000445335
BMgn014261	0.402921	16.6201	0.0194478	0.0691073	0.000603646	0.000796813
BMgn014273	14.51	59.03	0	0	0.00119085	0.00108729
BMgn014316	13.56	68.13	0	0	NA	NA
BMgn014370	206.825	3805.91	1.65606	1.8942	0.360406	0.246424
BMgn014373	27.6761	321.06	0.0653816	0.056044	0.30196	0.181125
BMgn014432	4.58	5.429	0.0215524	0.032413	0.000952109	0.00114253
BMgn014433	4.516	4.052	0.00704613	0.00812064	0.000620299	0.000387687
BMgn014506	0.45	20.056	0.195887	0	0.00290057	0
BMgn014536	9372.37	11502.5	0	1.46676	18.9434	0.0747614
BMgn014562	215.115	1715.24	2.91575	14.4489	0.0187678	0.0990849
BMgn014699	15.61	37.234	0.0280972	0.357493	0.00122404	0.246208
BMgn014730	27.32	29.57	0.00810044	0.0156729	0.00119474	0.00132749
BMgn014838	77.7091	2218.36	2.33943	2.81554	0.0174805	0.0247505
BMgn014861	122.427	6033.06	11.3207	19.5387	0.0444308	0.0780298
BMgn015093	53.78	21.39	0.0079388	0	0.000262467	0
BMgn015094	19.32	29.42	0	0	NA	NA
BMgn015095	0.69	5.64296	0.0284826	0.0367813	0.00146915	0.00163239
BMgn015100	51.4895	2020.19	0	0	0.0225645	0.0125874
BMgn015194	0.56	11.32	0	0	5.37288e-05	0
BMgn015195	5.68	55.19	0	0	0.00010469	0.00041876
BMgn015300	198.683	89.43	1.4222	0.610251	0.00566239	0.00235043
BMgn015347	6.29	11.19	0	0.0223473	0.00588118	0.00618022
BMgn015369	19.43	21.146	0.0189709	0	0.00711515	0.00859116
BMgn015382	247.273	3183.76	3.21654	12.8312	0.0236512	0.0689495
BMgn015542	24.76	41.04	1.23065	1.48167	0.0176201	0.0244088
BMgn015573	22.41	1.48	0	0	0.00013328	6.664e-05
BMgn015576	31.41	18.628	0.135376	0.0863986	0.00650846	0.00370482
BMgn015619	69.1333	2970.05	9.61757	13.9252	NA	NA
BMgn015621	266.625	7050.04	20.1577	26.592	0.0814314	0.12171
BMgn015623	371.591	3017.9	22.7968	13.9389	0.296053	0.185671
BMgn015819	45.61	42.58	26.6402	28.8533	0.0985935	0.11083
BMgn015849	42.67	23.79	0.0156357	0	0.000204599	0.000204599
BMgn015878	175.46	87.58	1.10075	0.979578	0.0183653	0.016974
BMgn015908	68.166	383.257	0.0166943	0	0.00391683	0.00426243
BMgn015927	38.5606	1011.85	17.969	25.107	0.262295	0.34188
BMgn016015	1.14	3.54	0	0.00955713	0	0.000524934
BMgn016016	21.34	35.68	0	0	0.000252143	0.000252143
BMgn016059	20.0145	89.8118	0	0.00604377	0.00546375	0.00658032
BMgn016173	46.592	186.54	0.307407	0.823977	0.00205553	0.00395493
BMgn016295	46.31	42.68	0	0.00964291	0.0161833	0.0136159
BMgn016296	2.98	39.41	0	0	0.00030027	0.000967537
BMgn016341	18.45	9.78	2.26632	0.0943941	0.00384468	0.000768935
BMgn016409	3.592	5.682	0.060926	0.00706167	0.0018018	0
BMgn016518	0.158	13.42	0.0340562	0.0244082	0.00130227	0.00144697
BMgn016556	228.682	93071	28.2533	119.626	0.0394975	0.197945
BMgn016743	13.221	8.591	0.0148416	0.0472407	0.00568737	0.00768684
BMgn016745	8.29	4.97	0	0	0.00625652	0.0139903
BMgn016771	1.31	16.79	0	0	0.000129099	0.000258198
BMgn016872	0.300669	2.03707	0.376452	0.887659	0.00611071	0.0127007
BMgn016923	0.984	1.345	2.10563	10.563	0.0144868	0.0665573
BMgn017127	61.42	65.63	0.239898	0.260882	0.00493283	0.0054576
BMgn017181	7.89	16.626	0	0.0121118	0.000435445	0.000489876
BMgn017182	21.56	8.543	0.563388	0.123121	0.0246327	0.0177707
BMgn017183	3.15	42.1	0	0	0.000258098	0.00148406
BMgn017238	46.78	67.89	0.471557	0.65502	0.0434206	0.0509621
BMgn017332	16.81	32.18	0	0	0.000204703	0.000307055
BMgn017437	1433.25	1916.6	38.5519	16.1711	0.192291	0.103454
BMgn017471	2.192	7.824	0.0168523	0.0296062	0.000285878	0.000285878
BMgn017519	51.32	4.562	0.0198193	0	0.000435958	8.71916e-05
BMgn017553	294.872	7473.6	24.7854	57.9215	0.726154	1.69641
BMgn017576	34.15	29.34	0	0	0	0
EU769123	6.12	2.81	-	-	-	-
KAIKOGA000851	0.342	4.51	-	-	-	-
KAIKOGA000852	14.11	13.4	-	-	-	-
KAIKOGA001526	3507.83	2949.3	30.3858	3.25619	0.213482	0.0807441
KAIKOGA001739	18.79	6.59	-	-	-	-
KAIKOGA006265	280.193	4475.86	11.1382	10.7777	0.418446	0.368692
KAIKOGA006380	8.53649	58.2141	0.254321	1.09293	0.00285638	0.0140162
KAIKOGA007703	553.401	4993.11	16.9305	3.47324	0.0794836	0.0351974
KAIKOGA008392	15.63	18.43	-	-	-	-
KAIKOGA014742	21.59	18.93	-	-	-	-
KAIKOGA014744	10.19	26.54	-	-	-	-
KAIKOGA016642	5.67	9.21	-	-	-	-
KAIKOGA021014	70.6757	1278.36	5.60275	8.93371	0.0494545	0.0787352
KAIKOGA021124	6.67	19.02	-	-	-	-
KAIKOGA023220	30.14	3.89	-	-	-	-
KAIKOGA023222	26.66	5.69	-	-	-	-
KAIKOGA023608	14.519	31.415	-	-	-	-
KAIKOGA027869	30.11	32.03	-	-	-	-
KAIKOGA030051	21.589	391.95	-	-	-	-
KAIKOGA033597	268.591	2484.78	3.45795	3.74549	0.305813	0.455893
KAIKOGA038177	8.88	38.53	-	-	-	-
KAIKOGA039395	49.68	79.65	0.836857	0.0753597	0.00400379	0.000878882
KAIKOGA055443	3.17	8.92	-	-	-	-
KAIKOGA055890	4.51	5.62	-	-	-	-
KAIKOGA057761	11.67	23.56	-	-	-	-
KAIKOGA066364	45.48	61.15	-	-	-	-
KAIKOGA066375	14.58	21.32	-	-	-	-
KAIKOGA066383	25.69	22.14	-	-	-	-
KAIKOGA069315	22.31	21.13	-	-	-	-
KAIKOGA069317	24.56	32.15	-	-	-	-
KAIKOGA069319	25.89	44.19	-	-	-	-
KAIKOGA069322	32.77	14.42	-	-	-	-
KAIKOGA069324	33.68	15.99	-	-	-	-
KAIKOGA069325	41.76	7.54	-	-	-	-
KAIKOGA075754	3.55	7.9	-	-	-	-
KAIKOGA087359	6.43	14.59	-	-	-	-
KAIKOGA096197	9.64	12.33	-	-	-	-
KAIKOGA100195	8.79	22.88	-	-	-	-
KAIKOGA100240	2.16	7.82	-	-	-	-
KAIKOGA105769	58.149	79.12	-	-	-	-
KAIKOGA105976	23.13	8.34	-	-	-	-
KAIKOGA106989	21.14	5.59	-	-	-	-
KAIKOGA107421	12.43	21.2	-	-	-	-
KAIKOGA107845	28.59	41.4	-	-	-	-
KAIKOGA109594	9895.62	85960.6	945	289.267	5.66717	3.63154
KAIKOGA110663	31085	47304	945	73.7737	-	-
KAIKOGA112651-1	19.543	21.439	-	-	-	-
KAIKOGA112651-2	22.542	49.51	-	-	-	-
KAIKOGA113162	58.252	78.631	-	-	-	-
